# Supplementary material for: Unexpected rearrangements and a novel synthesis of 1,1-dichloro-1-alkenones from 1,1,1-trifluoroalkanones with aluminium trichloride
Source: publisher site journal article supplement (doi:10.3762/bjoc.17.36), 2021-02-10
Supplement: Additional file 1 [file 1860-5397-17-36-S1.pdf]

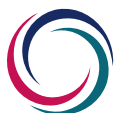

## Supporting Information

for

### **Unexpected rearrangements and a novel synthesis of 1,1-dichloro-1-alkenones from 1,1,1-trifluoroalkanones with aluminium trichloride**

Beatrice Lansbergen, Catherine S. Meister and Michael C. McLeod

*Beilstein J. Org. Chem.* **2021**, *17*, 404–409. [doi:10.3762/bjoc.17.36](https://doi.org/10.3762/bjoc.17.36)

### **Detailed experimental procedures and NMR spectra for all compounds referenced**

## Table of contents

|                                                                         |     |
|-------------------------------------------------------------------------|-----|
| 1. Reactions of (thio)ethers with $\text{AlCl}_3$ .....                 | S2  |
| 2. General Information.....                                             | S2  |
| 3. Experimental procedures and spectral data .....                      | S3  |
| 4. $^1\text{H}$ - and $^{13}\text{C}$ -NMR spectra, 2D NMR spectra..... | S16 |

## 1. Reactions of (thio)ethers with AlCl<sub>3</sub>

Upon treatment of (thio)ethers **S2**, **S3** and **S4** with AlCl<sub>3</sub> under the standard conditions (see below), complex reaction mixtures were obtained, from which no clean products could be isolated (Scheme S1).

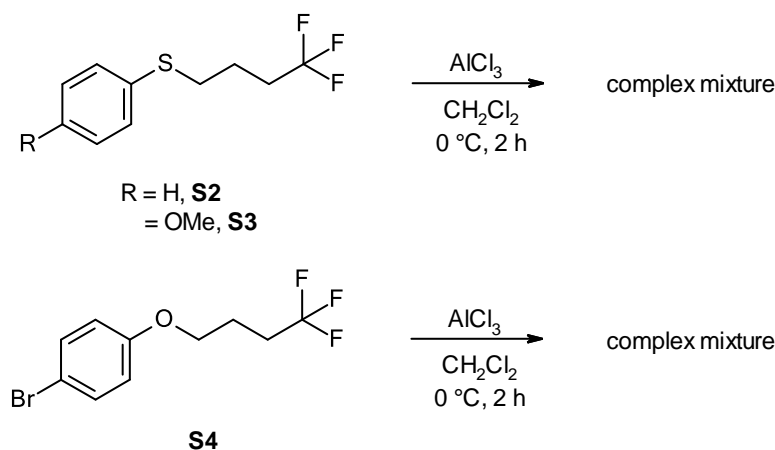

**Scheme S1:** Reaction of (thio)ethers with AlCl<sub>3</sub>.

## 2. General information

All reagents bought from commercial sources were used as received without further purification. Reactions carried out at 0 °C were conducted using a water/ice bath. Anhydrous solvents were purchased from commercial suppliers. MgSO<sub>4</sub> was used as the drying reagent to dry organic phases. Normal phase column chromatography was carried out using a Biotage Isolera™ using CHROMABOND flash SiOH columns (Macherey-Nagel) with columns in sizes between 15 g to 40 g. The solvent system was ethyl acetate, heptane and methanol at various gradient systems. Reversed-phase column chromatography was carried out using Biotage<sup>R</sup> Ultra C<sub>18</sub> SNAP 12 g column. The solvent system was water and acetonitrile at various gradient systems. If no method of purification is stated, then the product was deemed pure enough for use in subsequent steps without purification. The purity of all compounds was determined by <sup>1</sup>H NMR. All 1D and 2D NMR spectra were recorded using a Bruker AVII spectrometer with a Bruker TBI-probe. <sup>1</sup>H NMR spectra were recorded at 400 MHz or 600 MHz, <sup>13</sup>C NMR spectra were recorded at 100 or 150 MHz and <sup>19</sup>F NMR spectra were recorded at 376 MHz. CDCl<sub>3</sub> was used as the solvent. All chemical shift values are referenced to TMS and reported in ppm to 1 Hz resolution. LCMS spectra were obtained by an Agilent LC spectrometer with a 3100 Mass Detector (SQD) using electron ionization (EI) technique. High resolution mass spectrometry (HRMS) was obtained by a Waters spectrometer with Q-ToF Premiers using electron spray ionization.

### 3. Experimental procedures and spectral data

#### General procedure A for the formation of 1,1,1-trifluoroalkanones 5

A dry 2-necked round-bottomed flask attached to a condenser was filled with magnesium (8 mmol, 2 equiv) under argon and stirred for 30 minutes. An iodine crystal was added. The mixture was warmed gently and stirred vigorously for 10 minutes. Dry diethyl ether (10 mL) was added followed by the dropwise addition of 1,1,1-trifluoro-4-iodo-butane (4 mmol, 2 equiv) at such a rate as to maintain a gentle reflux. After the addition was complete, the mixture was stirred at reflux for an additional 30 minutes.

This solution of 4,4,4-trifluorobutylmagnesium iodide (10 mL, 2 equiv) was added to a solution of the corresponding benzonitrile (4 mmol, 1 equiv) and CuBr (0.2 mmol, 5.0 mol %) in dry THF (10 mL) at 0 °C under argon. The reaction was heated to 50 °C for 2 h. Upon completion the reaction was cooled to room temperature and quenched with 2M HCl (5 mL). The aqueous layer was extracted with ethyl acetate (3 × 20 mL). The organic layers were combined, dried (MgSO<sub>4</sub>), filtered, and concentrated. The resulting residue was purified by automated flash column chromatography (40 g silica, 0–100% heptane/ethyl acetate). In some cases further purification by reversed-phase column chromatography was required (12 g silica, 0–100% water/acetonitrile).

#### **5,5,5-Trifluoro-1-(2-methoxyphenyl)pentan-1-one (5a)**

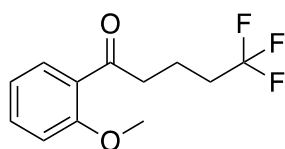

Following general procedure A, reaction of 2-methoxybenzonitrile (**4a**, 666 mg, 5.00 mmol) provided **5a** as yellow oil (290 mg, 24% yield);  $\delta_{\text{H}}$  (400 MHz, CDCl<sub>3</sub>) 7.71 (1H, dd, *J* 7.6, 1.6), 7.49-7.45 (1H, m), 7.03-6.99 (2H, m), 3.91 (3H, s), 3.08 (2H, t, *J* 6.8), 2.22-2.15 (2H, m), 2.01-1.95 (2H, m);  $\delta_{\text{C}}$  (150 MHz, CDCl<sub>3</sub>) 201.0, 158.6, 133.7, 130.3, 127.9, 127.2 (q, *J* 274.5), 120.7, 111.5, 55.4, 42.2, 33.1 (q, *J* 28.5), 16.8; *m/z* (ESI+) found [M+H]<sup>+</sup> 247.0956. C<sub>12</sub>H<sub>13</sub>F<sub>3</sub>O<sub>2</sub><sup>+</sup> requires 247.0946.

#### **5,5,5-Trifluoro-1-(3-methoxyphenyl)pentan-1-one (5b)**

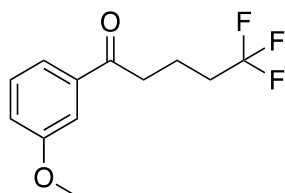

Following general procedure A, reaction of 3-methoxybenzonitrile (**4b**, 2.0 g, 15 mmol) provided **5b** as yellow oil (2.7 g, 72% yield);  $\delta_{\text{H}}$  (400 MHz, CDCl<sub>3</sub>) 7.53 (1H, d, *J* 7.6), 7.49-7.48 (1H, m), 7.38 (1H, dd, *J* 8.0, 8.0), 7.12 (1H, dd, *J* 8.0, 1.6), 3.86 (3H, s), 3.07 (2H, t, *J* 6.4), 2.25-2.18 (2H, m), 2.06-2.01 (2H, m);

$\delta_c$  (150 MHz,  $\text{CDCl}_3$ ) 198.5, 159.9, 138.0, 129.9, 127.1 (q,  $J$  274.5), 120.6, 119.7, 112.3, 55.5, 36.9, 33.0 (q,  $J$  28.5), 16.5;  $m/z$  (ESI+) found  $[\text{M}+\text{H}]^+$  247.0947.  $\text{C}_{12}\text{H}_{13}\text{F}_3\text{O}_2^+$  requires 247.0946.

#### 5,5,5-Trifluoro-1-phenyl-pentan-1-one (5c)

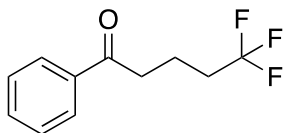

Following general procedure A, reaction of benzonitrile (**4c**, 5.0 g, 48 mmol) provided **5c** as white crystals (340 mg, 3% yield) after purification by reverse phase column chromatography;  $\delta_H$  (600 MHz,  $\text{CDCl}_3$ ) 7.96 (2H, d,  $J$  7.2), 7.61-7.54 (1H, m), 7.48 (2H, dd,  $J$  7.8, 7.8), 3.09 (2H, t,  $J$  7.2), 2.26-2.18 (2H, m), 2.06-2.01 (2H, m);  $\delta_c$  (150 MHz,  $\text{CDCl}_3$ ) 198.6, 136.7, 133.3, 128.7, 128.1, 128.0, 127.1 (q,  $J$  274.5), 36.9, 33.0 (q,  $J$  28.5), 16.5;  $m/z$  (ESI+) 217.1  $[\text{M}+\text{H}]^+$ . No high resolution MS could be obtained for this compound.

#### 1-(4-Chlorophenyl)-5,5,5-trifluoro-pentan-1-one (5d)

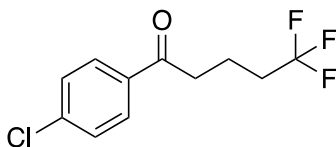

Following general procedure A, reaction of 4-chlorobenzonitrile (**4d**, 550 mg, 4.00 mmol) provided **5d** as pale yellow oil (866 mg, 86% yield);  $\delta_H$  (600 MHz,  $\text{CDCl}_3$ ) 7.90-7.88 (2H, m), 7.47-7.43 (2H, m), 3.05 (2H, t,  $J$  7.2), 2.25-2.17 (2H, m), 2.08-2.00 (2H, m);  $\delta_c$  (150 MHz,  $\text{CDCl}_3$ ) 197.4, 139.8, 135.0, 129.3, 129.2, 127.1 (q,  $J$  274.5), 36.9, 32.9 (q,  $J$  28.5), 16.4;  $m/z$  (EI+) 250.1  $[\text{M}]^+$ . No high resolution MS could be obtained for this compound.

#### 1-(2-Chlorophenyl)-5,5,5-trifluoro-pentan-1-one (5e)

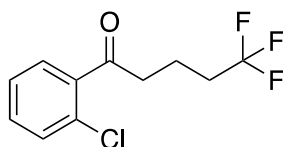

Following general procedure A, reaction of 2-chlorobenzonitrile (**4e**, 687 mg, 5.00 mmol) provided **5e** as clear oil (115 mg, 9% yield) after purification by reverse phase column chromatography;  $\delta_H$  (600 MHz,  $\text{CDCl}_3$ ) 7.46 (1H, dd,  $J$  7.8, 1.8), 7.43-7.40 (2H, m), 7.35-7.32 (1H, m), 3.05 (2H, t,  $J$  7.2), 2.25-2.17 (2H, m), 2.05-1.99 (2H, m);  $\delta_c$  (150 MHz,  $\text{CDCl}_3$ ) 201.9, 139.0, 131.9, 130.8, 130.6, 128.7, 127.0, 127.0 (q,  $J$  274.5), 41.2, 32.8 ( $J$  28.5), 16.5.  $m/z$  (ESI+) found  $[\text{M}+\text{H}]^+$  251.0455.  $\text{C}_{11}\text{H}_{10}\text{ClF}_3\text{O}^+$  requires 251.0451.

### 5,5,5-Trifluoro-1-(*p*-tolyl)pentan-1-one (5f)

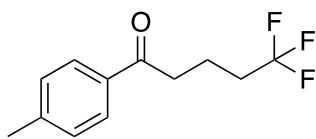

Following general procedure A, reaction of 4-methylbenzonitrile (**4f**, 486 mg, 4.00 mmol) provided **5f** as yellow oil (713 mg, 77% yield);  $\delta_{\text{H}}$  (600 MHz,  $\text{CDCl}_3$ ) 7.85 (2H, d,  $J$  8.4), 7.26 (2H, d,  $J$  8.4), 3.05 (2H, t,  $J$  7.2), 2.41 (3H, s), 2.25-2.17 (2H, m), 2.05-1.98 (2H, m);  $\delta_{\text{C}}$  (150 MHz,  $\text{CDCl}_3$ ) 198.3, 144.1, 132.1, 129.39, 128.8, 127.2 (q,  $J$  274.5), 36.8, 33.0 (q,  $J$  28.5), 21.7, 16.6;  $m/z$  (ESI+) found  $[\text{M}+\text{H}]^+$  231.0994.  $\text{C}_{12}\text{H}_{13}\text{F}_3\text{O}^+$  requires 231.0997.

### 1-(4-Bromophenyl)-5,5,5-trifluoro-pentan-1-one (5g)

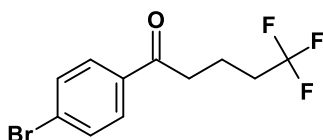

Following general procedure A, reaction of 4-bromobenzonitrile (**4g**, 4.00 g, 22.0 mmol) provided **5g** as pale yellow oil (5.20 g, 80% yield);  $\delta_{\text{H}}$  (400 MHz,  $\text{CDCl}_3$ ) 7.83-7.80 (2H, m), 7.63-7.30 (2H, m), 3.05 (2H, t), 2.28-2.15 (2H, m), 2.06-1.99 (2H, m);  $\delta_{\text{C}}$  (150 MHz,  $\text{CDCl}_3$ ) 197.6, 135.3, 132.0, 129.5, 128.5, 127.1 (q,  $J$  275), 36.7, 32.9 (q,  $J$  29), 16.4;  $m/z$  (ESI+) found  $[\text{M}+\text{H}]^+$  294.9957.  $\text{C}_{11}\text{H}_{11}\text{OF}_3\text{Br}^+$  requires 294.9945.

### 5,5,5-Trifluoro-1-(2-naphthyl)pentan-1-one (5h)

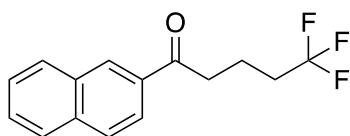

Following general procedure A, reaction of naphthalene-2-carbonitrile (**4h**, 612 mg, 4.00 mmol) provided **5h** as clear oil (340 mg, 32% yield) after purification by reverse phase column chromatography;  $\delta_{\text{H}}$  (600 MHz,  $\text{CDCl}_3$ ) 8.47 (1H, s), 8.03-8.02 (1H, m), 7.80 (1H, d,  $J$  7.8), 7.92-7.88 (2H, m), 7.62-7.57 (2H, m), 3.23 (2H, t,  $J$  7.2), 2.31-2.23 (2H, m), 2.12-2.07 (2H, m);  $\delta_{\text{C}}$  (150 MHz,  $\text{CDCl}_3$ ) 198.6, 135.7, 134.0, 132.5, 129.6, 129.6, 128.6, 127.8, 127.1 (q,  $J$  274.5), 126.9, 123.7, 36.9, 33.0 (q,  $J$  28.5), 16.6;  $m/z$  (ESI+) found  $[\text{M}+\text{H}]^+$  267.1004.  $\text{C}_{15}\text{H}_{13}\text{F}_3\text{O}^+$  requires 267.0997.

### 5,5,5-Trifluoro-1-(2-pyridyl)pentan-1-one (5i)

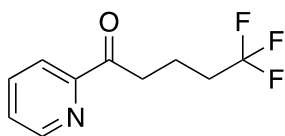

Following general procedure A and column chromatography using 0–100% heptane/ethyl acetate + 0–20% methanol gradient system, the reaction of pyridine-2-carbonitrile (**4i**, 416 mg, 4.00 mmol) provided **5i** as yellow oil (367 mg, 42% yield);  $\delta_{\text{H}}$  (600 MHz,  $\text{CDCl}_3$ ) 8.68 (1H, d,  $J$  7.8), 8.05 (1H, d,  $J$  7.8), 7.85 (1H, ddd,  $J$  7.8, 7.8, 1.8), 7.49 (1H, ddd,  $J$  7.8, 4.8, 1.2), 3.33 (2H, t,  $J$  7.2), 2.26–2.18 (2H, m), 2.05–2.00 (2H, m);  $\delta_{\text{C}}$  (150 MHz,  $\text{CDCl}_3$ ) 200.5, 153.1, 149.0, 137.0, 127.3, 127.1 (q,  $J$  274.5), 121.7, 36.2, 33.0 (q,  $J$  28.5), 16.4;  $m/z$  (ESI+) found  $[\text{M}+\text{H}]^+$  218.0803.  $\text{C}_{10}\text{H}_{10}\text{F}_3\text{NO}^+$  requires 218.0793.

### 5,5,5-Trifluoro-1-(3-pyridyl)pentan-1-one (5j)

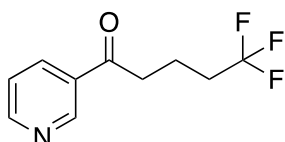

Following general procedure A and column chromatography using 0–100% heptane/ethyl acetate + 0–20% methanol gradient system, the reaction of pyridine-3-carbonitrile (**4j**, 416 mg, 4.00 mmol) provided **5j** as yellow oil (71 mg, 8% yield);  $\delta_{\text{H}}$  (600 MHz,  $\text{CDCl}_3$ ) 9.19 (1H, s), 8.82 (1H, d,  $J$  3.6), 8.23 (1H, ddd,  $J$  1.8, 2.4, 7.8), 7.44 (1H, dd,  $J$  4.8, 7.8), 3.11 (2H, t,  $J$  6.60), 2.28–2.20 (2H, m), 2.09–2.04 (2H, m);  $\delta_{\text{C}}$  (150 MHz,  $\text{CDCl}_3$ ) 197.4, 171.2, 159.9, 153.7, 149.5, 135.3, 127.0 (q,  $J$  274.5), 123.8, 37.1, 32.9 (q,  $J$  28.5), 16.1;  $m/z$  (ESI+) found  $[\text{M}+\text{H}]^+$  218.0803.  $\text{C}_{10}\text{H}_{10}\text{F}_3\text{NO}^+$  requires 218.0793.

### 5,5,5-Trifluoro-1-(4-pyridyl)pentan-1-one (5k)

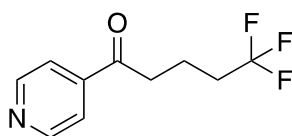

Following general procedure A and column chromatography using 0–100% heptane/ethyl acetate + 0–20% methanol gradient system, the reaction of pyridine-4-carbonitrile (**4k**, 416 mg, 4.00 mmol) provided **5k** as clear oil (64 mg, 30% yield);  $\delta_{\text{H}}$  (600 MHz,  $\text{CDCl}_3$ ) 8.83 (2H, d,  $J$  6.6), 7.72 (2H, d,  $J$  6.0), 3.10 (3H, t,  $J$  7.2), 2.27–2.19 (2H, m), 2.07–2.01 (2H, m);  $\delta_{\text{C}}$  (150 MHz,  $\text{CDCl}_3$ ) 198.0, 151.1, 142.3, 126.9 (q,  $J$  274.5), 120.8, 37.1, 32.7 (q,  $J$  28.5), 16.1;  $m/z$  (ESI+) found  $[\text{M}+\text{H}]^+$  218.0799.  $\text{C}_{10}\text{H}_{10}\text{F}_3\text{NO}^+$  requires 218.0793.

#### 4,4,4-Trifluoro-1-phenyl-butan-1-one (5l)

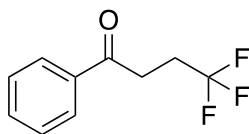

Following general procedure A, reaction of benzonitrile (**4l**, 750 mg, 7.27 mmol) with 1,1,1-trifluoro-3-iodopropane (1.71 mL, 14.5 mmol) provided **5l** as brown oil (337 mg, 23% yield);  $\delta_{\text{H}}$  (600 MHz,  $\text{CDCl}_3$ ) 7.97 (2H, d,  $J$  7.20), 7.60 (1H, dd,  $J$  7.20), 7.50-7.47 (2H, m), 3.72-3.25 (2H, m), 2.64-2.55 (2H, m);  $\delta_{\text{C}}$  (150 MHz,  $\text{CDCl}_3$ ) 196.4, 136.1, 133.6, 129.1, 128.6, 128.0, 127.2 (q,  $J$  274.5), 31.32, 28.3 (q,  $J$  28.5);  $m/z$  (ESI+) 202.1  $[\text{M}+\text{H}]^+$ . No high resolution MS could be obtained for this compound.

#### 5,5,5-Trifluoro-1-(4-methoxyphenyl)pentan-1-one (5n)

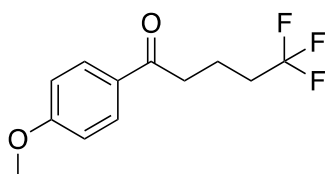

Following general procedure A, reaction of 4-methoxybenzonitrile (**4m**, 4.0 g, 30.0 mmol) provided **5m** as pale yellow oil (6.6 g, 89% yield);  $\delta_{\text{H}}$  (600 MHz,  $\text{CDCl}_3$ ) 7.95-7.92 (2H, m), 6.95-6.93 (2H, m), 3.87 (3H, s), 3.03 (2H, t,  $J$  7.2), 2.25-2.18 (2H, m), 2.04-1.99 (2H, m);  $\delta_{\text{C}}$  (150 MHz,  $\text{CDCl}_3$ ) 197.2, 163.6, 130.2, 130.0, 127.2 (q,  $J$  274.5), 114.0, 55.5, 36.5, 33.1 (q,  $J$  28.5), 16.7;  $m/z$  (ESI+) found  $[\text{M}+\text{H}]^+$  247.0942.  $\text{C}_{12}\text{H}_{13}\text{F}_3\text{O}_2^+$  requires 247.0946.

#### General procedure B for the preparation of 1,1-dichloro-1-alkenes

The corresponding 1,1,1-trifluoroalkaneone (200 mg, 1.00 equiv) was dissolved in  $\text{CH}_2\text{Cl}_2$  (3 mL) in a Radley tube under argon. To this solution was added  $\text{AlCl}_3$  (542 mg, 5.00 equiv) at 0 °C. The solution was stirred at room temperature for 0.5–2.5 h unless stated otherwise. Upon completion of the reaction (monitored by LCMS) the reaction was quenched with 2M HCl and extracted with  $\text{CH}_2\text{Cl}_2$  (3 × 10 mL). The combined organic layers were dried ( $\text{MgSO}_4$ ), filtered, and concentrated. If required, the resulting residue was purified by either flash column chromatography (15 g silica, 0–100% heptane/ethyl acetate) or reversed-phase column chromatography (12 g silica, 0–100% water/acetonitrile).



### 5,5-Dichloro-1-(2-methoxyphenyl)pent-4-en-1-one (6a)

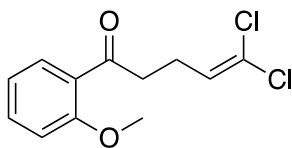

Following general procedure B, reaction of **5a** (200 mg, 0.81 mmol) (1 h) provided **6a** as pale yellow oil (164 mg, 78% yield) with no purification required;  $\delta_{\text{H}}$  (600 MHz,  $\text{CDCl}_3$ ); 7.72 (1H, dd,  $J$  7.8, 1.2), 7.49-7.46 (1H, m), 7.01 (1H, dd,  $J$  7.8, 7.8), 6.97 (1H, d,  $J$  8.4), 5.97 (1H, t,  $J$  7.2), 3.92 (3H, s), 3.10 (2H, t,  $J$  7.2), 2.56 (2H, dt,  $J$  7.2, 7.2);  $\delta_{\text{C}}$  (150 MHz,  $\text{CDCl}_3$ ) 200.6, 158.7, 133.8, 130.4, 129.1, 127.7, 120.7, 120.5, 111.6, 55.5, 41.9, 24.5;  $m/z$  (EI+) 259.3  $[\text{M}+\text{H}]^+$ . No high resolution MS could be obtained for this compound.

### 5,5-Dichloro-1-(3-methoxyphenyl)pent-4-en-1-one (6b)

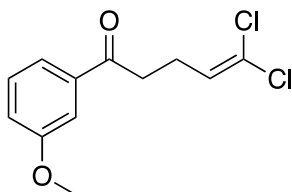

Following general procedure B, reaction of **5b** (244 mg, 0.99 mmol) (1 h) provided **6b** as dark green oil (201 mg, 78% yield) with no purification required;  $\delta_{\text{H}}$  (600 MHz,  $\text{CDCl}_3$ ) 7.53 (1H, d,  $J$  7.2), 7.49-7.48 (1H, m), 7.38 (1H, dd,  $J$  7.8, 7.8) 7.12 (1H, dd,  $J$  7.8, 2.4), 5.99 (1H, t,  $J$  7.2), 3.86 (3H, s), 3.10 (2H, t,  $J$  7.2), 2.60 (2H, dt,  $J$  7.2, 7.2);  $\delta_{\text{C}}$  (150 MHz,  $\text{CDCl}_3$ ) 198.2, 159.9, 137.9, 129.7, 128.5, 121.2, 120.6, 119.8, 112.3, 55.5, 36.8, 24.1;  $m/z$  (ESI+) found  $[\text{M}+\text{H}]^+$  259.0302.  $\text{C}_{12}\text{H}_{12}\text{Cl}_2\text{O}_2^+$  requires 259.0293.

### 5,5,5-Trichloro-1-(3-methoxyphenyl)pentan-1-one (8b)

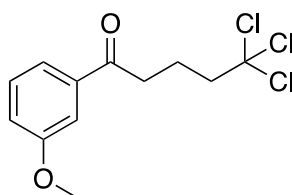

Following General Procedure B, reaction **5b** (200 mg, 0.81 mmol) (0 °C, 1.5 h) provided **8b** as clear oil (56 mg, 23% yield) after purification by reverse phase chromatography;  $\delta_{\text{H}}$  (600 MHz,  $\text{CDCl}_3$ ) 7.54 (1H, d,  $J$  7.8), 7.50 (1H, s), 7.39 (1H, dd,  $J$  7.8, 7.8), 7.13 (1H, dd,  $J$  7.8, 1.8), 3.87 (3H, s), 3.11 (2H, t,  $J$  7.2), 2.79-2.82 (2H, m), 2.24-2.26 (2H, m);  $\delta_{\text{C}}$  (150 MHz,  $\text{CDCl}_3$ ) 198.5, 159.9, 138.0, 129.7, 120.5, 119.7, 116.3, 112.3, 99.6, 55.5, 54.3, 36.8, 21.0;  $m/z$  (ESI+) found  $[\text{M}+\text{H}]^+$  295.0068.  $\text{C}_{12}\text{H}_{13}\text{Cl}_3\text{O}_2^+$  requires 295.0059.

### 5,5-Dichloro-1-phenyl-pent-4-en-1-one (6c)

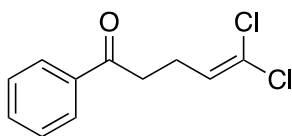

Following general procedure B, reaction of **5c** (170 mg, 0.78 mmol) (40 °C, 1 h) provided **6c** as yellow oil (170 mg, 94% yield) with no purification required;  $\delta_{\text{H}}$  (600 MHz,  $\text{CDCl}_3$ ) 7.96 (2H, d,  $J$  7.8), 7.59-7.57 (1H, m), 7.49-7.46 (2H, m), 6.00 (1H, t,  $J$  7.2), 3.12 (2H, t,  $J$  7.2), 2.61 (2H, dt,  $J$  7.2, 7.2);  $\delta_{\text{C}}$  (150 MHz,  $\text{CDCl}_3$ ) 198.7, 136.7, 133.3, 128.7, 128.5, 128.0, 121.1, 36.7, 24.0;  $m/z$  (EI+) 229.3  $[\text{M}+\text{H}]^+$ . No high resolution MS could be obtained for this compound.

### 5,5-Dichloro-1-(4-chlorophenyl)pent-4-en-1-one (6d)

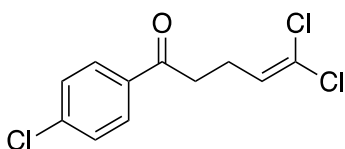

Following general procedure B, reaction of **5d** (200 mg, 0.79 mmol) (1 h) provided **6d** as pale yellow oil (202 mg, 96% yield) with no purification required;  $\delta_{\text{H}}$  (600 MHz,  $\text{CDCl}_3$ ) 7.90-7.89 (2H, m), 7.45 (2H, m), 5.99 (1H, t,  $J$  7.2), 3.08 (2H, t,  $J$  7.2), 2.60 (2H, dt,  $J$  7.2, 7.2);  $\delta_{\text{C}}$  (150 MHz,  $\text{CDCl}_3$ ) 197.4, 139.8, 136.5, 129.4, 129.0, 128.3, 121.4, 36.7, 24.0;  $m/z$  (ESI+) found  $[\text{M}+\text{H}]^+$  262.9814.  $\text{C}_{11}\text{H}_9\text{Cl}_3\text{O}^+$  requires 262.9797.

### 5,5-Dichloro-1-(2-chlorophenyl)pent-4-en-1-one (6e)

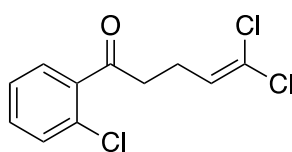

Following general procedure B, reaction of **5e** (115 mg, 0.45 mmol) (40 min) provided **6e** as clear oil (92 mg, 78% yield) with no purification required;  $\delta_{\text{H}}$  (600 MHz,  $\text{CDCl}_3$ ) 7.47 (1H, dd,  $J$  7.8, 1.2), 7.43-7.38 (2H, m), 7.35-7.32 (1H, m), 5.96 (1H, t,  $J$  7.2), 3.09 (2H, t,  $J$  7.2), 2.59 (2H, dt,  $J$  7.2, 7.2);  $\delta_{\text{C}}$  (150 MHz,  $\text{CDCl}_3$ ) 201.6, 138.9, 132.0, 131.0, 130.6, 129.0, 128.0, 127.0, 121.4, 40.9, 24.6.  $m/z$  (ESI+) found  $[\text{M}+\text{H}]^+$  262.9799.  $\text{C}_{11}\text{H}_9\text{Cl}_3\text{O}^+$  requires 262.9797.

### 5,5-Dichloro-1-(*p*-tolyl)pent-4-en-1-one (6f)

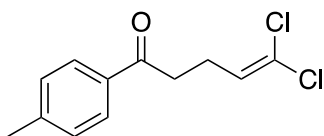

Following general procedure B, reaction of **5f** (200 mg, 0.86 mmol) (1 h) provided **6f** as pale yellow oil (190 mg, 90% yield) with no purification required;  $\delta_{\text{H}}$  (600 MHz,  $\text{CDCl}_3$ ) 7.85 (2H, d,  $J$  8.4), 7.27 (2H, d,  $J$  8.4), 6.00 (1H, t,  $J$  7.2), 3.09 (2H, t,  $J$  7.2), 2.60 (2H, dt,  $J$  7.2, 7.2), 2.42 (3H, s);  $\delta_{\text{C}}$  (150 MHz,  $\text{CDCl}_3$ ) 198.3, 144.1, 134.1, 129.4, 128.6, 128.1, 121.0, 36.6, 24.1, 21.7;  $m/z$  (ESI+) found  $[\text{M}+\text{H}]^+$  243.0354.  $\text{C}_{12}\text{H}_{12}\text{Cl}_2\text{O}^+$  requires 243.0343.

### 5,5-Dichloro-1-(4-bromophenyl)pent-4-en-1-one (6g)

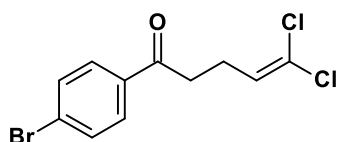

Following general procedure B, reaction of **5g** (250 mg, 0.85 mmol) (0 °C, 1 h) provided **6g** as colourless solid (145 mg, 55% yield) after purification by reverse phase column chromatography;  $\delta_{\text{H}}$  (600 MHz,  $\text{CDCl}_3$ ) 7.82-7.80 (2H, m), 7.62-7.60 (2H, m), 5.98 (2H, t), 3.08 (2H, t), 2.61-2.58 (2H, m);  $\delta_{\text{C}}$  (150 MHz,  $\text{CDCl}_3$ ) 197.3, 135.2, 132.2, 129.7, 128.5, 128.3, 121.3, 36.6, 24.0;  $m/z$  (ESI+) found  $[\text{M}+\text{H}]^+$  306.9247.  $\text{C}_{11}\text{H}_{10}\text{OCl}_2\text{Br}^+$  requires 306.9292.

### 5,5-Dichloro-1-(2-naphthyl)pent-4-en-1-one (6h)

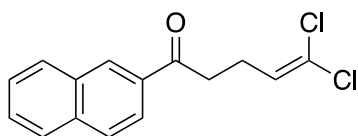

Following general procedure B, reaction of **5h** (140 mg, 0.52 mmol) (0 °C, 1 h) provided **6h** as pale yellow oil (27 mg, 36% yield) after purification of half the crude residue by reverse phase column chromatography;  $\delta_{\text{H}}$  (600 MHz,  $\text{CDCl}_3$ ) 8.47 (1H, s), 8.02 (1H, dd,  $J$  7.8, 1.8), 7.96 (1H, d,  $J$  7.8), 7.90 (1H, d,  $J$  8.4), 7.88 (1H, d,  $J$  8.4), 7.61 (1H, dd,  $J$  8.4, 8.4), 7.56 (1H, dd,  $J$  8.4, 8.4), 6.05 (1H, t,  $J$  7.2), 3.25 (2H, t,  $J$  7.2), 2.66 (2H, dt,  $J$  7.2, 7.2);  $\delta_{\text{C}}$  (150 MHz,  $\text{CDCl}_3$ ) 198.3, 135.7, 133.9, 132.5, 129.8, 129.7, 128.6, 127.8, 126.9, 123.7, 121.2, 36.9, 24.2;  $m/z$  (ESI+) found  $[\text{M}+\text{H}]^+$  279.0349.  $\text{C}_{15}\text{H}_{12}\text{Cl}_2\text{O}^+$  requires 279.0343.

### 5,5-Dichloro-1-(2-pyridyl)pent-4-en-1-one (6i)

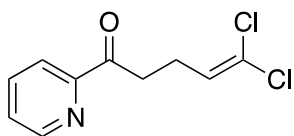

Following general procedure B, reaction of **5i** (200 mg, 0.92 mmol) (0 °C, 1 h) provided **6i** as yellow oil (110 mg, 52% yield) after purification by reverse phase column chromatography;  $\delta_{\text{H}}$  (600 MHz,  $\text{CDCl}_3$ ) 8.68 (1H, d,  $J$  7.2), 8.04 (1H, d,  $J$  7.2), 7.85 (1H, ddd,  $J$  7.2, 4.8, 1.2), 7.49 (1H, ddd,  $J$  7.2, 4.8, 1.2), 6.00 (1H, t,  $J$  7.2), 3.37 (2H, t,  $J$  7.2), 2.60 (2H, dt,  $J$  7.2, 7.2);  $\delta_{\text{C}}$  (150 MHz,  $\text{CDCl}_3$ ) 198.4, 151.1, 147.1, 135.1, 126.9, 125.5, 119.9, 119.0/114.5, 51.6, 34.2, 22.1;  $m/z$  (ESI+) found  $[\text{M}+\text{H}]^+$  230.0133.  $\text{C}_{10}\text{H}_9\text{Cl}_2\text{NO}^+$  requires 230.0139.

### 4,4-Dichloro-1-phenyl-but-3-en-1-one (6l)

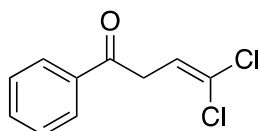

Following general procedure B, reaction of **5l** (200 mg, 0.98 mmol) (rt, 1 h) provided **6l** as yellow oil (113 mg, 53% yield) after purification by flash column chromatography;  $\delta_{\text{H}}$  (600 MHz,  $\text{CDCl}_3$ ) 7.97 (2H, dd,  $J$  7.2, 1.2), 7.67-7.59 (1H, m), 7.51-7.46 (2H, m), 6.35 (1H, t,  $J$  6.60), 3.90 (2H, d,  $J$  6.60);  $\delta_{\text{C}}$  (150 MHz,  $\text{CDCl}_3$ ) 195.0, 136.1, 133.6, 128.8, 128.2, 122.7, 122.5, 39.2;  $m/z$  ( $\text{Cl}+\text{NH}_3$ ) 214.8  $[\text{M}+\text{H}]^+$ , 231.8  $[\text{M}+\text{NH}_4]^+$ . The spectroscopic data is consistent with those in the literature.<sup>1</sup>

### 3,3-Dichloro-1-phenyl-prop-2-ene-1-one (6m)

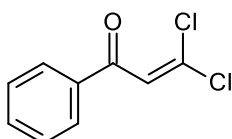

Following general procedure B, reaction of 3,3,3-trifluoro-1-phenyl-1-propanone (300 mg, 1.59 mmol) with 10.0 equiv of  $\text{AlCl}_3$  (5 d) provided **6m** as brown oil (252 mg, 79% yield) with no purification required;  $\delta_{\text{H}}$  (600 MHz,  $\text{CDCl}_3$ ) 7.96-7.91 (2H, m), 7.65-7.59 (1H, m), 7.52-7.48 (2H, m), 7.27 (1H, s),  $\delta_{\text{C}}$  (150 MHz,  $\text{CDCl}_3$ ) 186.6, 136.9, 135.5, 133.7, 128.9, 128.9, 124.1;  $m/z$  201.0  $[\text{M}+\text{H}]^+$ . The spectroscopic data is consistent with those in the literature.<sup>2</sup>

## Preparation of dihydrobenzo[7]annulenones **9** and **10**

5,5-Trifluoro-1-(3-methoxyphenyl)pentan-1-one (**5b**, 200 mg, 0.81 mmol, 1.00 equiv) was dissolved in CH<sub>2</sub>Cl<sub>2</sub> (3 mL) in a Radley tube under argon. To this solution was added AlCl<sub>3</sub> (758 mg, 5.68 mmol, 7.00 equiv) at 0 °C. The solution was stirred at 0 °C for 4 h and warmed to room temperature overnight. The reaction was quenched with 2M HCl and extracted with CH<sub>2</sub>Cl<sub>2</sub> (3 × 10 mL). The combined organic layers were dried (MgSO<sub>4</sub>), filtered, and concentrated. The resulting residue was purified by C18 reversed-phase column chromatography(0–100% water/acetonitrile) to obtain products **9** and **10**.

### **5-Chloro-4-methoxy-7,8-dihydrobenzo[7]annulen-9-one (9)**

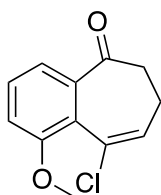

Yellow oil (18 mg, 10% yield);  $\delta_{\text{H}}$  (600 MHz, CDCl<sub>3</sub>) 7.41 (1H, dd, *J* 8.4), 7.11-7.07 (2H, m), 6.45 (1H, t, *J* 7.8), 3.93 (3H, s), 2.87 (2H, t, *J* 6.0), 2.36-2.33 (2H, m);  $\delta_{\text{C}}$  (150 MHz, CDCl<sub>3</sub>) 205.0, 156.9, 140.1, 130.7, 130.6, 129.1, 123.1, 119.4, 114.9, 56.3, 47.3, 22.6; *m/z* (ESI+) 223.1 [MH<sup>+</sup>]. No high resolution MS could be obtained for this compound.

### **5-Chloro-2-methoxy-7,8-dihydrobenzo[7]annulen-9-one (10)**

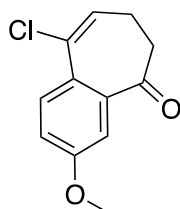

Yellow oil (41 mg, 23% yield);  $\delta_{\text{H}}$  (600 MHz, CDCl<sub>3</sub>) 7.67 (1H, d, *J* 9.0), 7.20 (1H, s), 7.09 (1H, dd, *J* 9.0, 3.0), 6.47 (1H, t, *J* 10.2), 3.87 (3H, s), 2.94-2.92 (2H, m), 2.38-2.35 (2H, m);  $\delta_{\text{C}}$  (150 MHz, CDCl<sub>3</sub>) 203.8, 159.7, 138.9, 131.9, 131.8, 130.8, 127.3, 118.8, 114.7, 56.3, 46.2, 22.1; *m/z* (ESI+) 223.1 [MH<sup>+</sup>]. No high resolution MS could be obtained for this compound.

## Reactions of *p*-methoxy derivative **5m** to obtain **13**, **14**, and **15**

### (*Z*)-5-Chloro-5-(4-methoxyphenyl)pent-4-enoyl chloride (**13**)

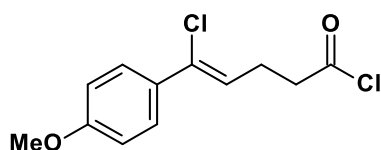

Following general procedure B, reaction of 5,5,5-trifluoro-1-(4-methoxyphenyl)pentan-1-one (**5m**, 200 mg, 0.81 mmol) (rt, 2.5 h) provided **13** as dark oil (190 mg, 95% yield) with no purification required;  $\delta_{\text{H}}$  (600 MHz,  $\text{CDCl}_3$ ) 7.48 (2H, d,  $J$  9.0), 6.87 (2H, d,  $J$  9.0), 6.01 (1H, t,  $J$  7.2), 3.82 (3H, s), 3.10 (2H, t,  $J$  7.2), 2.75 (2H, dt,  $J$  7.2, 7.2);  $\delta_{\text{C}}$  (150 MHz,  $\text{CDCl}_3$ ) 173.2, 160.1, 135.3, 130.2, 127.8, 121.4, 113.7, 55.4, 45.8, 25.1.  $m/z$  (ESI+) shows only mass of corresponding acid: found 241.0642.  $\text{C}_{12}\text{H}_{14}\text{ClO}_3^+$  requires 241.0631.

### (*Z*)-5-Chloro-5-(4-methoxyphenyl)pent-4-enoic acid (**14**)

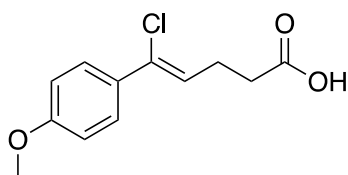

Upon purification of 50% of the above reaction by silica gel flash column chromatography the carboxylic acid derivative was formed and isolated as white solid (67 mg, 68% yield);  $\delta_{\text{H}}$  (600 MHz,  $\text{CDCl}_3$ ) 7.49 (2H, d,  $J$  9.0), 6.86 (2H, d,  $J$  9.0), 6.05 (1H, t,  $J$  7.2), 3.82 (3H, s), 2.69 (2H, dt,  $J$  7.2, 7.2), 2.57 (2H, t,  $J$  7.2);  $\delta_{\text{C}}$  (150 MHz,  $\text{CDCl}_3$ ) 178.3, 159.1, 134.1, 130.6, 127.8, 123.3, 113.6, 55.4, 32.8, 24.7;  $m/z$  (ESI+) found  $[\text{M}-\text{H}]^-$  239.0471.  $\text{C}_{12}\text{H}_{12}\text{Cl}_2\text{O}_2^-$  requires 239.0475.

### 5-(4-Methoxyphenyl)-5-oxo-pentanoic acid (**15**)

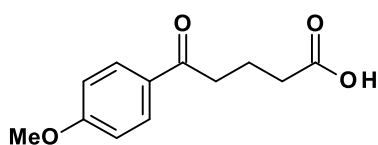

The remaining 50% of (*Z*)-5-chloro-5-(4-methoxyphenyl)pent-4-enoyl chloride (**13**) was suspended in 6M NaOH (3 mL) and stirred at rt overnight. The mixture was acidified with 2M HCl, then extracted with EtOAc ( $\times$  3). The combined organics were dried ( $\text{MgSO}_4$ ) and concentrated. The residue was purified by silica gel chromatography to afford **15** as a colourless solid (55 mg, 61%).  $\delta_{\text{H}}$  (400 MHz,  $\text{CDCl}_3$ ) 7.96-7.94 (2H, m), 6.95-6.92 (2H, m), 3.87 (3H, s), 3.03 (2H, t), 2.50 (2H, t), 2.08 (2H, quintet);  $\delta_{\text{C}}$  (100 MHz,  $\text{CDCl}_3$ ) 198.0, 178.3, 163.5, 130.3, 129.9, 113.8, 55.5, 37.0, 33.0, 19.2. The spectroscopic data is consistent with those in the literature.<sup>3</sup>

## Reaction of (trifluoropentyl)benzene **16** to obtain **17**

### **1-(4-Chlorophenyl)-5,5,5-trifluoro-pentan-1-ol (S-1)**

1-(4-Chlorophenyl)-5,5,5-trifluoro-pentan-1-one (570 mg, 2.27 mmol, 1.00 equiv) was dissolved in methanol (25 mL) and to this solution was added sodium borohydride (103 mg, 2.73 mmol, 1.20 equiv) under argon. The mixture was stirred at room temperature for 3 h and completion determined by LCMS. Then, water was added to the resulting mixture. Methanol was removed in vacuo and the remaining aqueous layer was extracted with ethyl acetate (3 × 50 mL). The organic layer was washed with water (20 mL) and brine (20 mL), then dried (MgSO<sub>4</sub>), filtered, and concentrated. The desired product was obtained as yellow oil without the need for purification.

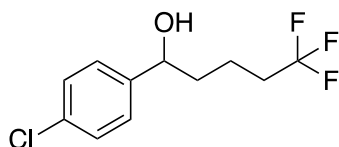

Yellow oil (523 mg, 91% yield);  $\delta_{\text{H}}$  (600 MHz, CDCl<sub>3</sub>) 7.32 (2H, d, *J* 8.4), 7.26 (2H, d, *J* 7.2), 4.66-4.64 (1H, m), 2.13-2.05 (2H, m), 1.83-1.76 (2H, m), 1.75-1.66 (2H, m);  $\delta_{\text{C}}$  (150 MHz, CDCl<sub>3</sub>) 142.7, 133.5, 128.8, 127.1 (q, *J* 274.5), 126.9, 73.6, 37.7, 33.5 (q, *J* 28.5), 18.4; *m/z* (ESI+) found [MH<sup>+</sup>-H<sub>2</sub>O] 235.0494. C<sub>11</sub>H<sub>12</sub>ClF<sub>3</sub>O<sup>+</sup>-H<sub>2</sub>O requires 235.0501.

### **1-Chloro-4-(5,5,5-trifluoropentyl)benzene (16)**

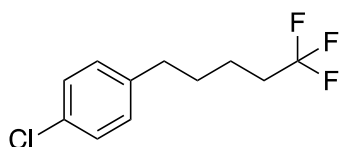

1-(4-Chlorophenyl)-5,5,5-trifluoro-pentan-1-ol (**S-1**, 500 mg, 1.98 mmol, 1.00 equiv) was dissolved in CH<sub>2</sub>Cl<sub>2</sub> (30 mL) and to this solution were added trimethylsilane (4.71 mL, 29.7 mmol, 15.0 equiv) and boron trifluoride ethyl etherate (1.00 mL, 7.92 mmol, 4.00 equiv) at 0 °C under argon. The mixture was stirred at room temperature for 4 h and completion monitored by LCMS. To the mixture, water was added (15 mL) and the layers were separated. The organic layer was washed with water and dried (MgSO<sub>4</sub>), filtered, and concentrated. The resulting residue was purified by flash column chromatography (40 g silica, 0-100% heptane/ethyl acetate) to obtain the desired product as colourless oil (160 mg, 34% yield);  $\delta_{\text{H}}$  (600 MHz, CDCl<sub>3</sub>) 7.24 (2H, d, *J* 8.4), 7.09 (2H, d, *J* 8.4), 2.60 (2H, t, *J* 7.8), 2.12-2.04 (2H, m), 1.70-1.63 (2H, m), 1.61-1.54 (2H, m);  $\delta_{\text{C}}$  (150 MHz, CDCl<sub>3</sub>) 140.3, 131.7, 129.9, 128.5, 127.2 (q, *J* 274.5), 34.7, 33.6 (q, *J* 28.5), 30.3, 14.1; *m/z* (EI+) 236.0 [M+H]<sup>+</sup>. No high resolution MS could be obtained for this compound.

### 2,5-Dichloro-8,9-dihydro-7H-benzo[7]annulene (17)

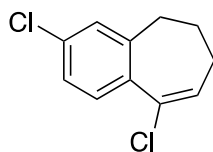

1-Chloro-4-(5,5,5-trifluoropentyl)benzene (**16**, 160 mg, 0.67 mmol, 1.00 equiv) was dissolved in CH<sub>2</sub>Cl<sub>2</sub> (3 mL) in a Radley tube under argon. To this solution was added AlCl<sub>3</sub> (450 mg, 3.38 mmol, 5.00 equiv) at 0 °C. The solution was stirred at 0 °C for 60 min. Upon completion (LCMS), the reaction was quenched with 2M HCl and extracted with CH<sub>2</sub>Cl<sub>2</sub> (3 × 10 mL). The combined organic layers were dried (MgSO<sub>4</sub>), filtered, and concentrated. The resulting residue was purified by flash column chromatography (15 g silica, 0-100% heptane/ethyl acetate) to afford a yellow oil (70 mg, 49% yield); δ<sub>H</sub> (600 MHz, CDCl<sub>3</sub>) 7.51 (1H, d, *J* 8.4), 7.26 (1H, dd, *J* 8.4, 3.6), 7.19 (1H, d, *J* 2.4), 6.39 (1H, t, *J* 7.2), 2.64 (2H, t, *J* 6.6), 2.13-2.08 (2H, m), 1.99 (2H, dd, *J* 8.4, 7.2); δ<sub>C</sub> (150 MHz, CDCl<sub>3</sub>) 142.7, 136.0, 133.8, 129.7, 129.6, 129.5, 128.6, 126.4, 33.2, 32.2, 26.0; *m/z* (ESI+) found [M+H]<sup>+</sup> 213.0248. C<sub>11</sub>H<sub>10</sub>Cl<sub>2</sub><sup>+</sup> requires 213.0238.

### General procedure C for the formation of ethers and thioethers

Thiophenol or phenol (1.0 equiv) were dissolved in THF or DMF. Potassium carbonate (1.5 equiv) was added to the mixture, followed by 1,1,1-trifluoro-4-iodobutane (1.5 equiv). The reaction was heated to 65 °C until completion as determined by LCMS. The reaction mixture was cooled and filtered. The filtrate was concentrated, and the resulting residue was purified by automated flash column chromatography (40 g silica, 0–100% heptane/ethyl acetate).

### 4,4,4-Trifluorobutylsulfanylbenzene (S-2)

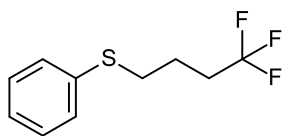

Following general procedure C, the reaction of thiophenol (1.0 g) provided **S-2** as clear oil (1.8 g, 90% yield); δ<sub>H</sub> (400 MHz, CDCl<sub>3</sub>) 7.37-7.19 (5H, m), 2.97 (2H, t, *J* 8.0), 2.31-2.19 (2H, m), 1.92-1.85 (2H, m), δ<sub>C</sub> (150 MHz, CDCl<sub>3</sub>) 135.3, 130.0, 129.7, 127.0 (q, *J* 274.5), 126.6, 32.9, 32.5 (q, *J* 28.5), 21.6, *m/z* (ESI+) found to oxidise to sulfoxide [M+H]<sup>+</sup> 237.0568. C<sub>10</sub>H<sub>12</sub>F<sub>3</sub>OS<sup>+</sup> requires 237.0555.



### 1-Methoxy-4-(4,4,4-trifluorobutylsulfanyl)benzene (S-3)

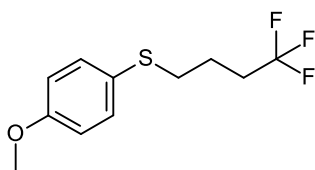

Following general procedure C, reaction of 4-methoxythiophenol (1.0 g) provided **S-3** as yellow oil (1.2 g, 68% yield);  $\delta_{\text{H}}$  (600 MHz,  $\text{CDCl}_3$ ) 7.40-7.35 (2H, m), 6.86-6.83 (2H, m), 3.80 (3H, s), 2.85 (2H, t, J 6.0), 2.27-2.19 (2H, m), 1.81 (2H, t, J 6.0),  $\delta_{\text{C}}$  (150 MHz,  $\text{CDCl}_3$ ) 134.1, 133.8, 127.0 (q, J 274.0), 114.7, 114.6, 55.4, 35.0, 32.4 (q, J 28.5), 21.6, m/z (ESI+) found to oxidise to sulfoxide  $[\text{M}+\text{H}]^+$  267.0667.  $\text{C}_{11}\text{H}_{14}\text{F}_3\text{O}_2\text{S}^+$  requires 267.0661.

### 1-Bromo-4-(4,4,4-trifluorobutoxy)benzene (S-4)

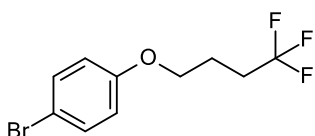

Following general procedure C, reaction of 4-bromophenol (1.0 g) provided **S-4** as clear oil (1.1 g, 68% yield);  $\delta_{\text{H}}$  (600 MHz,  $\text{CDCl}_3$ ) 7.38-7.36 (2H, m), 6.77-6.76 (2H, m), 3.98-3.97 (2H, m), 2.34-2.27 (2H, m), 2.05-2.04 (2H, m),  $\delta_{\text{C}}$  (150 MHz,  $\text{CDCl}_3$ ) 157.7, 132.6, 127.1 (q, J 274.5), 116.4, 113.2, 66.3, 30.7 (q, J 28.5), 22.1, m/z (ESI+) not found.

### References:

- [1] Guirado. A; Martiz. B; Andreu. R; Bautista. D; Galvez. J. *Tetrahedron* **2007**, 63, 1175-1182.
- [2] Ram, R.-N; Soni, V.-K. *J. Org. Chem.* **2015**, 80, 8922-8928.
- [3] Hou, R.-S.; Wang, H.-M.; Lin, Y.-C.; Chen, L.-C. *Heterocycles* **2005**, 65, 649-656.

# 4. <sup>1</sup>H- and <sup>13</sup>C-NMR spectra, 2D NMR spectra

## 5,5-Trifluoro-1-(2-methoxyphenyl)pentan-1-one (5a)

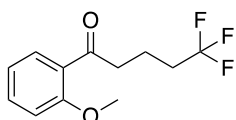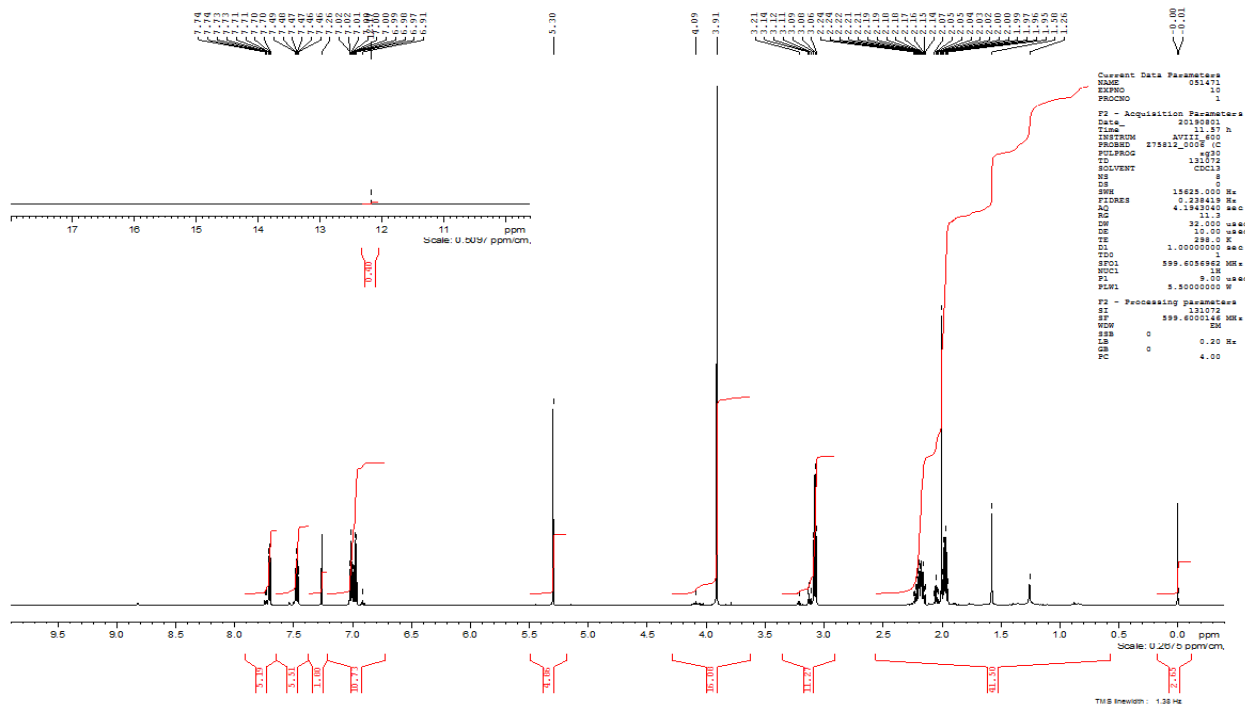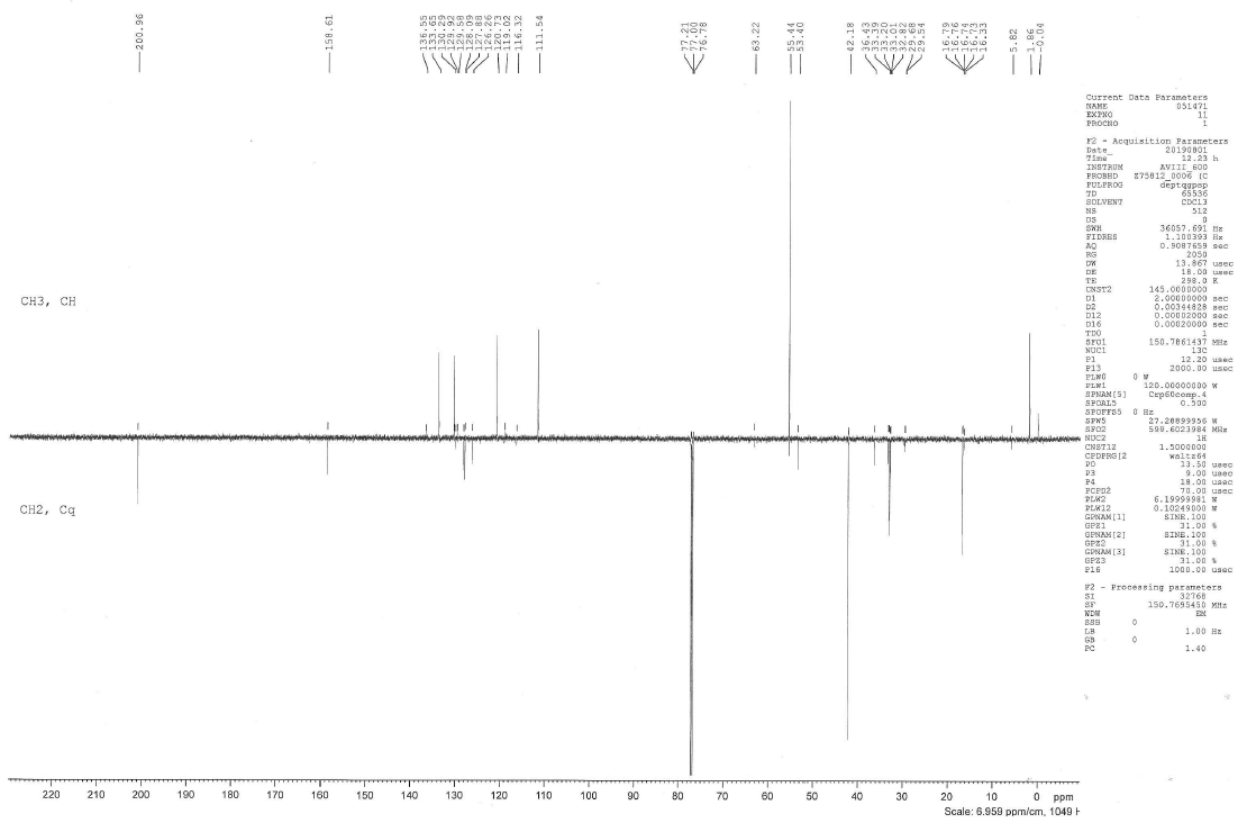

# 5,5-Trifluoro-1-(3-methoxyphenyl)pentan-1-one (5b)

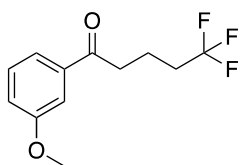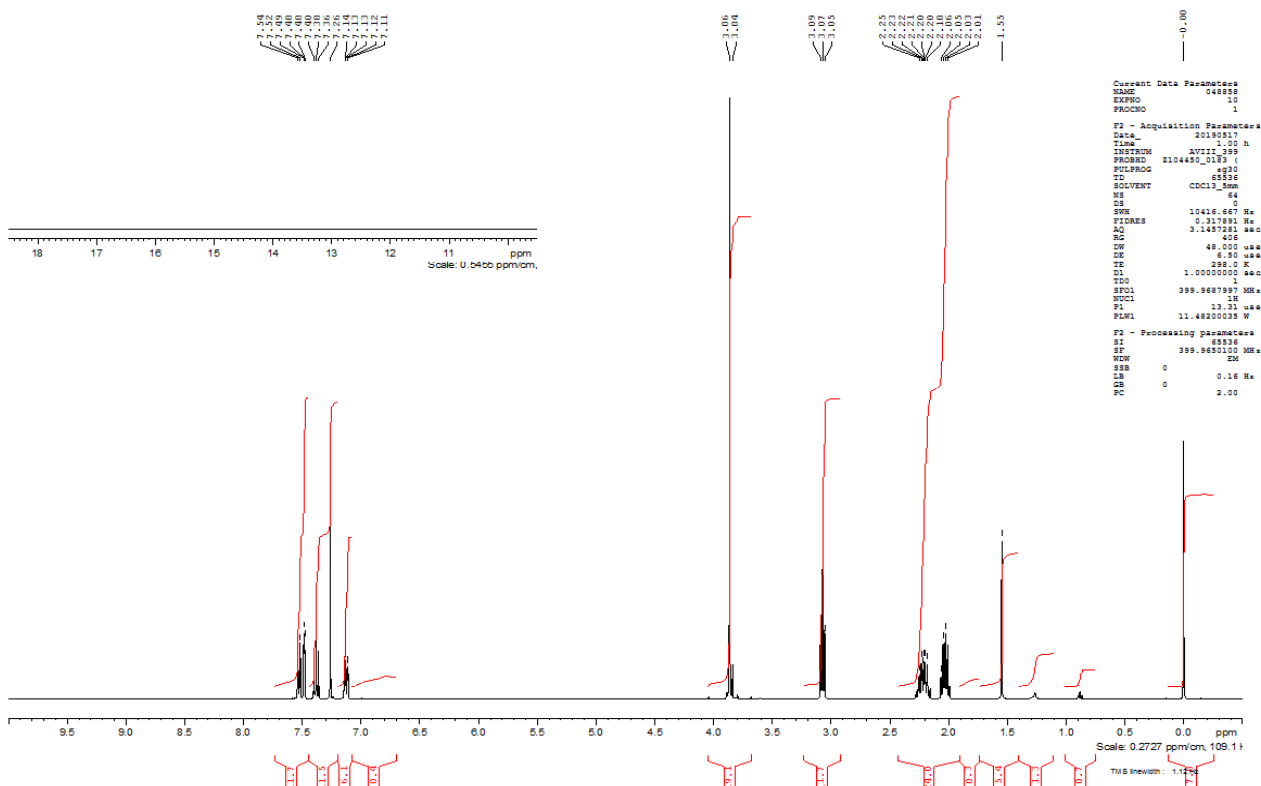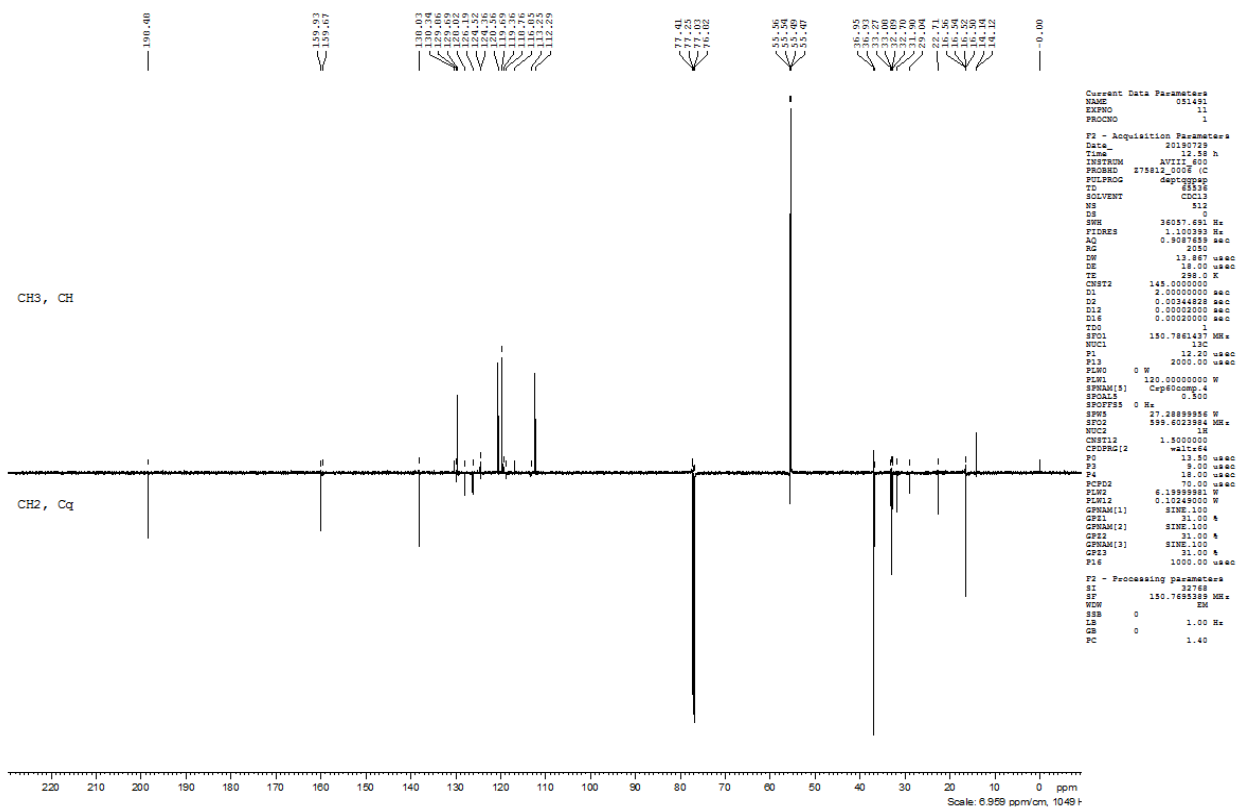

5,5,5-Trifluoro-1-phenyl-pentan-1-one (5c)

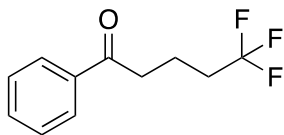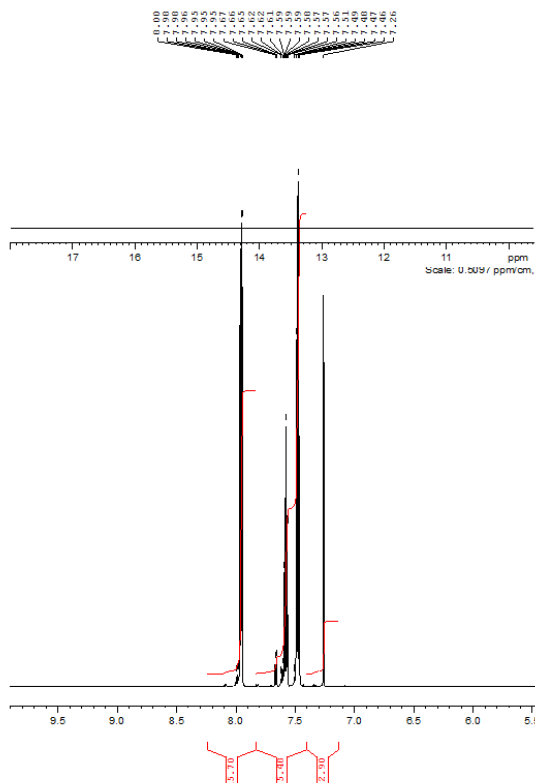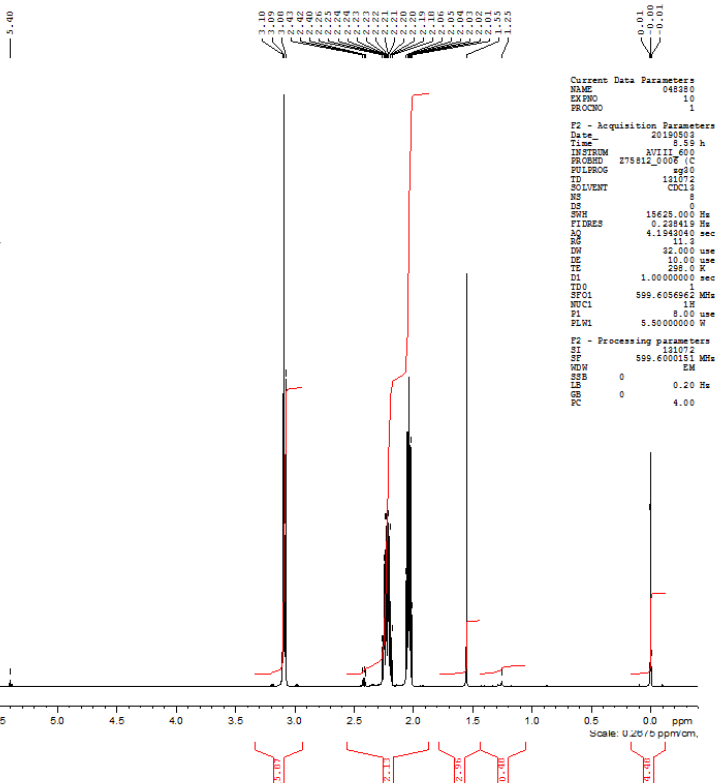

```

Current Data Parameters
NAME      04980
EXPNO    1
PROCNO   1

F2 - Acquisition Parameters
Date_    20190503
Time     9:13 h
INSTRUM  AVIII_600
PROBHD   5MM1H1_0006 (C
PULPROG  zgpg30
TD        131072
SOLVENT  CDCl3
NS        8
DS        4
SWH       15625.000 Hz
FIDRES   0.228419 Hz
AQ        4.1264900 sec
RG         11.0
AQ        22.000000 usec
DE         18.00 usec
TE        298.0 K
D1         1.00000000 sec
D11        0.00
SFO1      599.6056662 MHz
NUC1       13
P1         8.00 usec
PLM1      5.50000000 W

F2 - Processing parameters
SI         131072
SF         599.6001511 MHz
WDW        EM
SSB        0
GB         0.20 Hz
PC         4.00
    
```

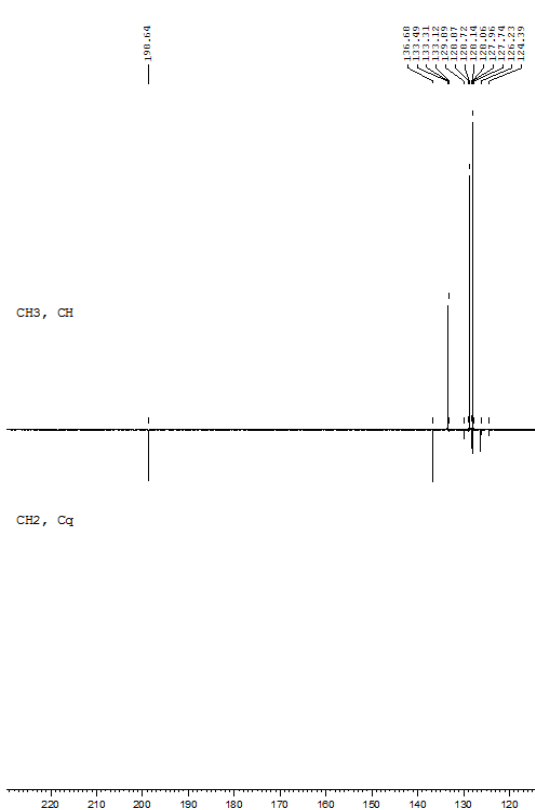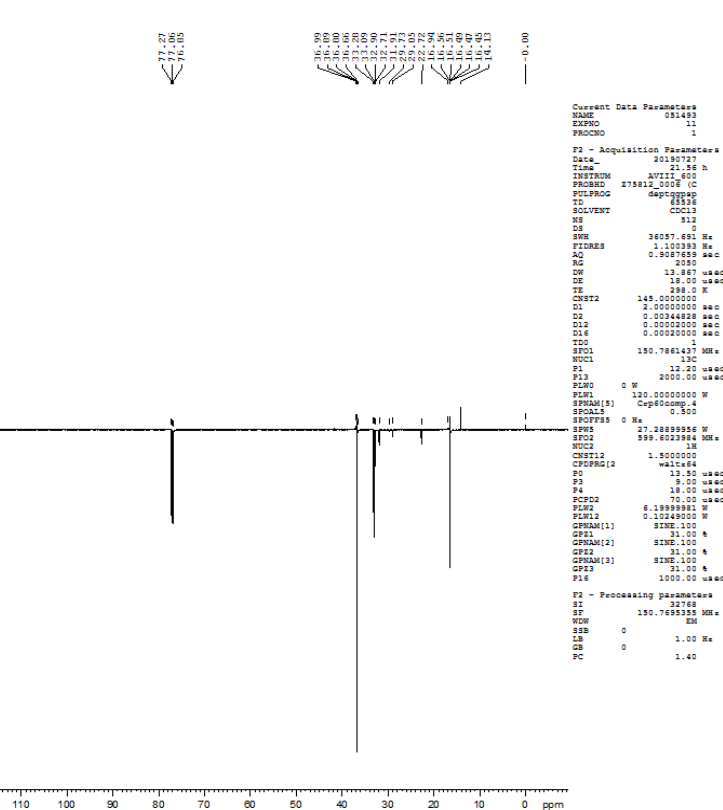

```

Current Data Parameters
NAME      031493
EXPNO    1
PROCNO   1

F2 - Acquisition Parameters
Date_    20190727
Time     21:36 h
INSTRUM  AVIII_600
PROBHD   5MM1H1_0006 (C
PULPROG  zgpg30
TD        65536
SOLVENT  CDCl3
NS        812
DS        4
SWH       36057.891 Hz
FIDRES   1.100399 Hz
AQ        0.9087859 sec
RG         2000
AQ        13.487 usec
DE         18.00 usec
TE        298.0 K
D1         1.00000000 sec
D11        0.00
SFO1      150.7461437 MHz
NUC1       13C
P1         12.00 usec
PLM1      2000.00 usec

F2 - Processing parameters
SI         65536
SF         150.7453355 MHz
WDW        EM
SSB        0
GB         1.00 Hz
PC         1.40
    
```

# 1-(4-Chlorophenyl)-5,5,5-trifluoro-pentan-1-one (5d)

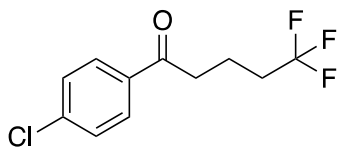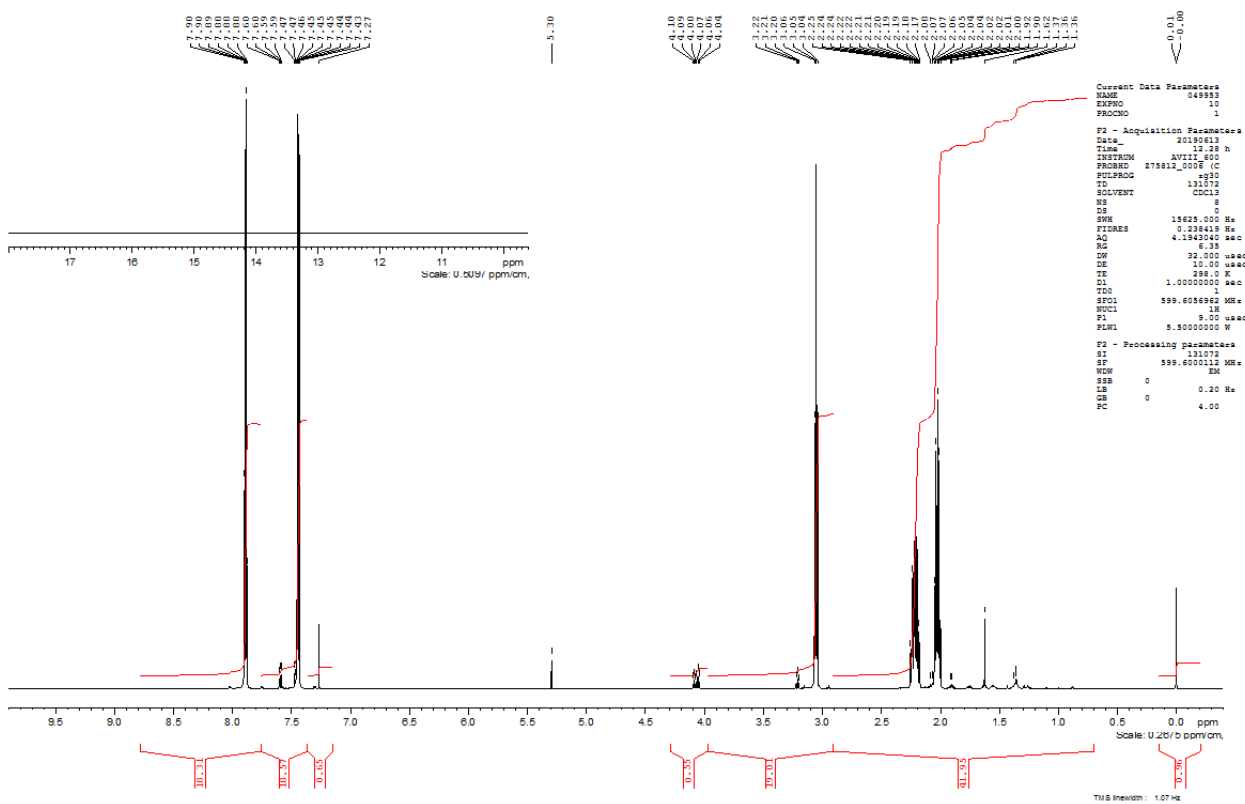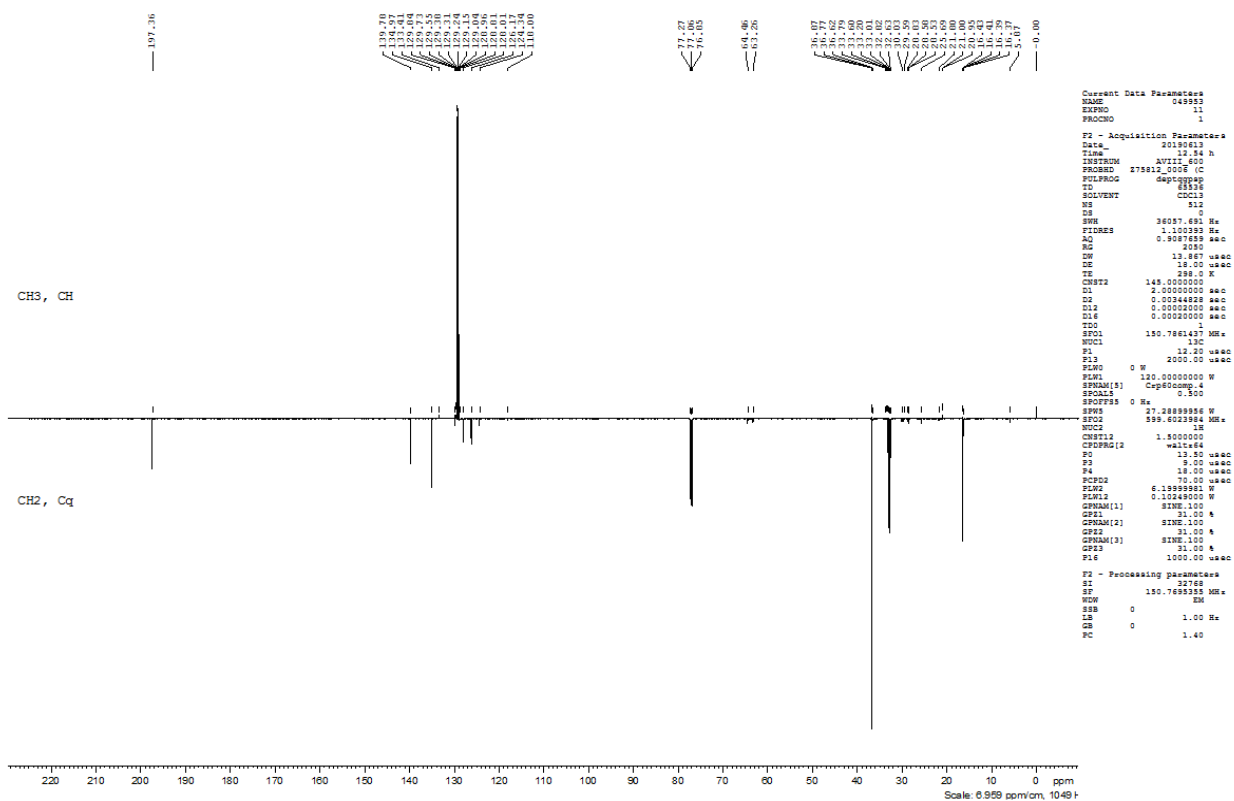

# 1-(2-Chlorophenyl)-5,5,5-trifluoro-pentan-1-one (5e)

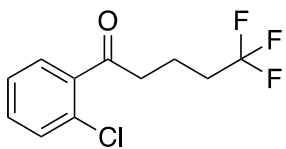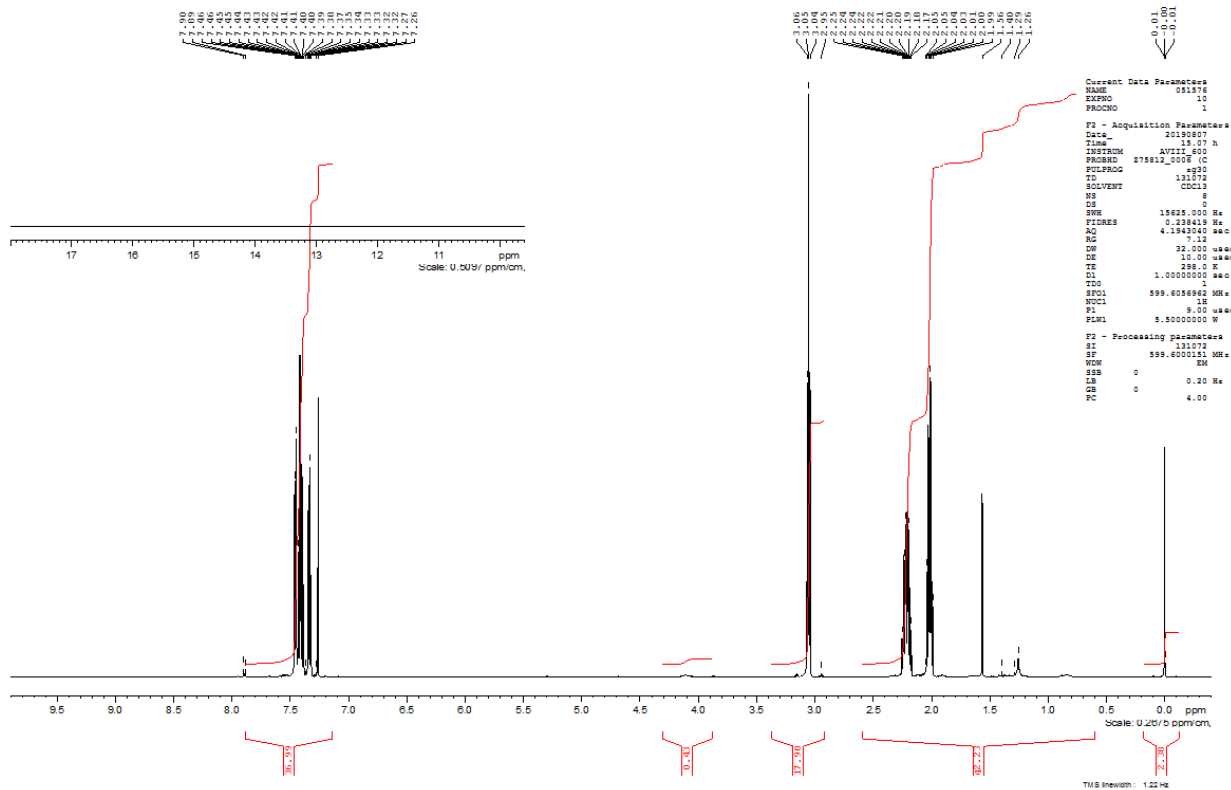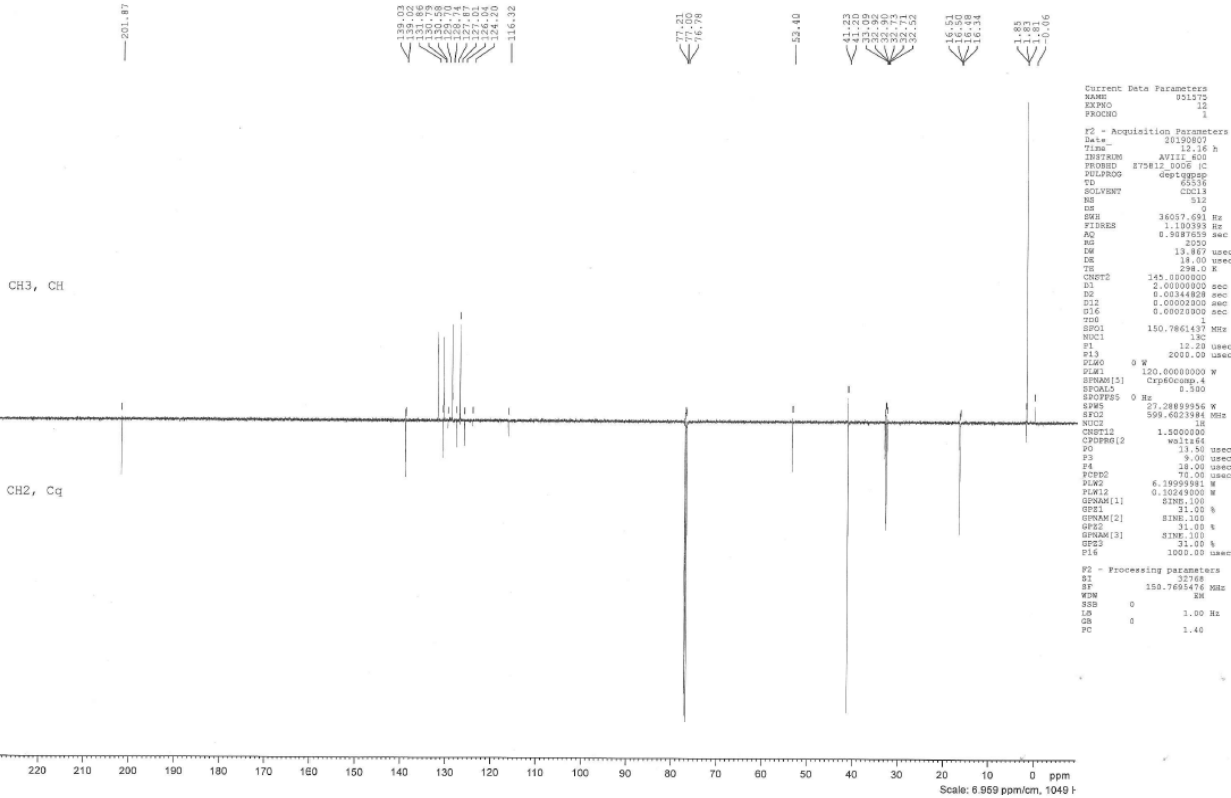

5,5,5-Trifluoro-1-(*p*-tolyl)pentan-1-one (5f)

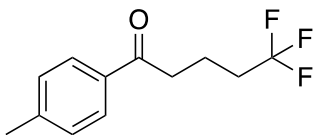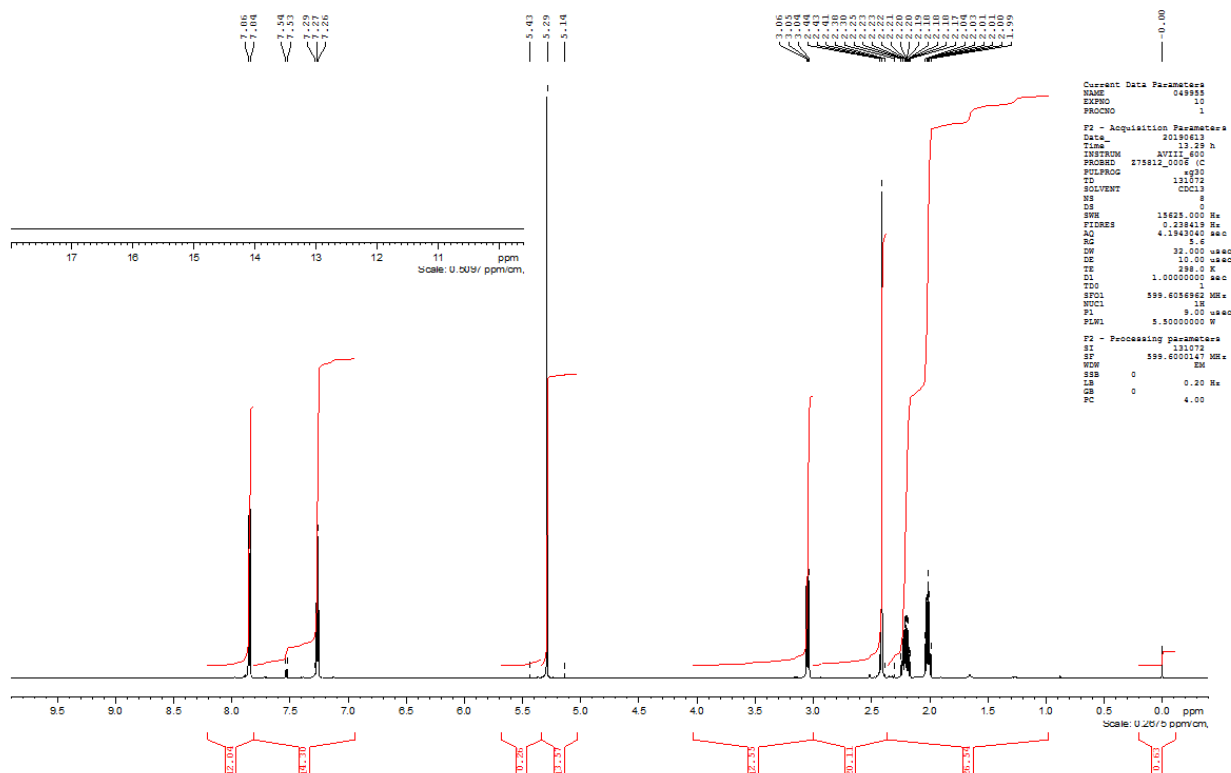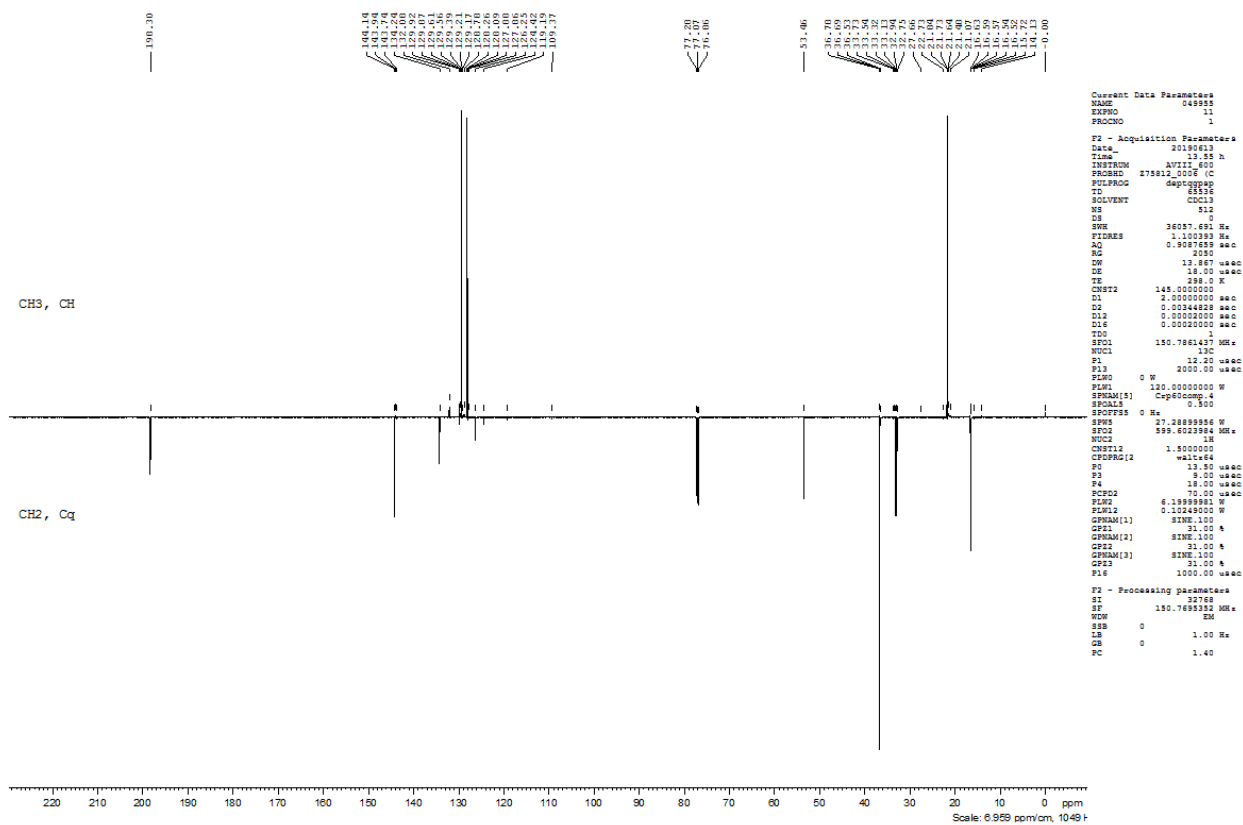

# 1-(4-Chlorophenyl)-5,5,5-trifluoro-pentan-1-one (5g)

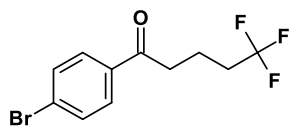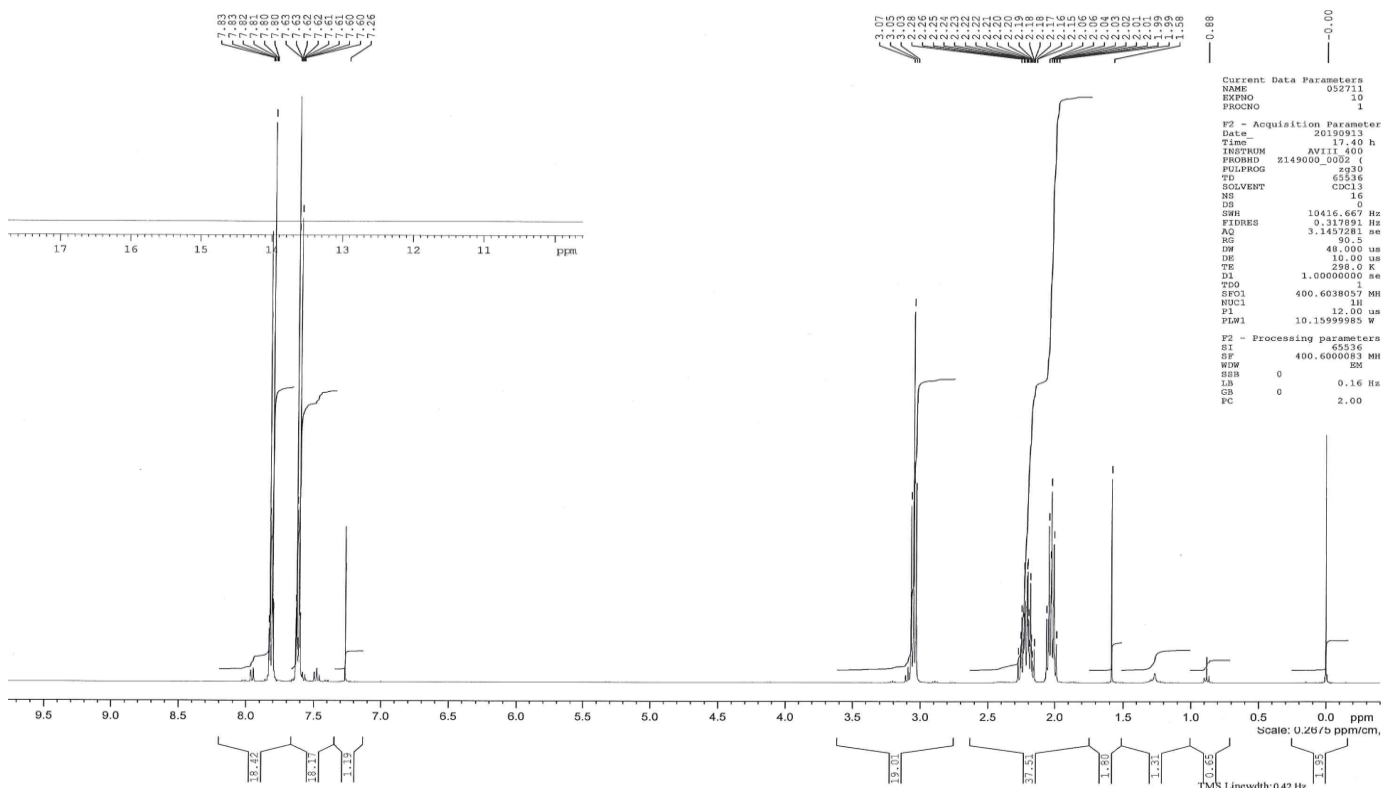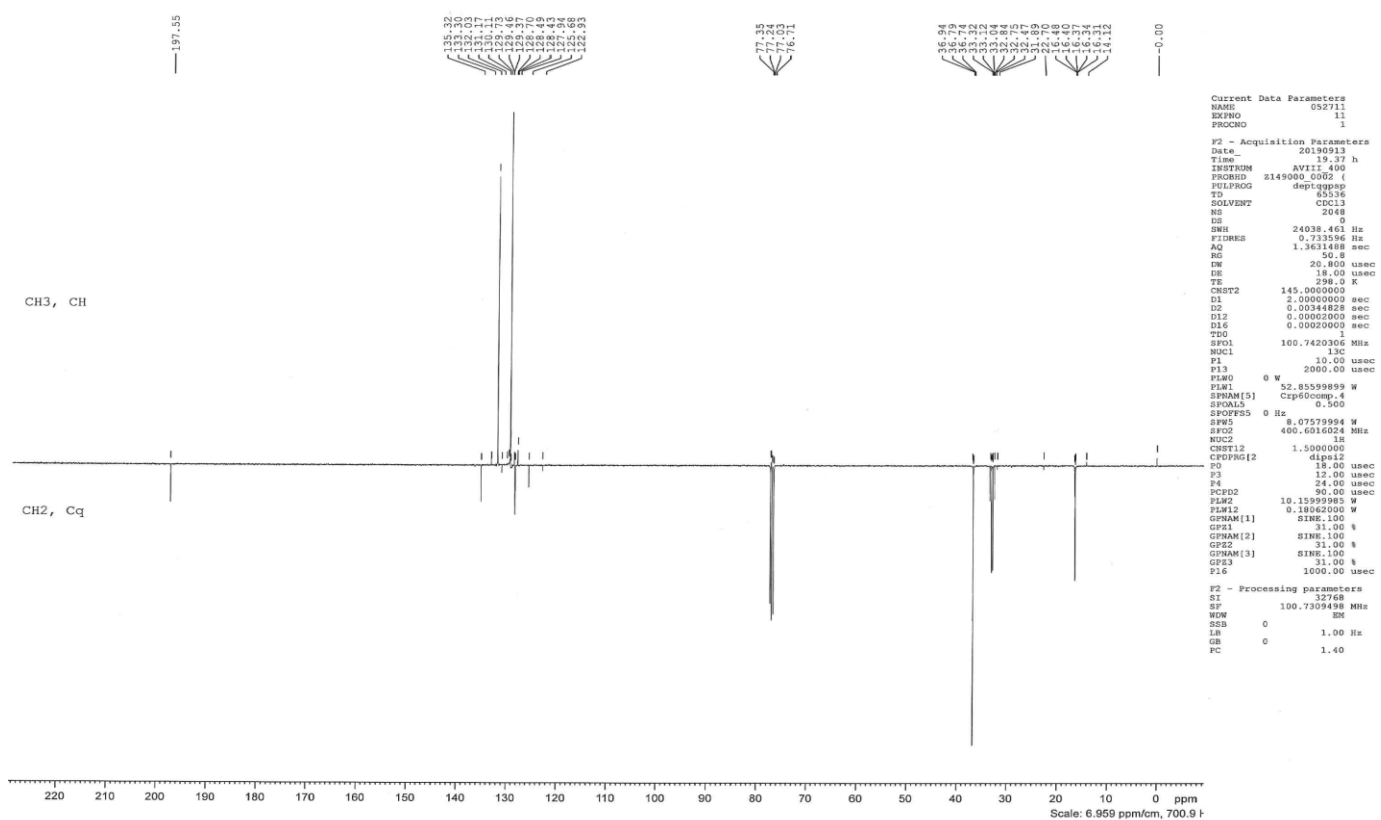



# 5,5-Trifluoro-1-(2-naphthyl)pentan-1-one (5h)

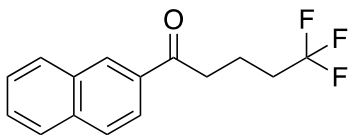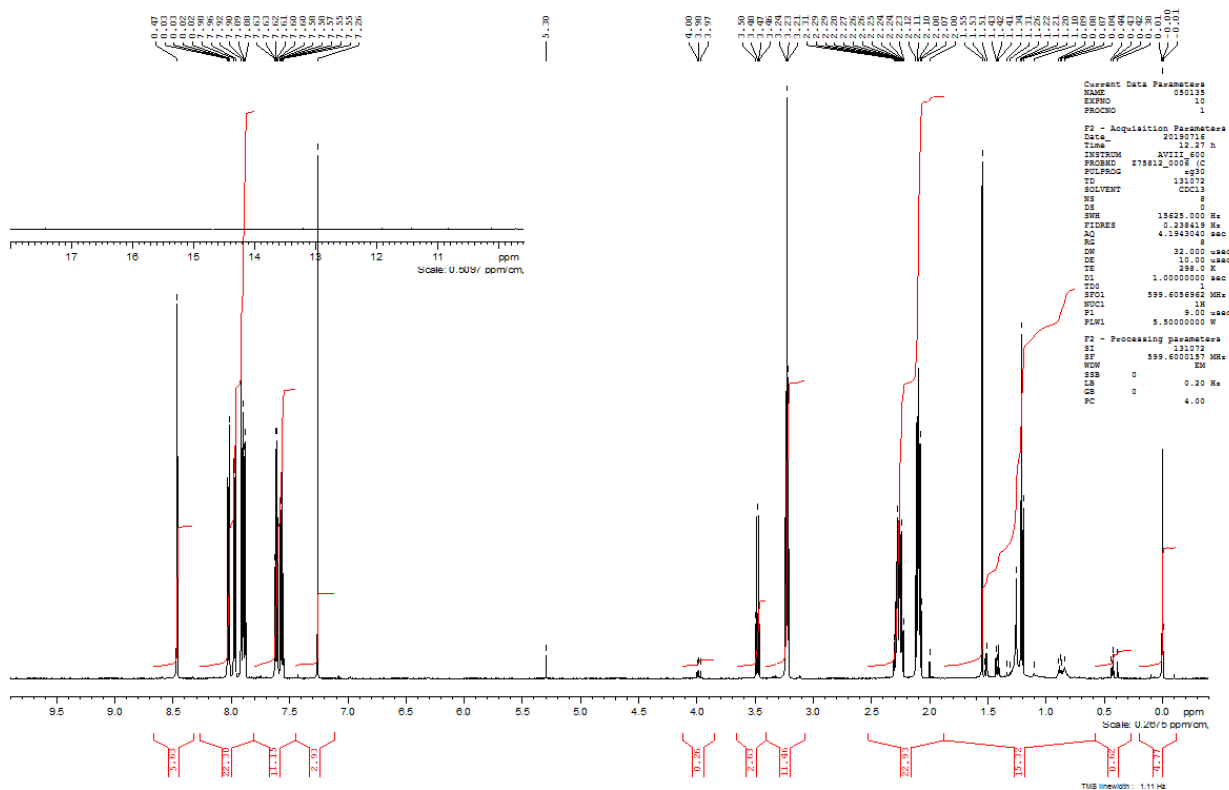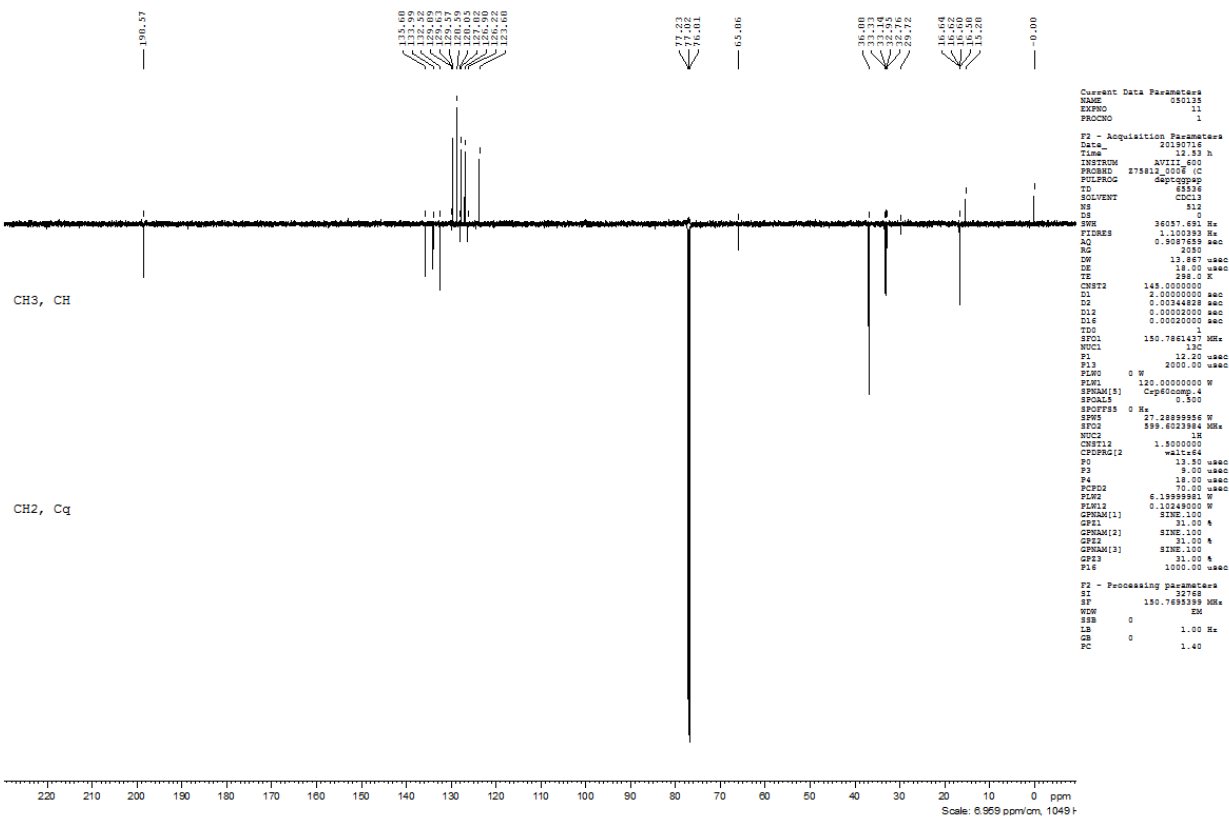

5,5-Trifluoro-1-(2-pyridyl)pentan-1-one (5i)

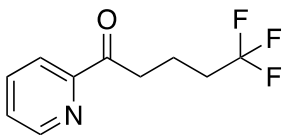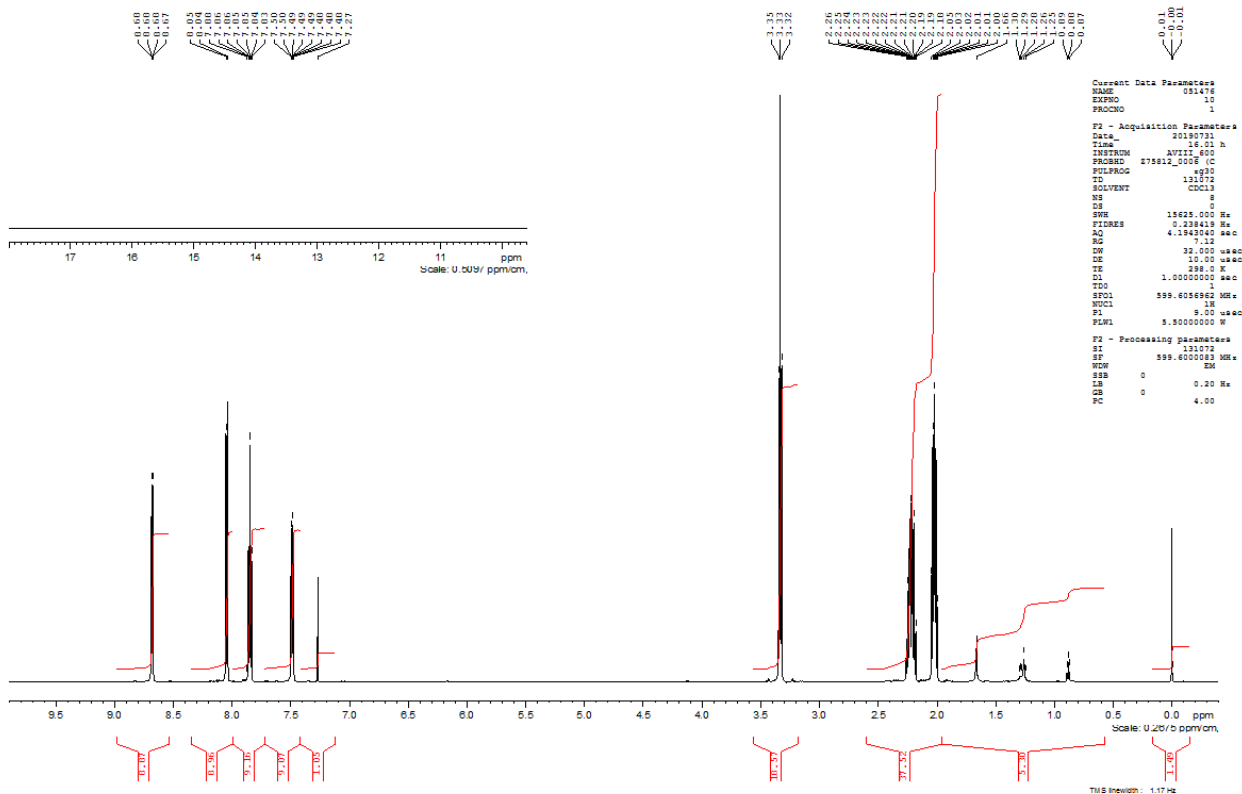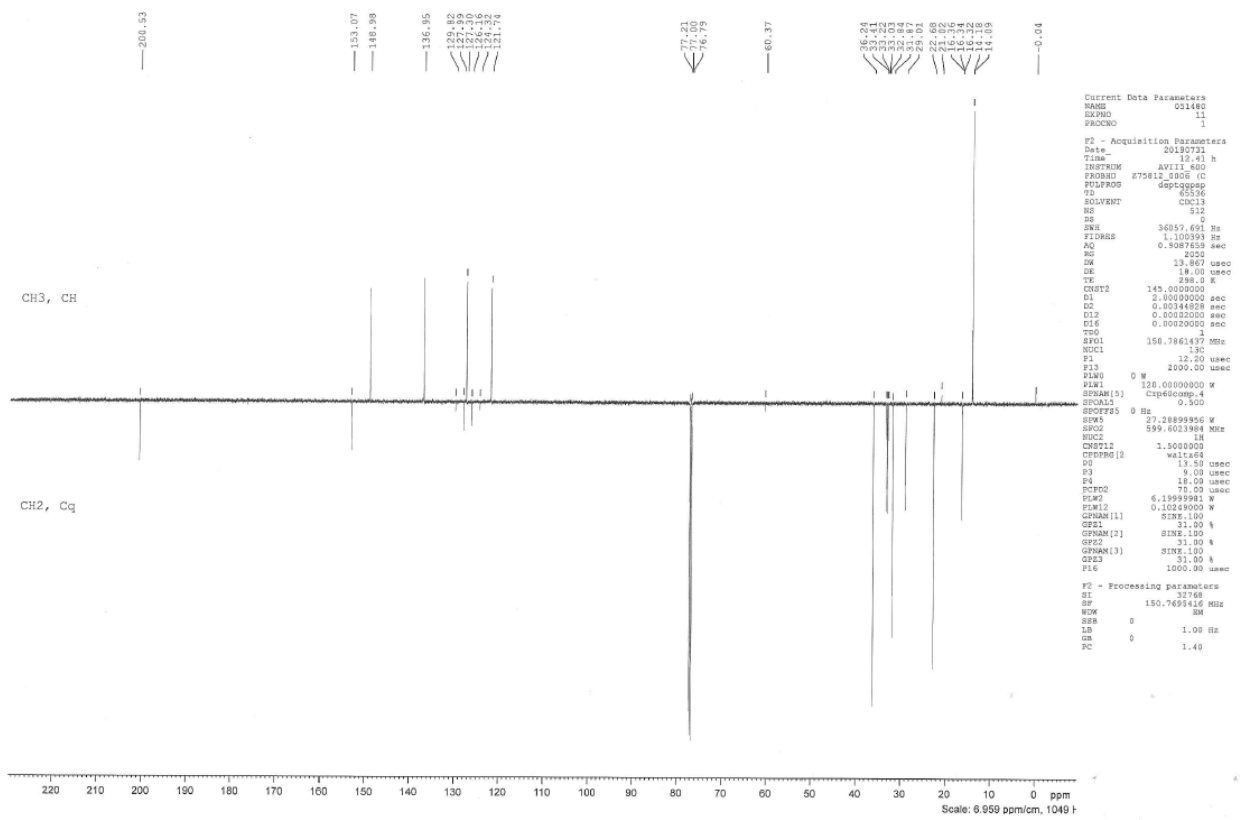

5,5,5-Trifluoro-1-(3-pyridyl)pentan-1-one (5j)

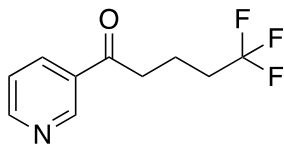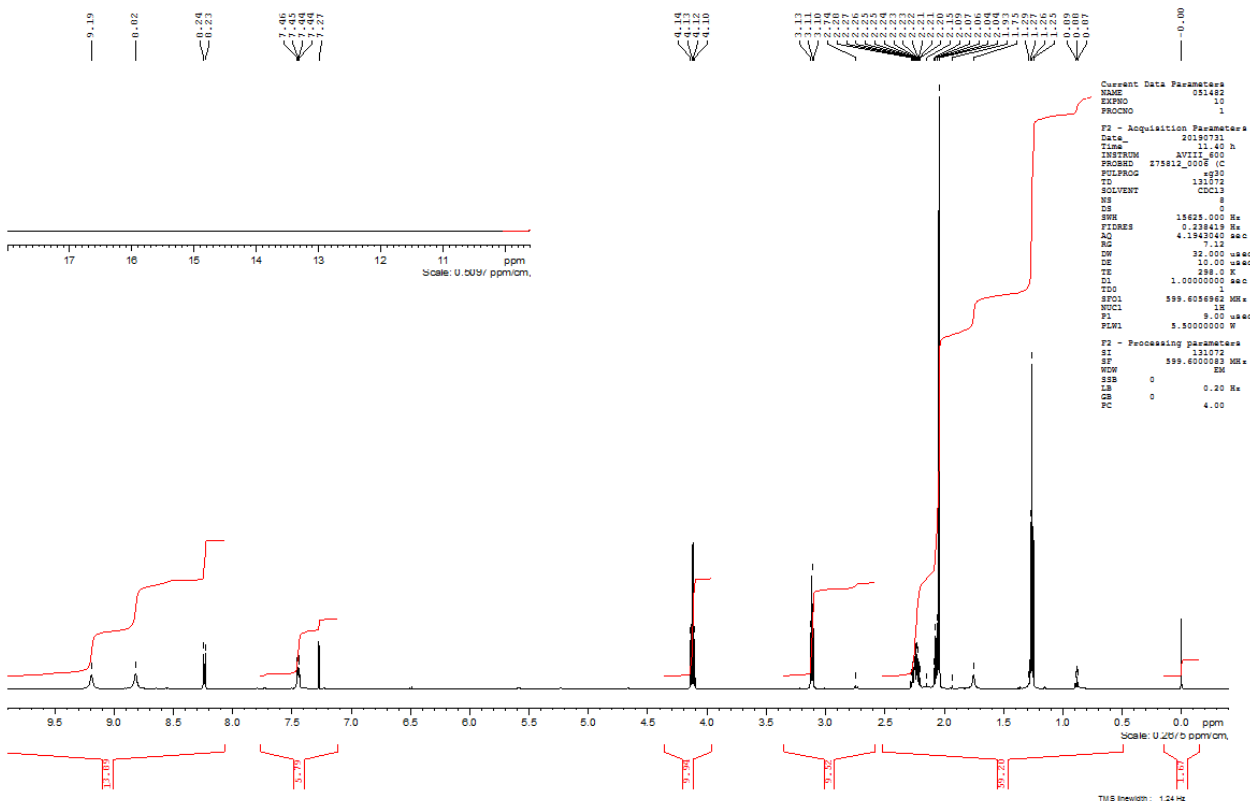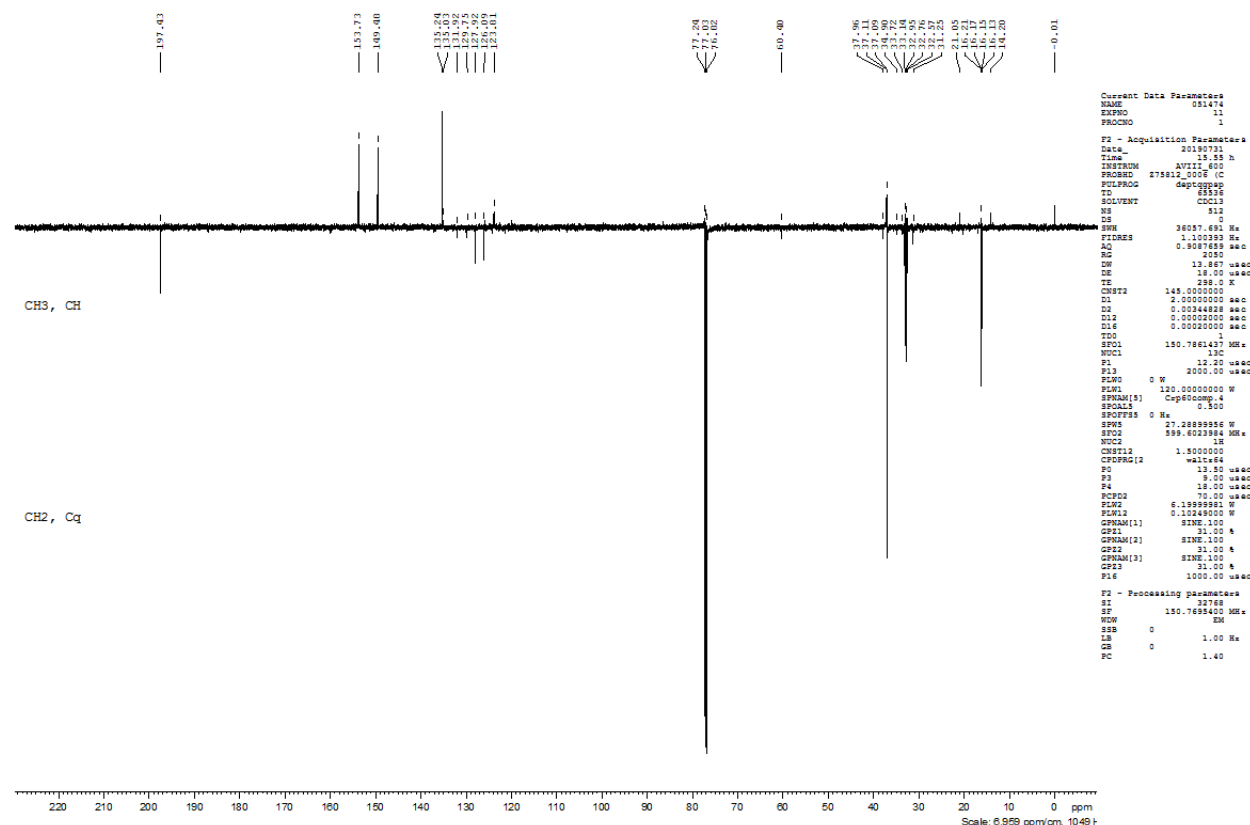

5,5-Trifluoro-1-(4-pyridyl)pentan-1-one (5k)

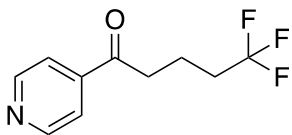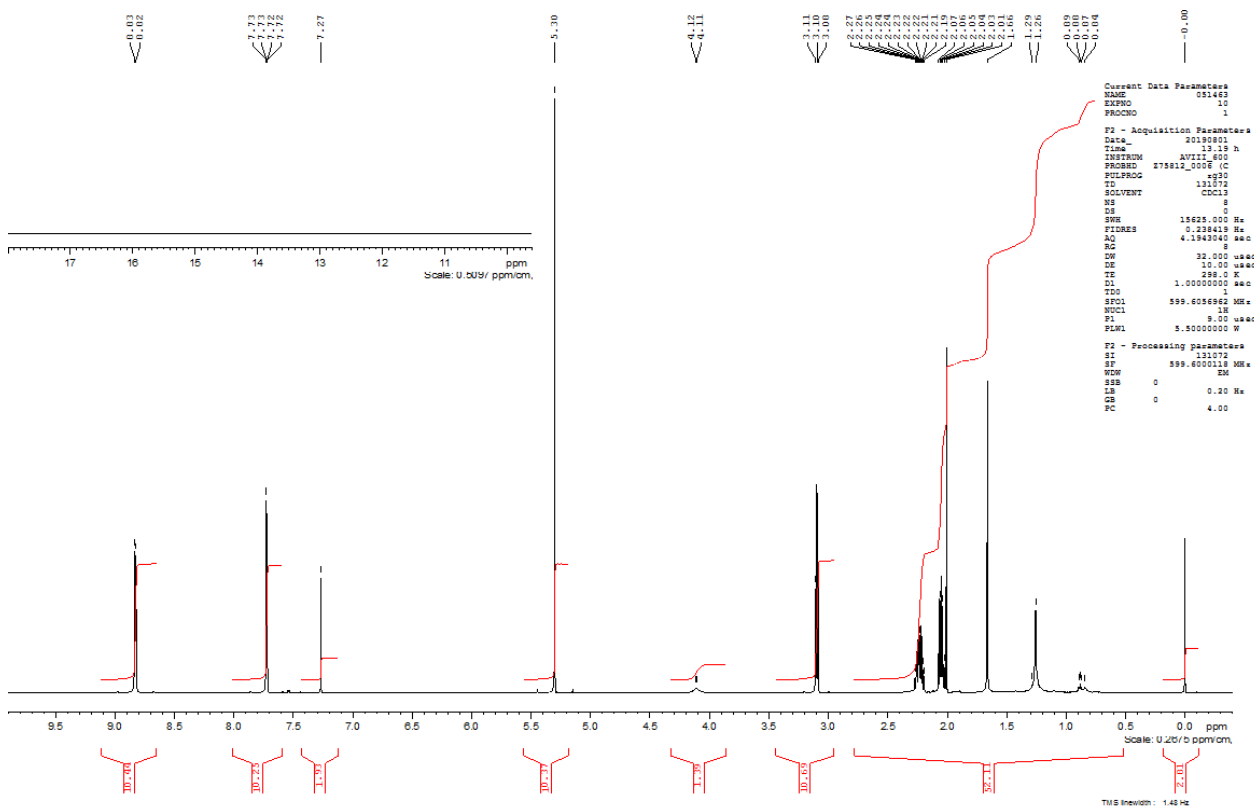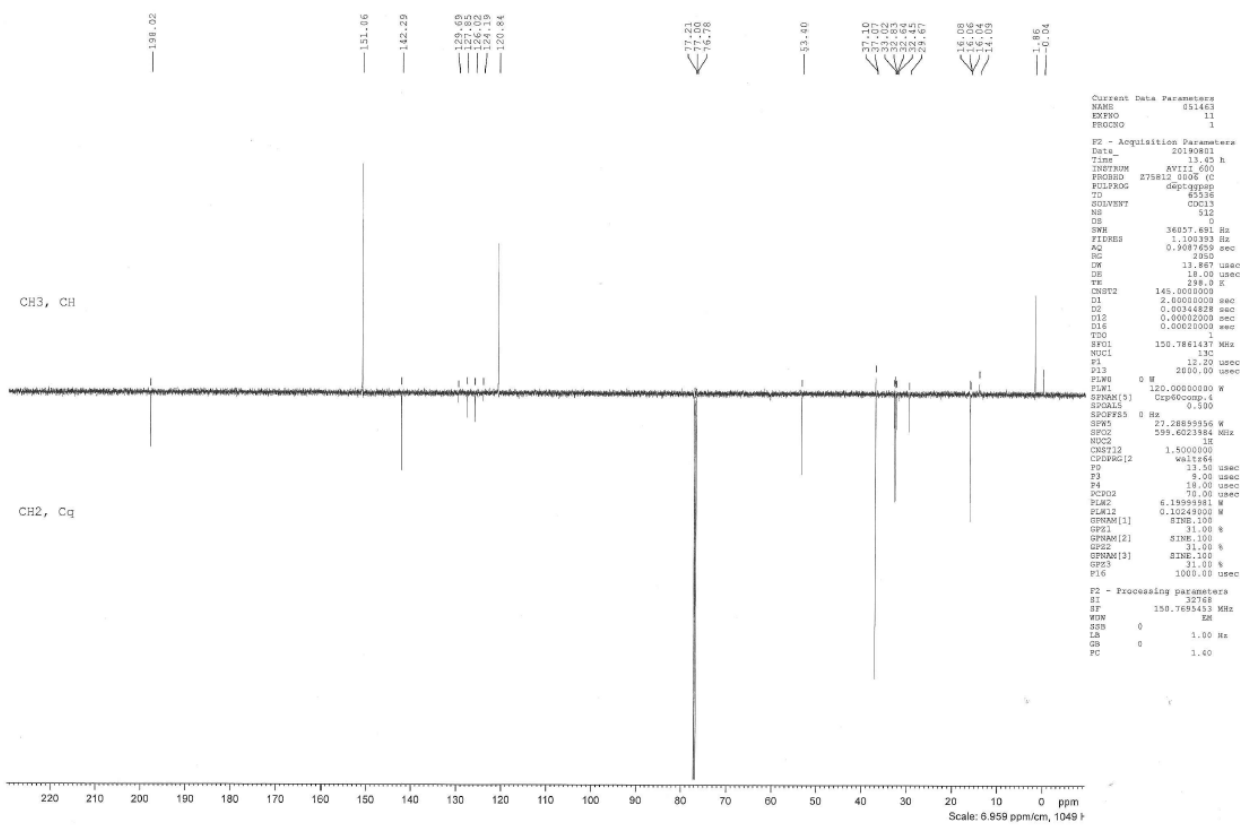

4,4,4-Trifluoro-1-phenyl-butan-1-one (5l)

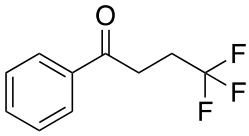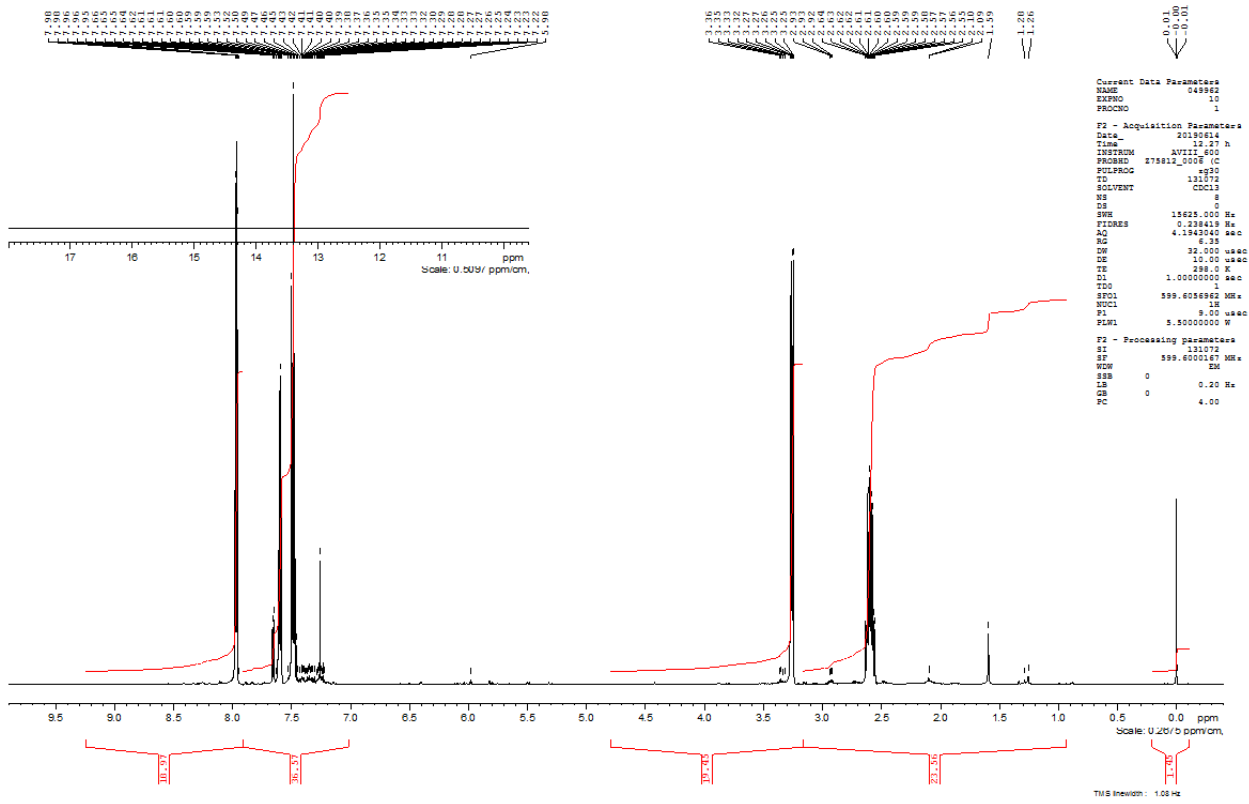

```

Current Data Parameters
NAME      049860
EXPNO    10
PROCNO   1

F2 - Acquisition Parameters
Date_    2019014
Time     11.27 h
INSTRUM  AVIII_600
PROBHD   175812_005 (C
PULPROG  zgpg30
TE       300.2
SOLVENT  CDCl3
NS       8
DS       0
SWH      15623.000 Hz
FIDRES   0.238419 Hz
AQ       4.1942040 sec
RG       61.35
DM       32.000 usec
DE       19.00 usec
TE       298.0 K
D1       1.00000000 sec
TD0      2
SFO1     599.605862 MHz
NUC1     13
P1       9.00 usec
PCPL1    5.50000000 W

F2 - Processing Parameters
SI       131072
SF       599.600047 MHz
WDW      EM
SS       0
SB       0.20 Hz
GB       0
PC       4.00
    
```

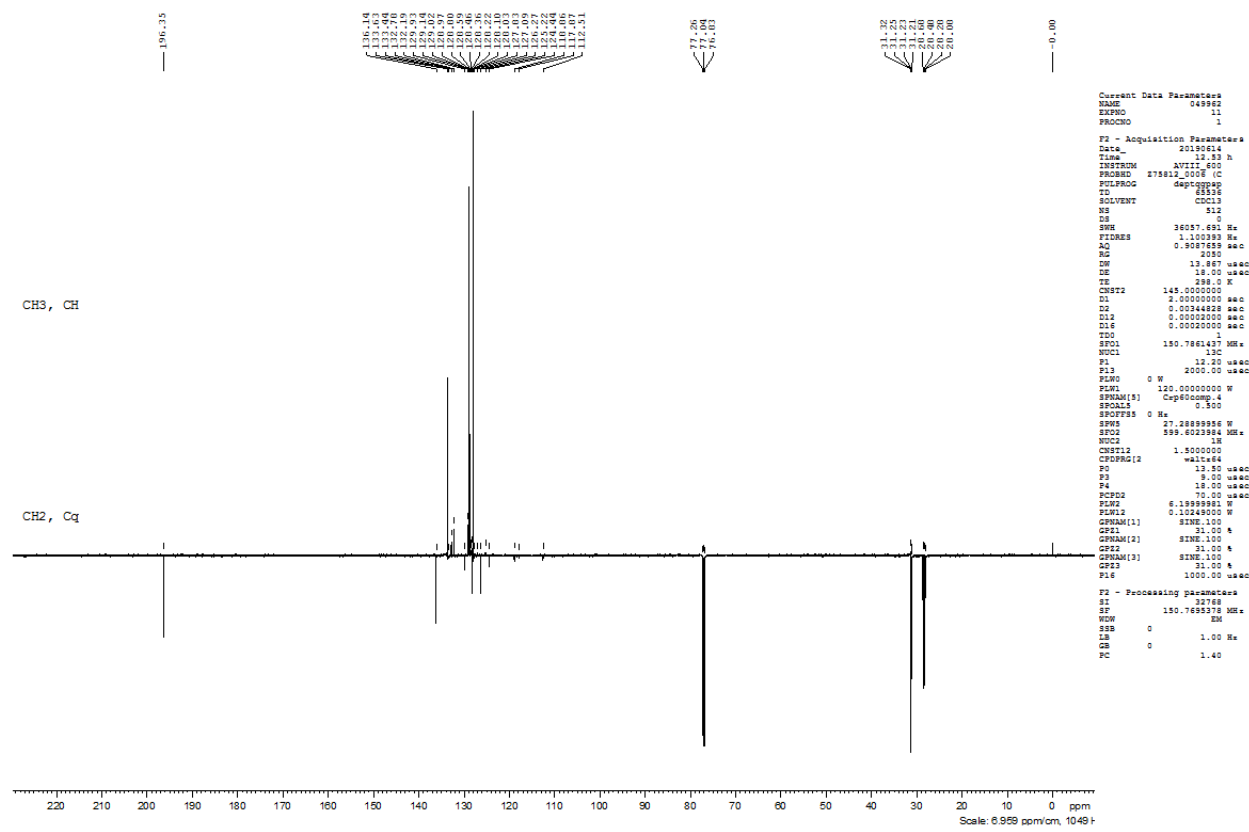

```

Current Data Parameters
NAME      049862
EXPNO    11
PROCNO   1

F2 - Acquisition Parameters
Date_    2019014
Time     11.53 h
INSTRUM  AVIII_600
PROBHD   175812_005 (C
PULPROG  zgpg30
TE       300.2
SOLVENT  CDCl3
NS       812
DS       0
SWH      36057.490 Hz
FIDRES   1.100393 Hz
AQ       0.8087659 sec
RG       2051
DM       13.867 usec
DE       18.00 usec
TE       298.0 K
D1       145.000000 sec
D11      2.00000000 sec
D12      0.00244820 sec
D13      0.00000000 sec
D14      0.00000000 sec
TD0      0.00000000 sec
SFO1     150.7841437 MHz
NUC1     13
P1       12.20 usec
PCPL1    2000.00 usec
PLNG     0 W
FLM0     110.0000000 W
SFOA0(5) Cp600omp_4
SFOA0(5) 0 Hz
SFOA0(5) 0 Hz
SFOA0(5) 21.3888888 MHz
SFOA0(5) 599.6023984 MHz
NUC2     19
PCPL2    1.50000000
CHST12  waltz164
P2       12.50 usec
P3       9.00 usec
P4       15.00 usec
PCPL2    70.00 usec
PLM0     0.10248000 W
PLM1     0.10248000 W
CPHSM(1) SINE_100
CPHSM(2) SINE_100
CPHSM(3) SINE_100
CPHSM(4) SINE_100
P16      1000.00 usec

F2 - Processing parameters
SI       32768
SF       150.788378 MHz
WDW      EM
SS       0
SB       1.00 Hz
GB       0
PC       1.40
    
```

CH3, CH

CH2, Cq

5,5-Trifluoro-1-(4-methoxyphenyl)pentan-1-one (5m)

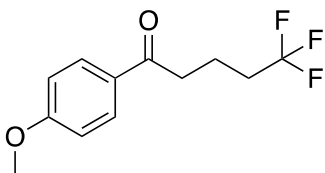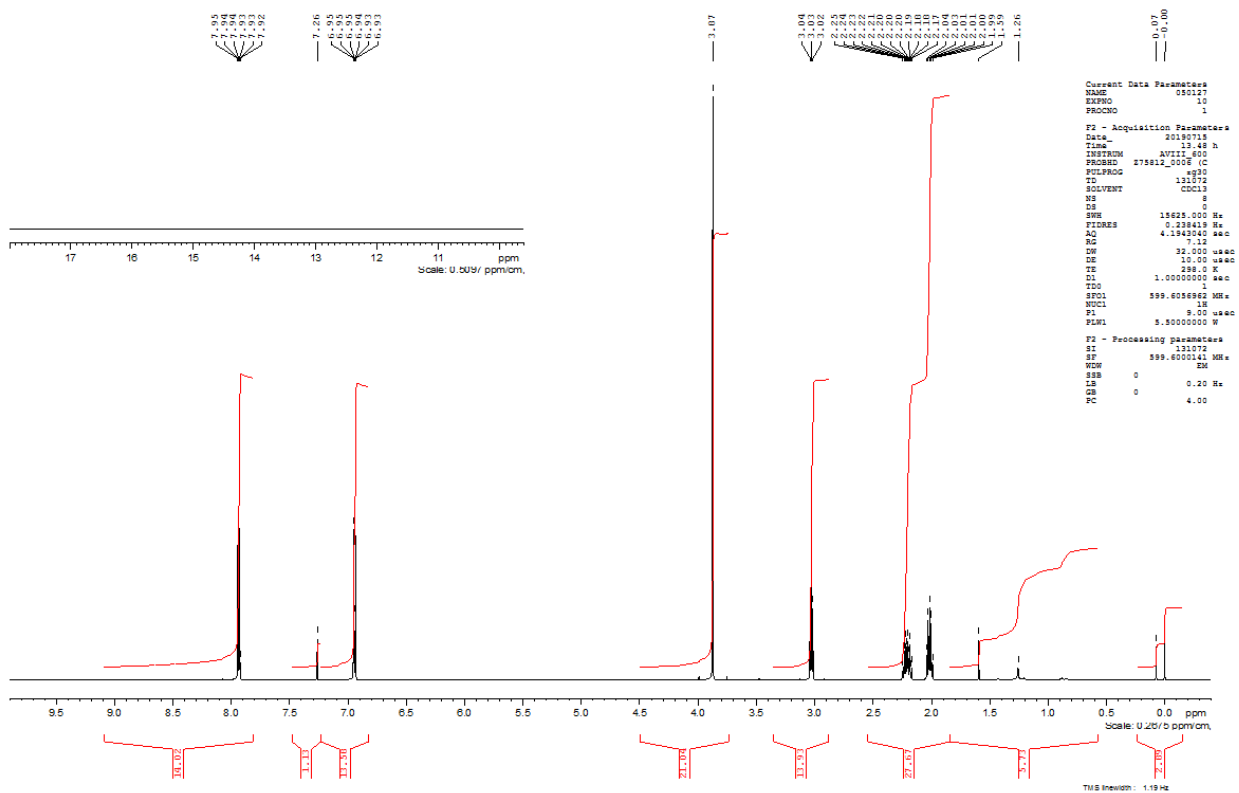

```

Current Data Parameters
NAME      050127
EXPNO     10
PROCNO    1
-----
F2 - Acquisition Parameters
Date_     20190715
Time      13.48 h
INSTRUM   AVIII_600
PROBHD    5mmB1H2_0008 (C
PULPROG   zgpg30
TD         131572
SOLVENT   CDCl3
NS         8
DS         0
SWH        16629.000 Hz
FIDRES     0.228419 Hz
AQ          4.184240 sec
RG          7.12
DE         32.000 usec
TE         298.2 K
D1         1.00000000 sec
T1         2.00
SFO1       599.6086962 MHz
NUC1       13C
PC         9.00 usec
PL1        0.0000000 W
PL12       5.80000000 W
-----
F2 - Processing parameters
SI         131072
SF         599.600141 MHz
WDW        EM
SSB         0
GB          0
CB          0
PC         4.00
    
```

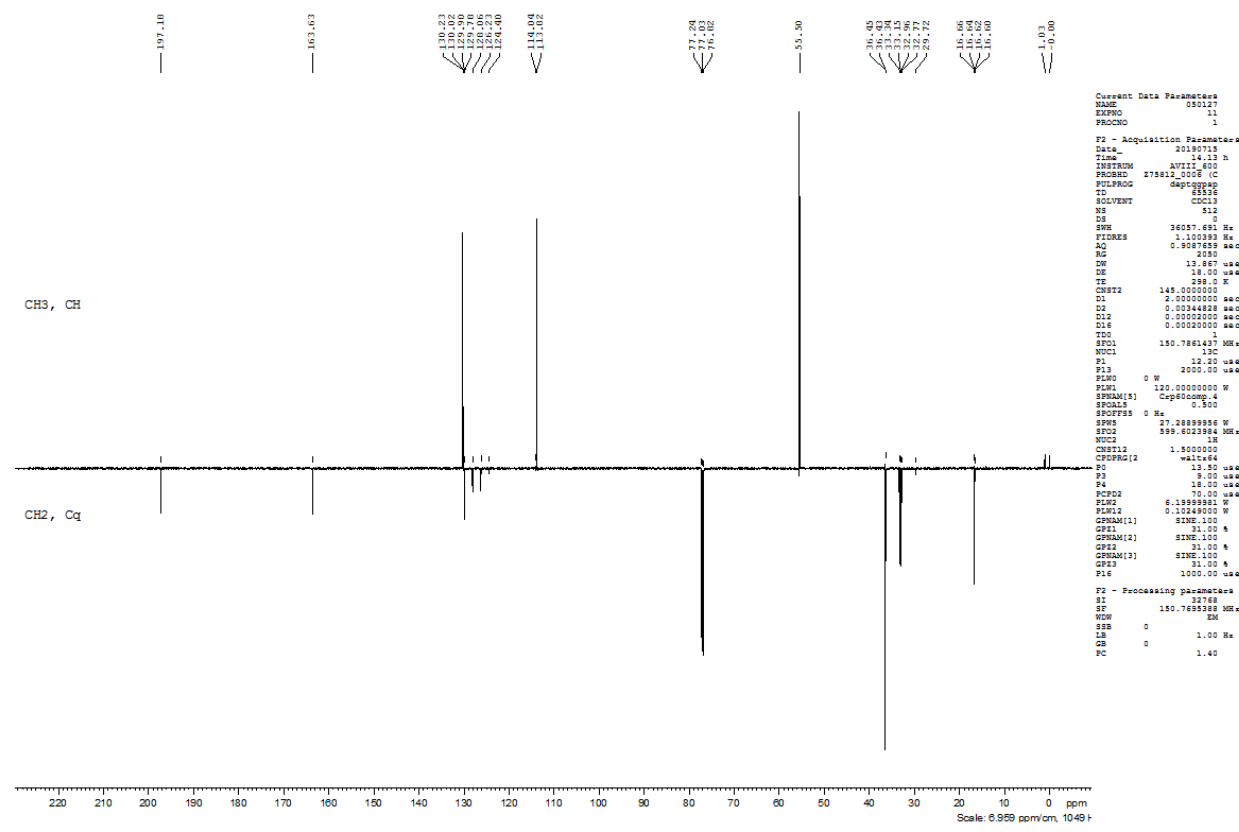

```

Current Data Parameters
NAME      050127
EXPNO     12
PROCNO    1
-----
F2 - Acquisition Parameters
Date_     20190715
Time      14.13 h
INSTRUM   AVIII_600
PROBHD    5mmB1H2_0008 (C
PULPROG   zgpg30
TD         65536
SOLVENT   CDCl3
NS         8
DS         0
SWH        26087.000 Hz
FIDRES     1.100393 Hz
AQ          0.9087659 sec
RG          3.00
DE         13.887 usec
TE         298.2 K
CH2F2     149.0000000 sec
D1         2.00000000 sec
D2         0.00044889 sec
D12        0.00020000 sec
D16        0.00020000 sec
T10        0.00020000 sec
SFO1       150.788437 MHz
NUC1       13C
PC         12.20 usec
PL1        2000.00 usec
PL12       0 W
PL16       0 W
PULSE1     120.0000000 W
SFRAM(1)   Cap80comp.4
SFRAM(2)   0.500
SFRAM(3)   0 Hz
SFRAM(4)   0 Hz
SFRAM(5)   27.28899996 W
SFRAM(6)   298.4002986 MHz
NUC2       1H
CH2F2     1.80000000
CPDPRG2    waltz164
PC         12.50 usec
P2         9.00 usec
P4         18.00 usec
PCPD2      70.00 usec
PL12       6.19999988 W
PULSE2     0.10248000 W
CPDPRAM(1) SINE.100
CPDPRAM(2) SINE.100
CPDPRAM(3) SINE.100
CPDPRAM(4) SINE.100
CPDPRAM(5) SINE.100
PL6        1000.00 usec
-----
F2 - Processing parameters
SI         32768
SF         150.788438 MHz
WDW        EM
SSB         0
GB          0
CB          0
PC         1.40
    
```

CH3, CH

CH2, Cq

5,5-Dichloro-1-(2-methoxyphenyl)pent-4-en-1-one (6a)

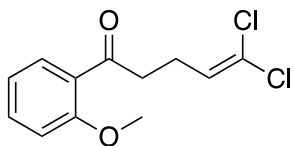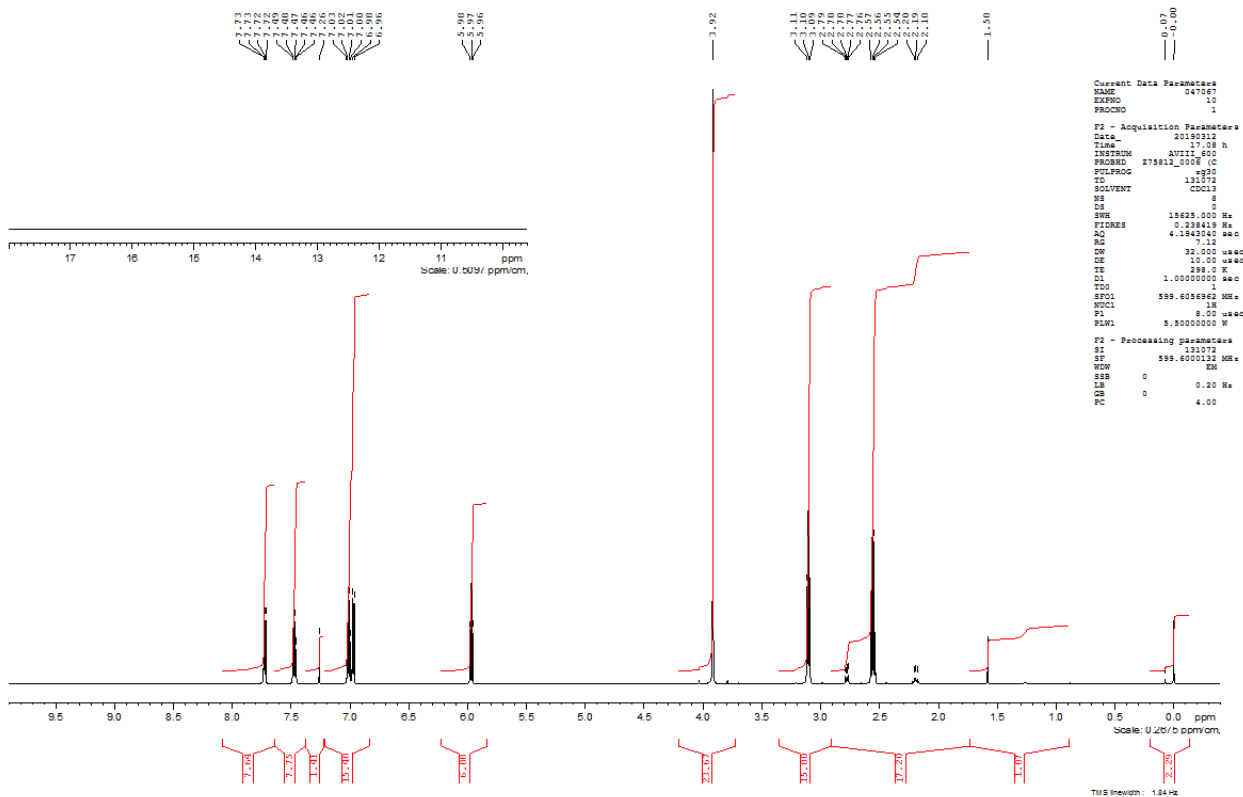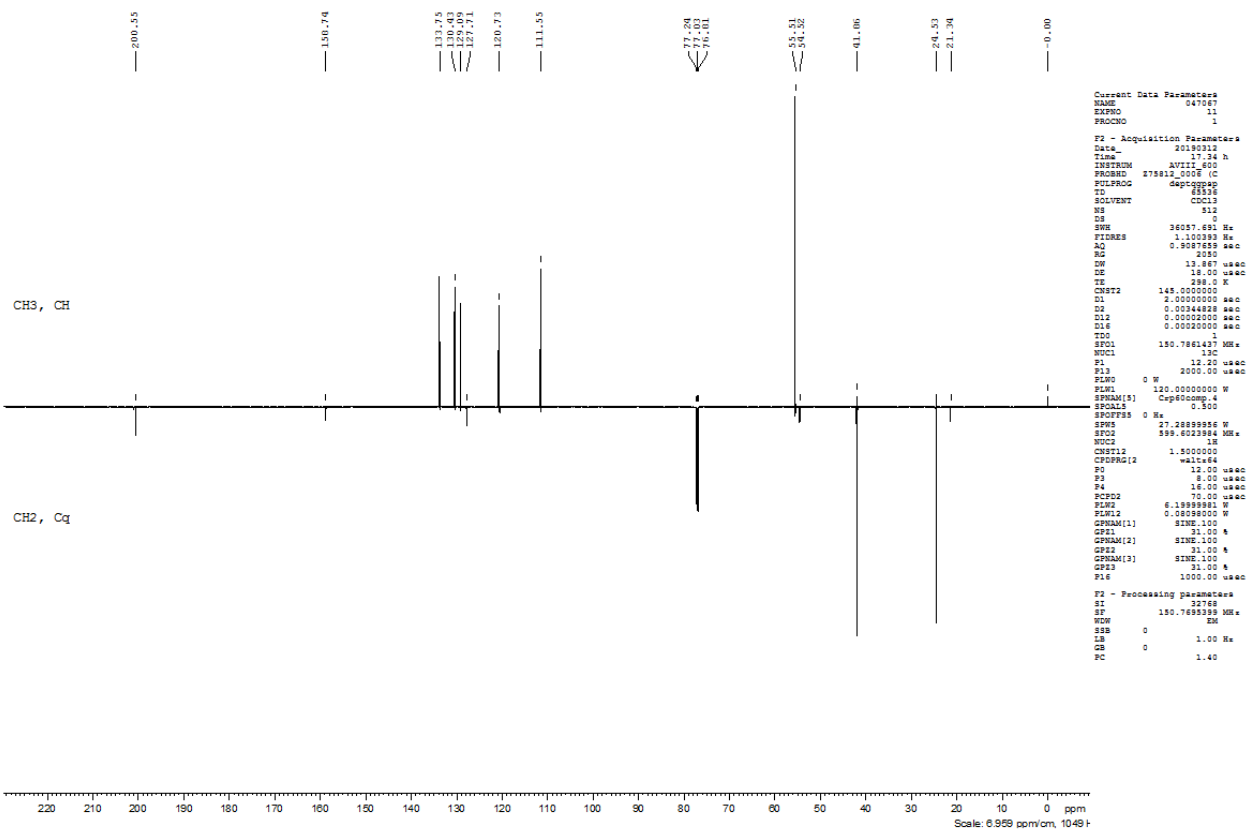

5,5-Dichloro-1-(3-methoxyphenyl)pent-4-en-1-one (6b)

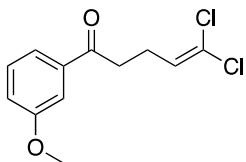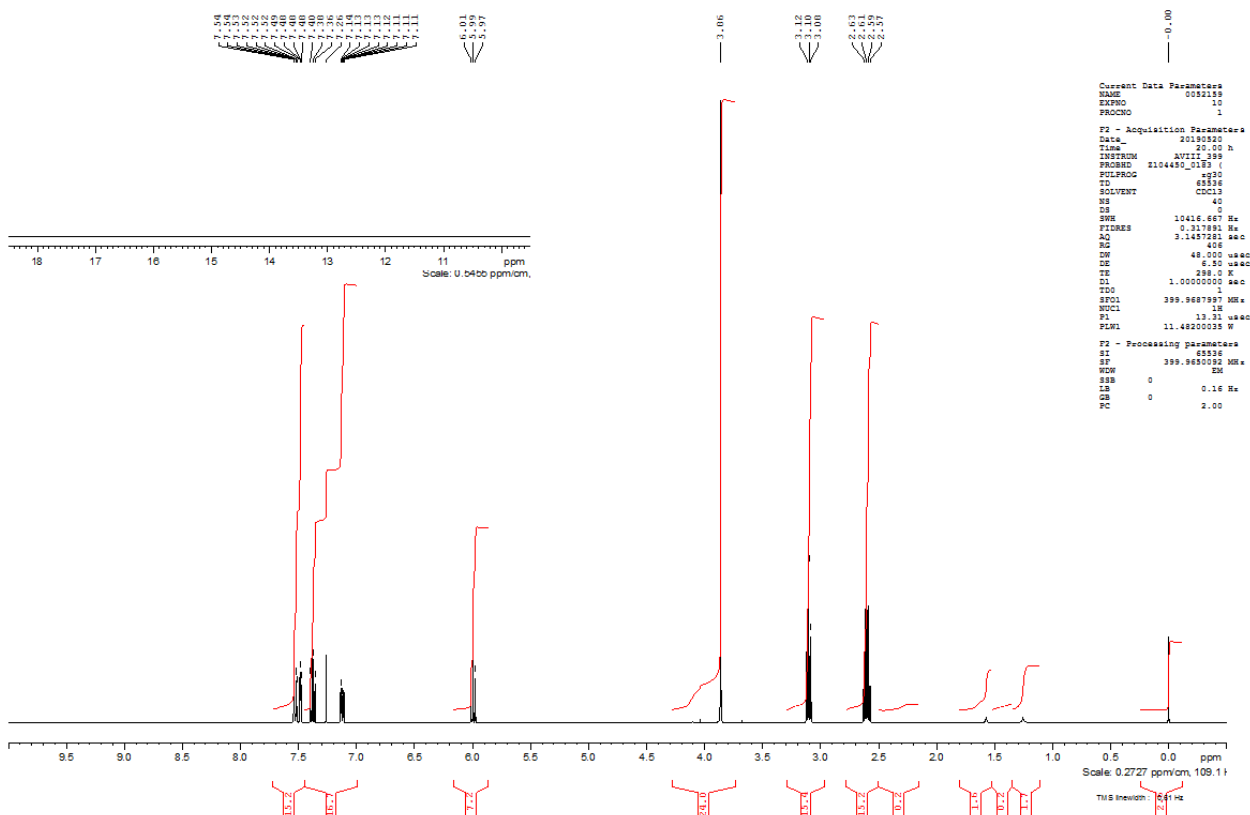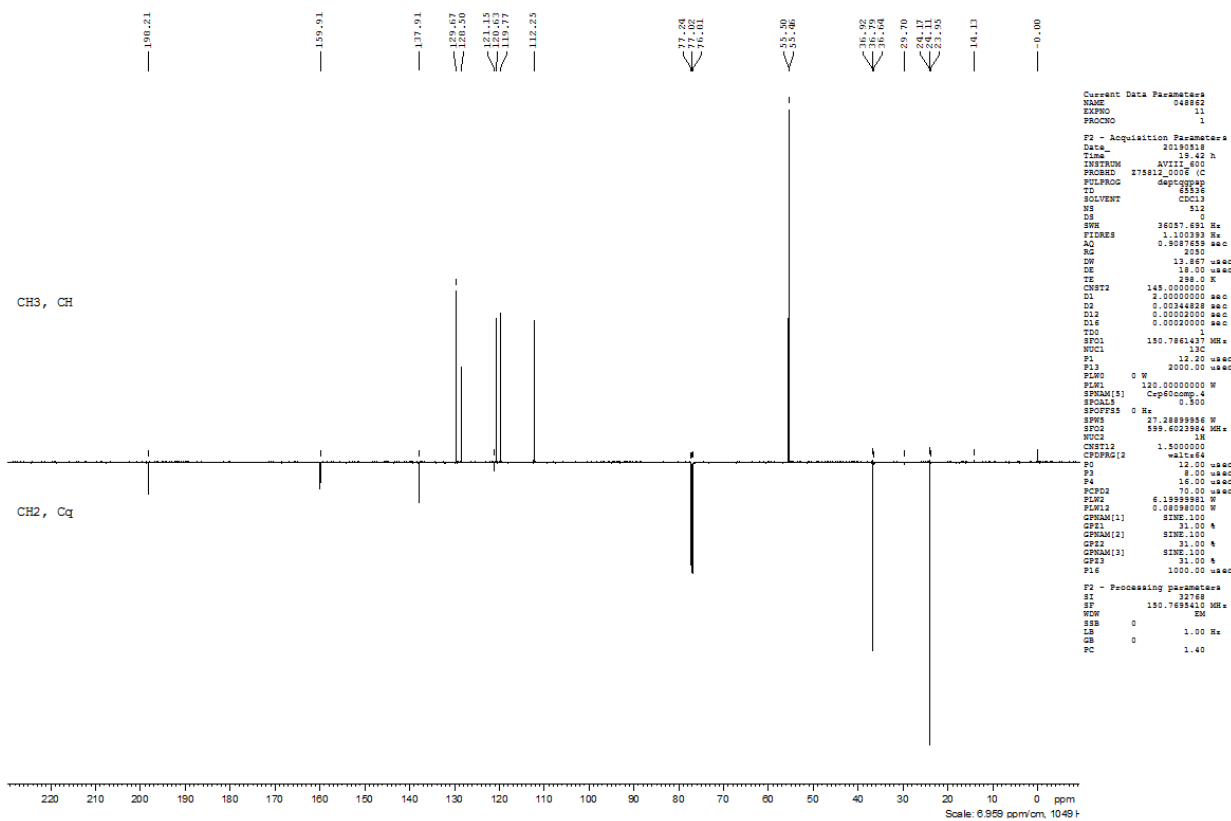



5,5-Trichloro-1-(3-methoxyphenyl)pentan-1-one (8b)

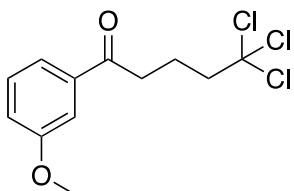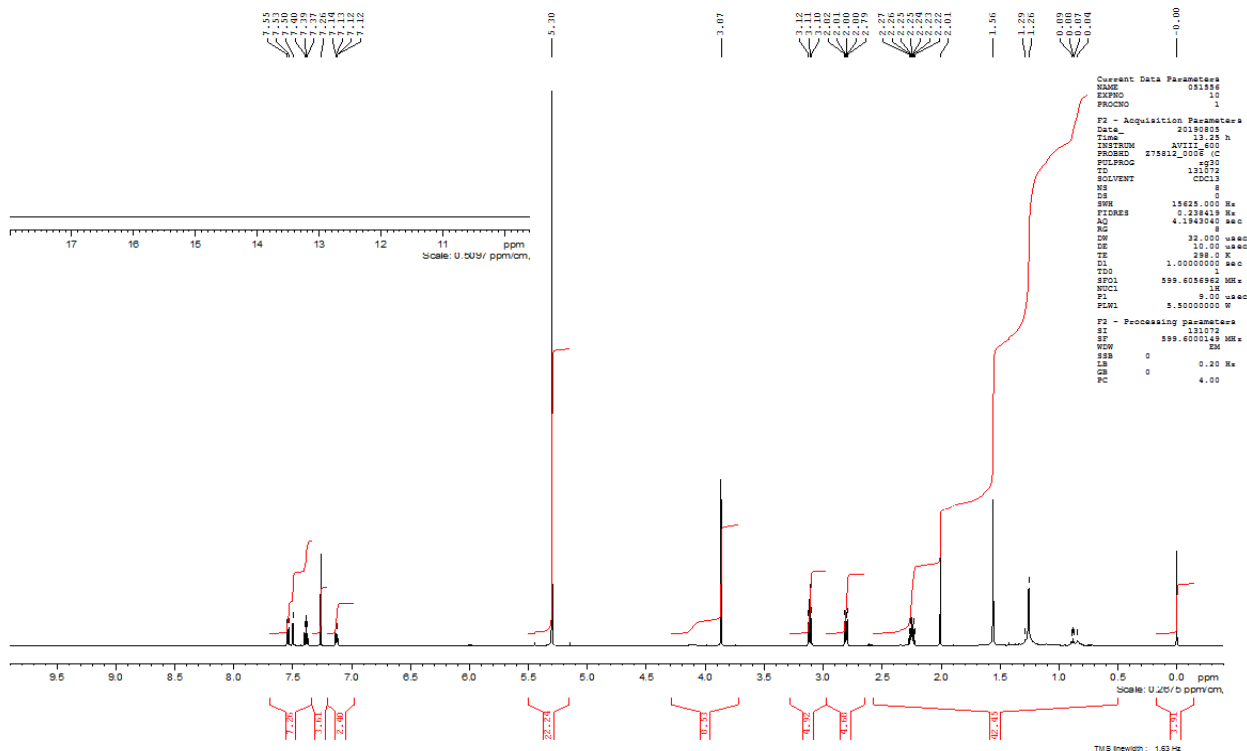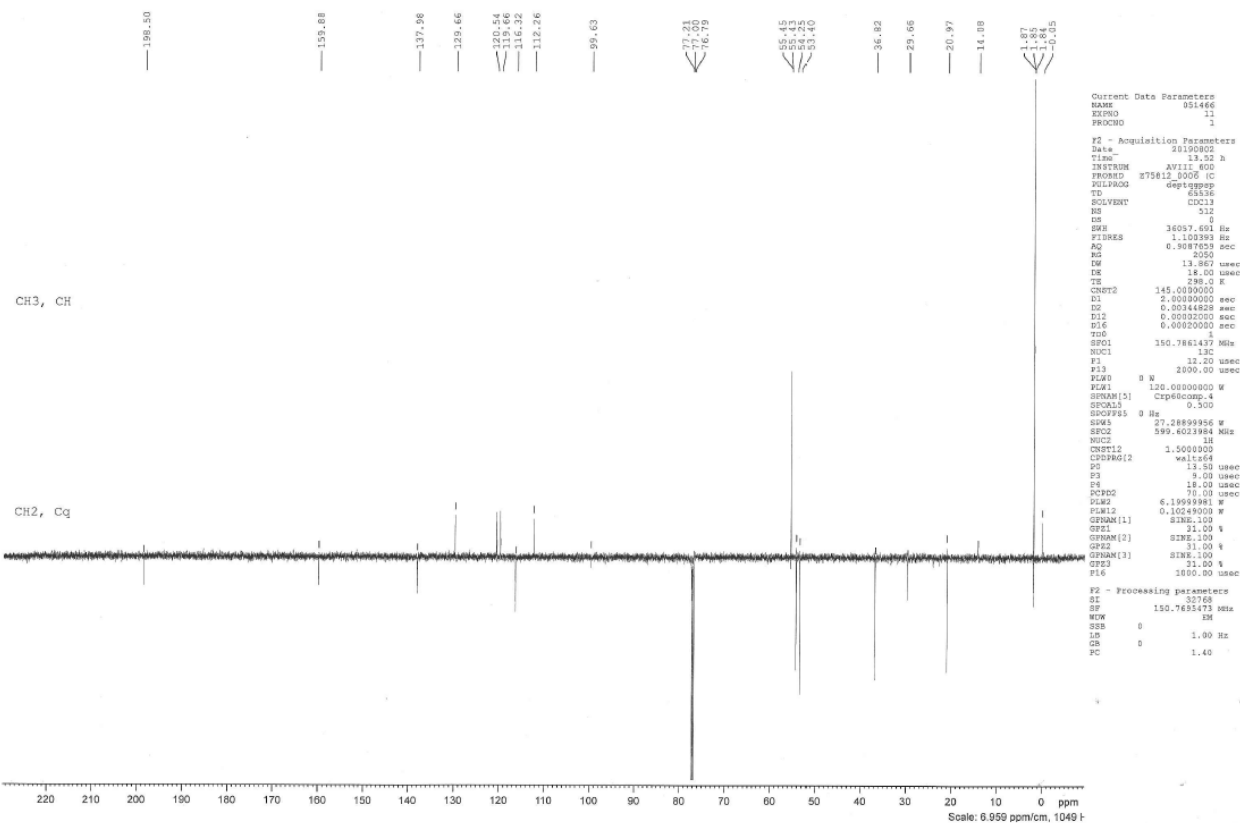

# 5,5-Dichloro-1-phenyl-pent-4-en-1-one (6c)

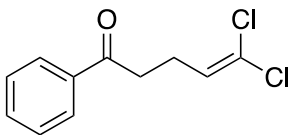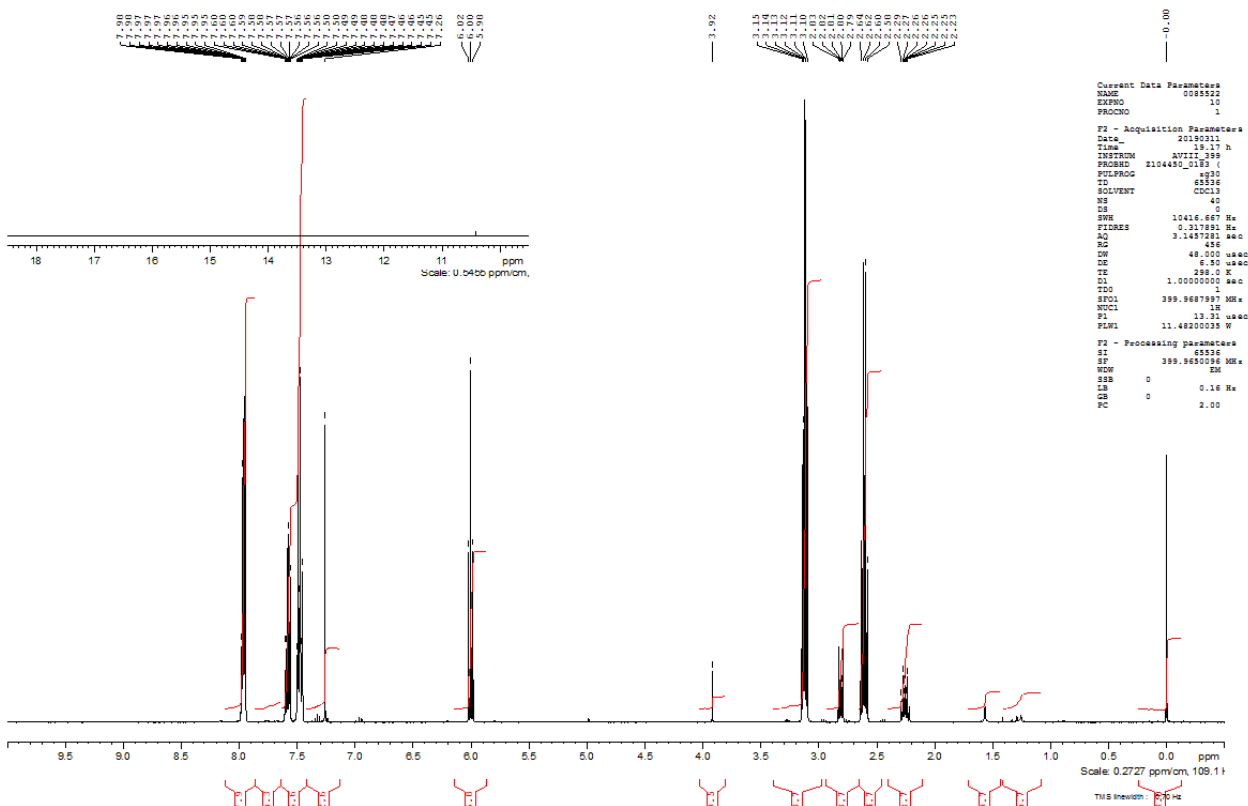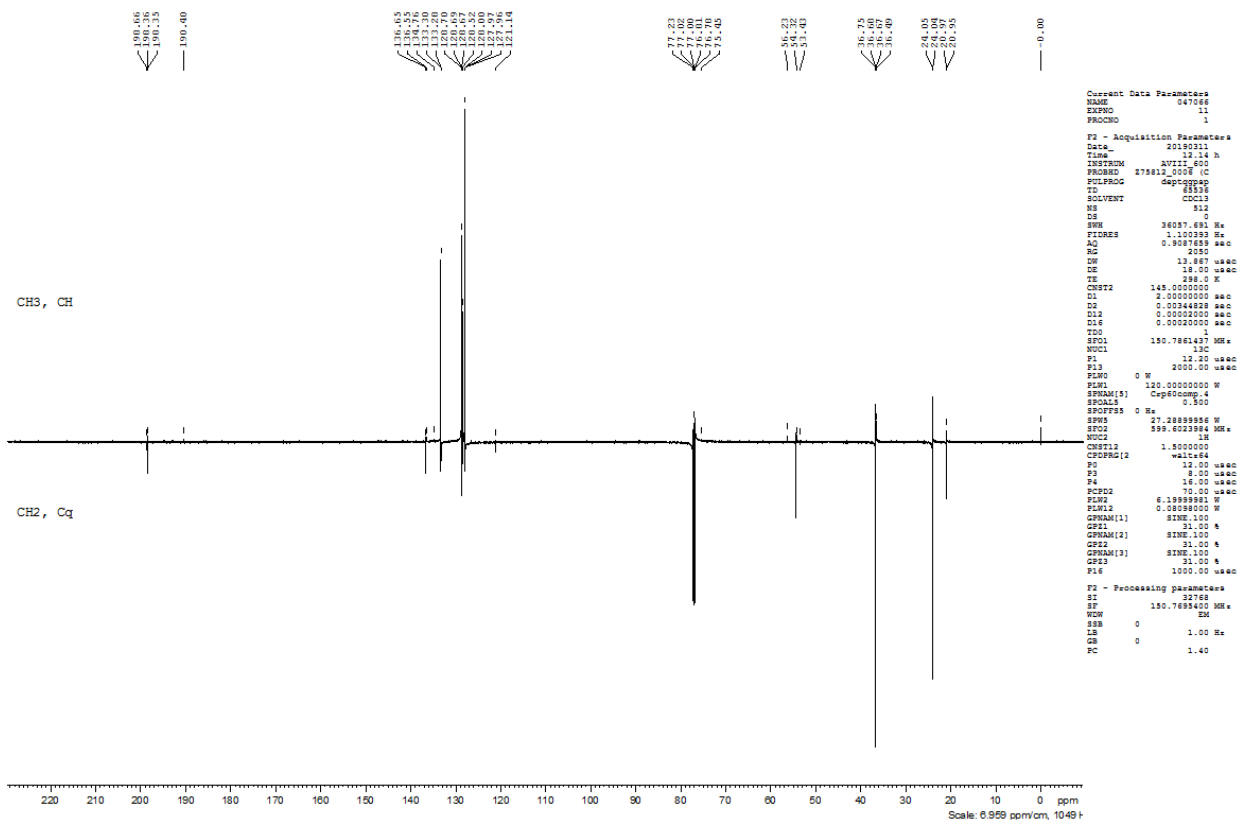

5,5-Dichloro-1-(4-chlorophenyl)pent-4-en-1-one (6d)

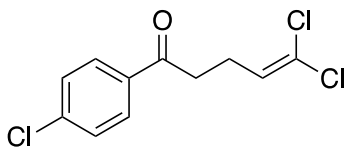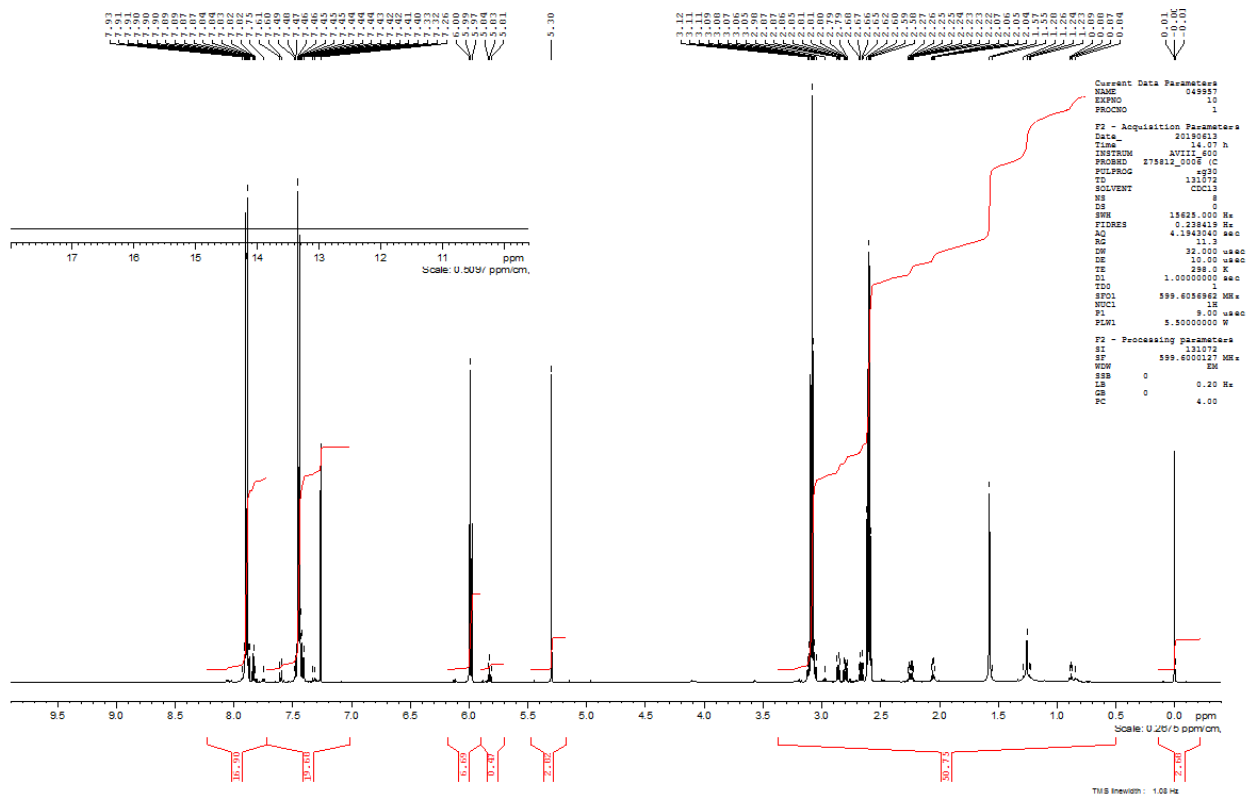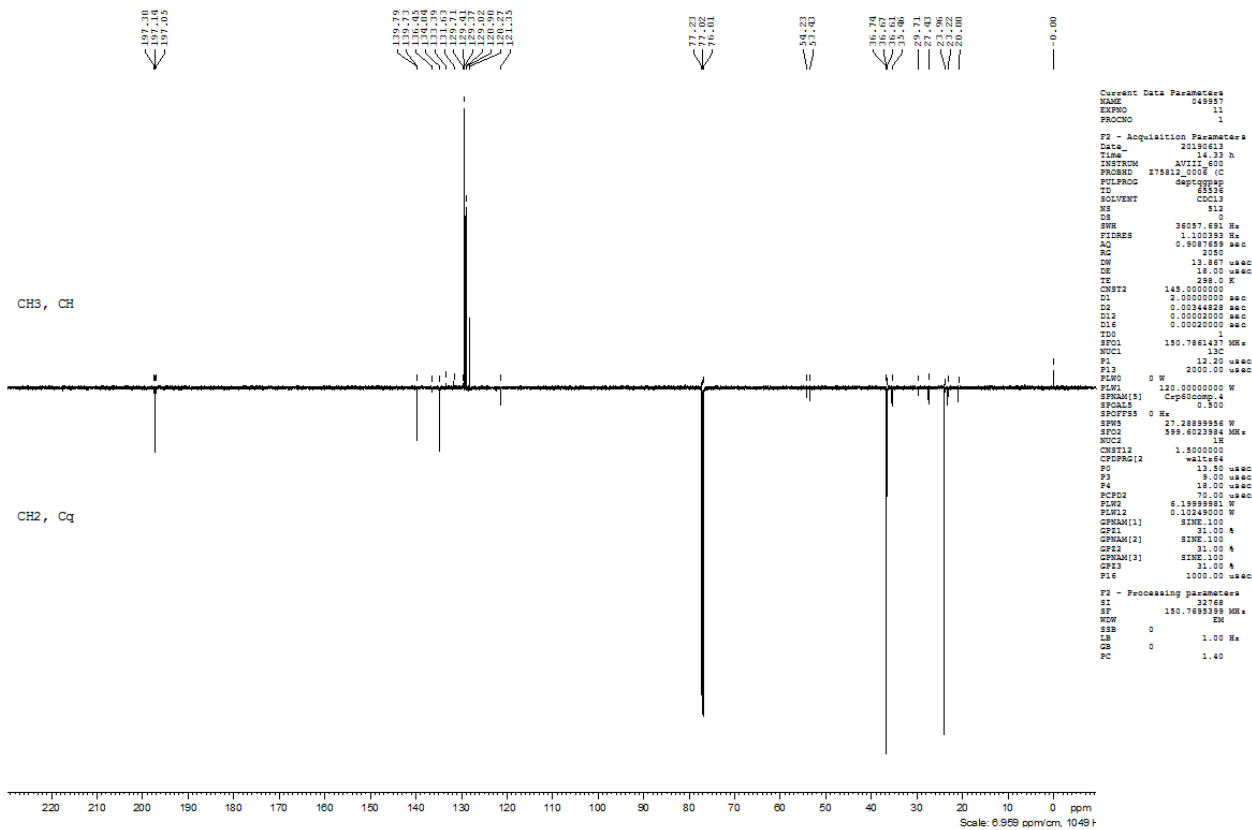

5,5-Dichloro-1-(2-chlorophenyl)pent-4-en-1-one (6e)

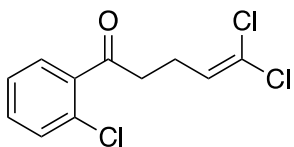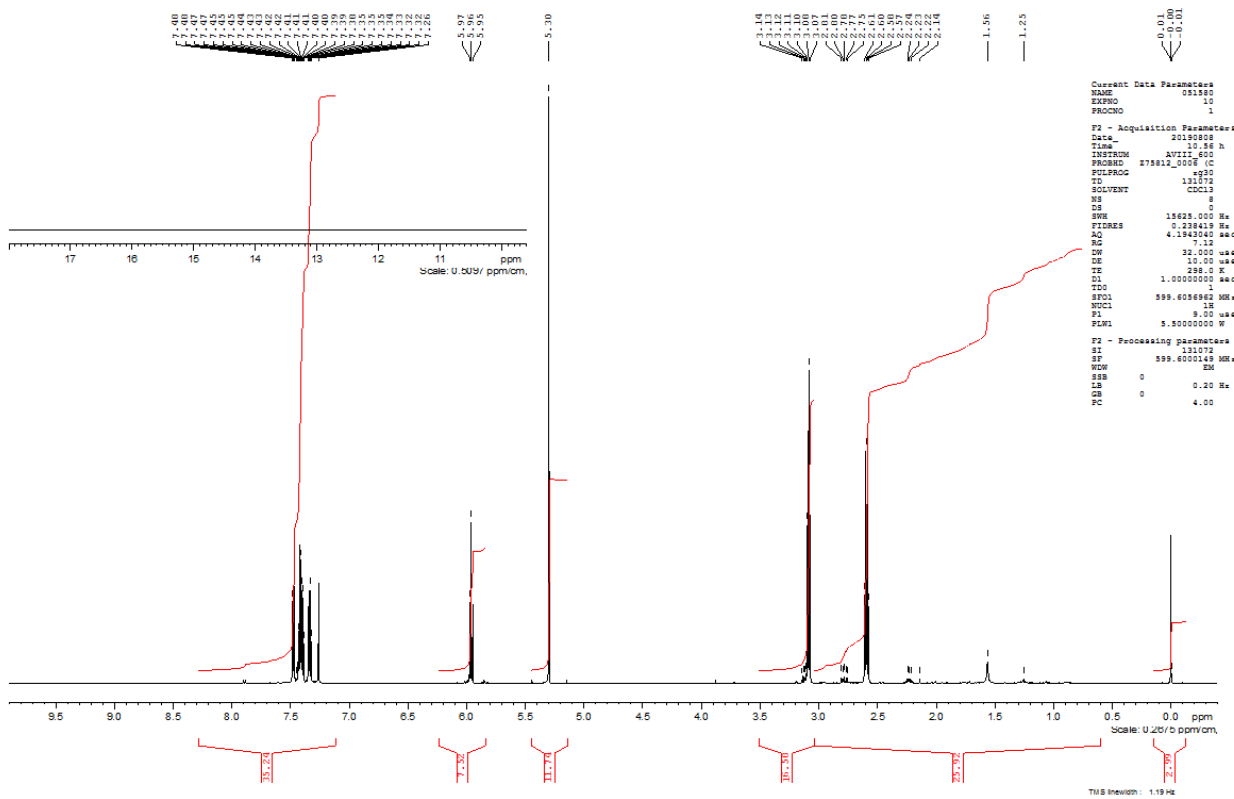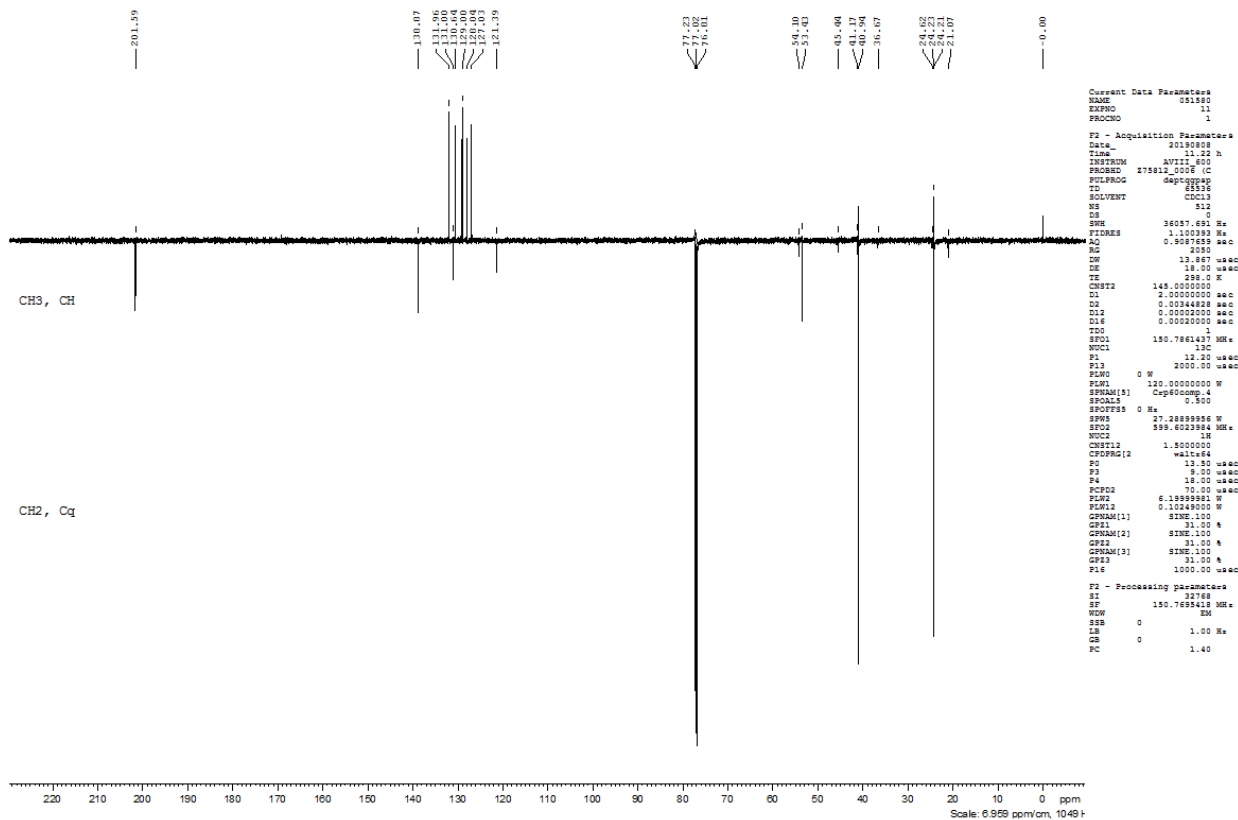



5,5-Dichloro-1-(4-bromophenyl)pent-4-en-1-one (6g)

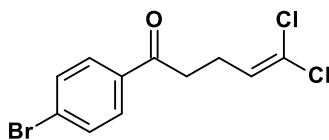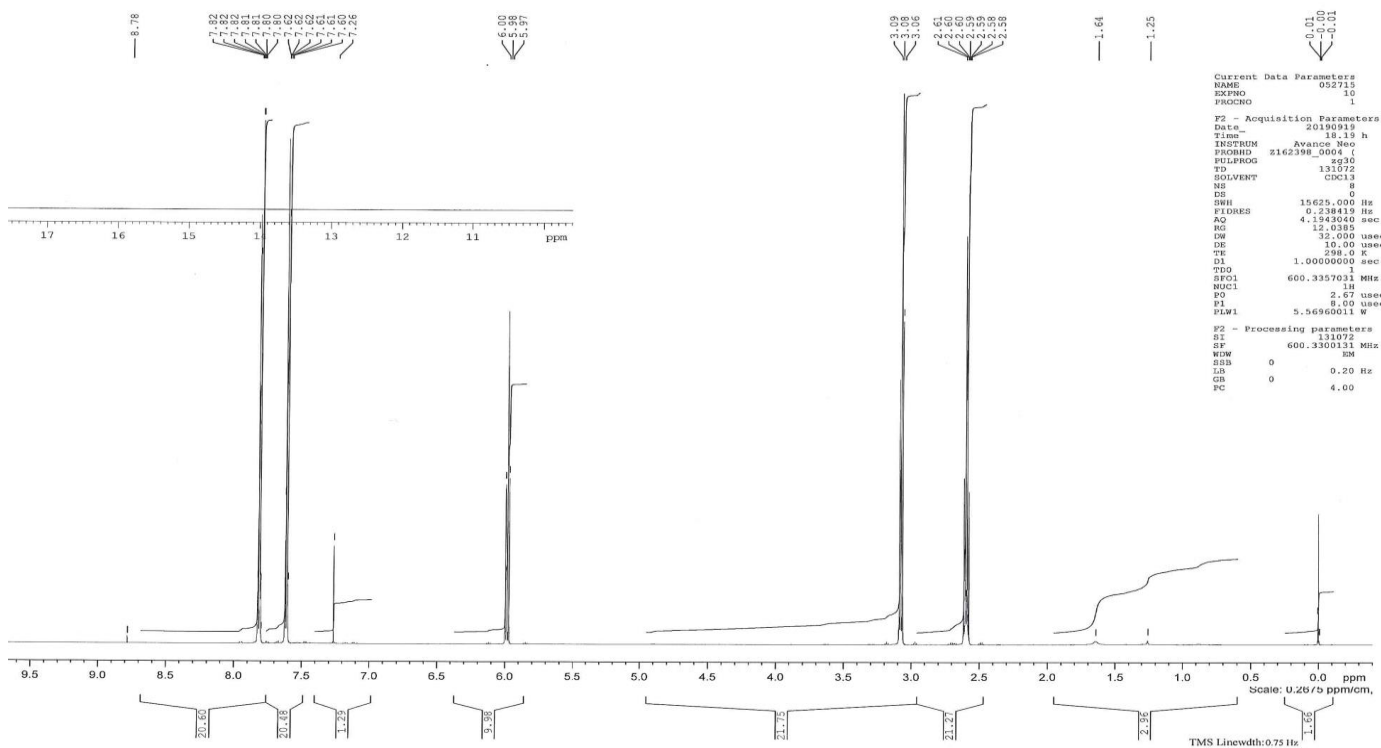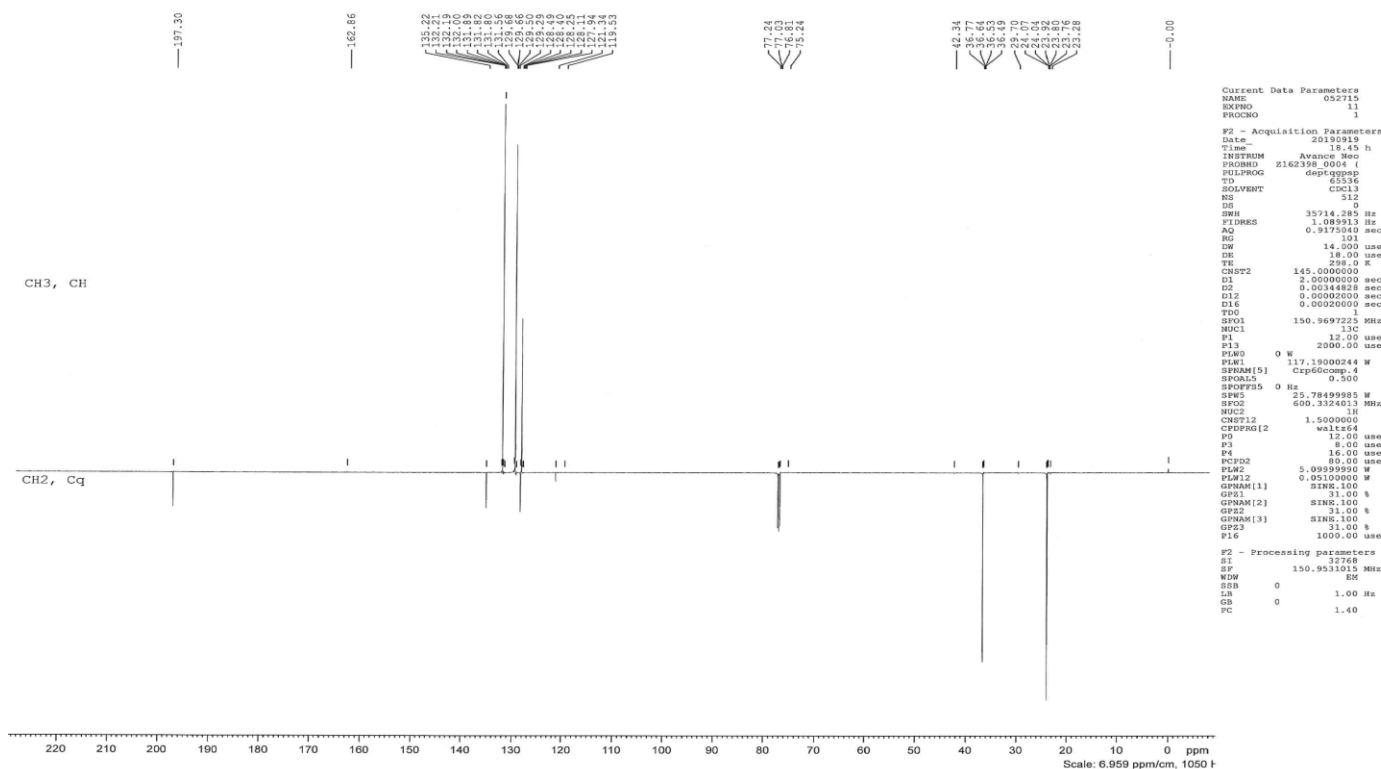

5,5-Dichloro-1-(2-naphthyl)pent-4-en-1-one (6h)

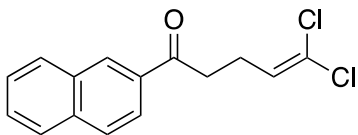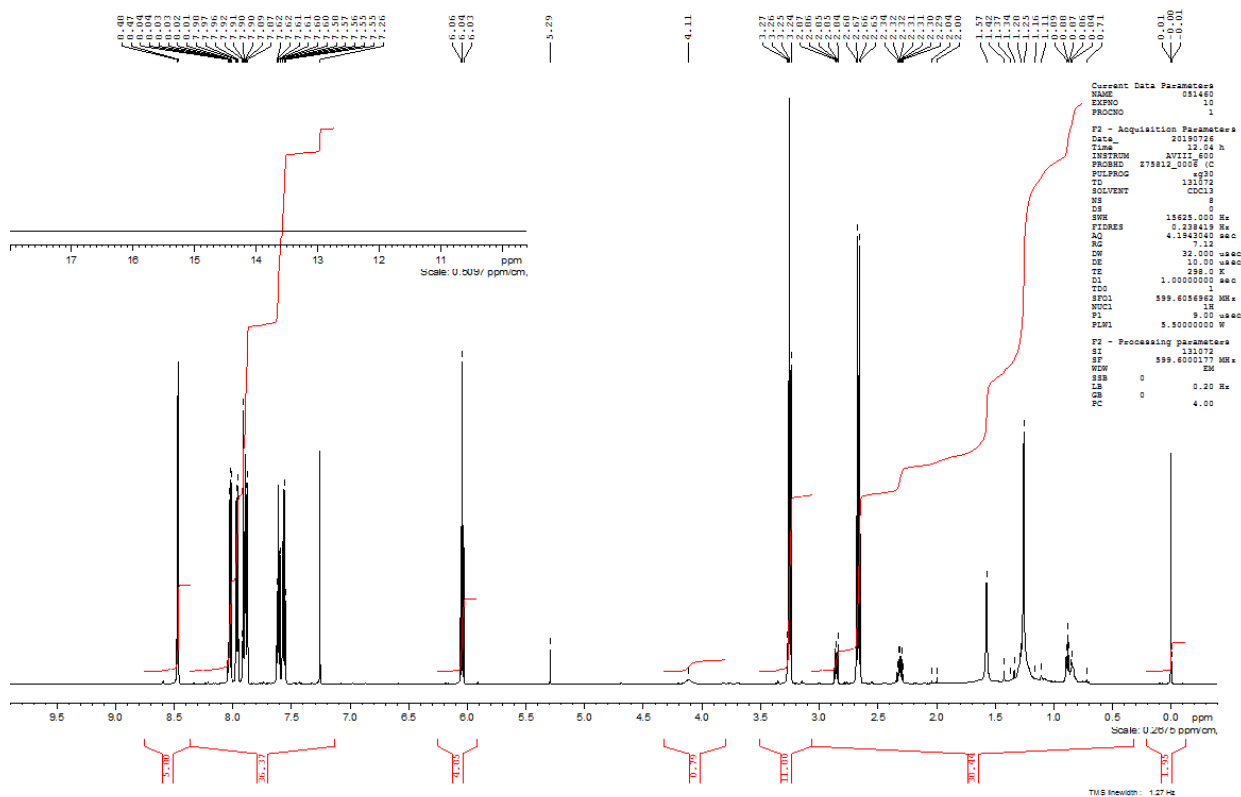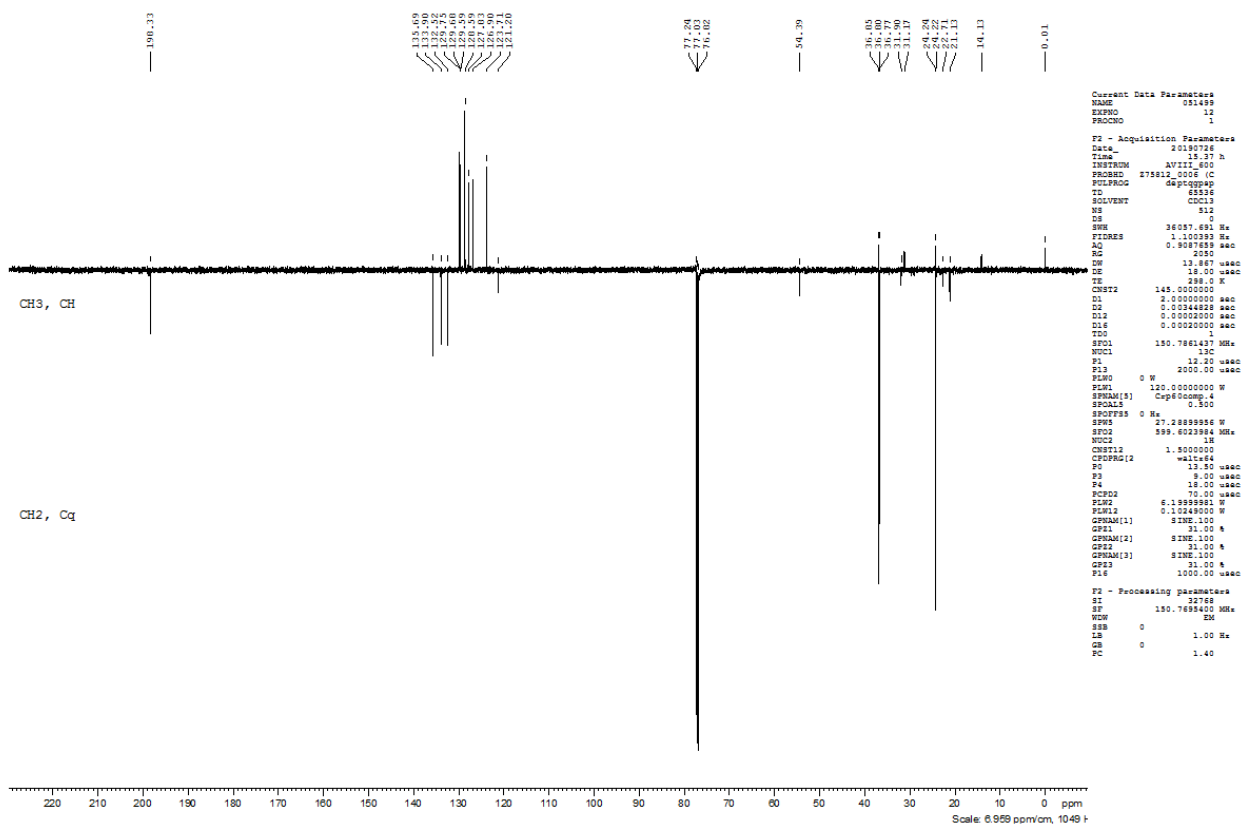

5,5-Dichloro-1-(2-pyridyl)pent-4-en-1-one (6i)

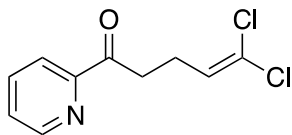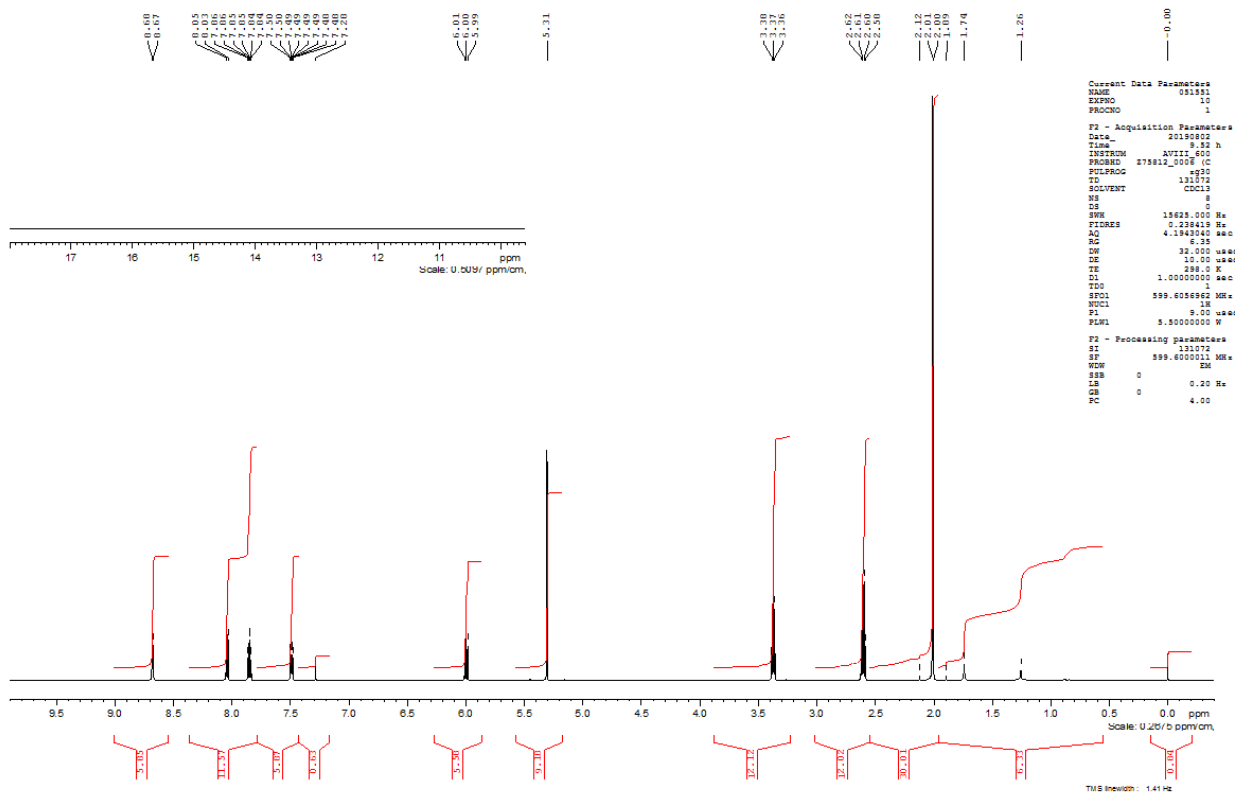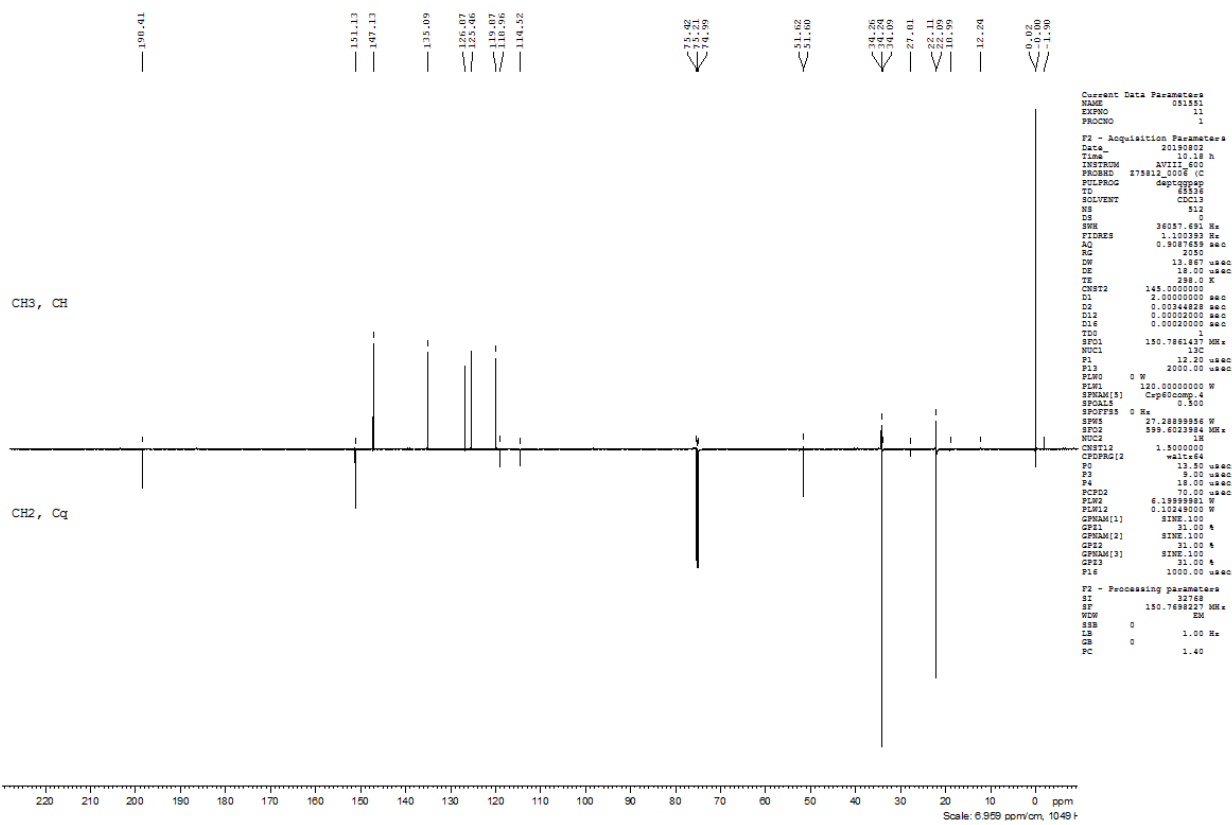



# 4,4-Dichloro-1-phenyl-but-3-en-1-one (6l)

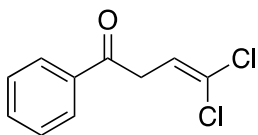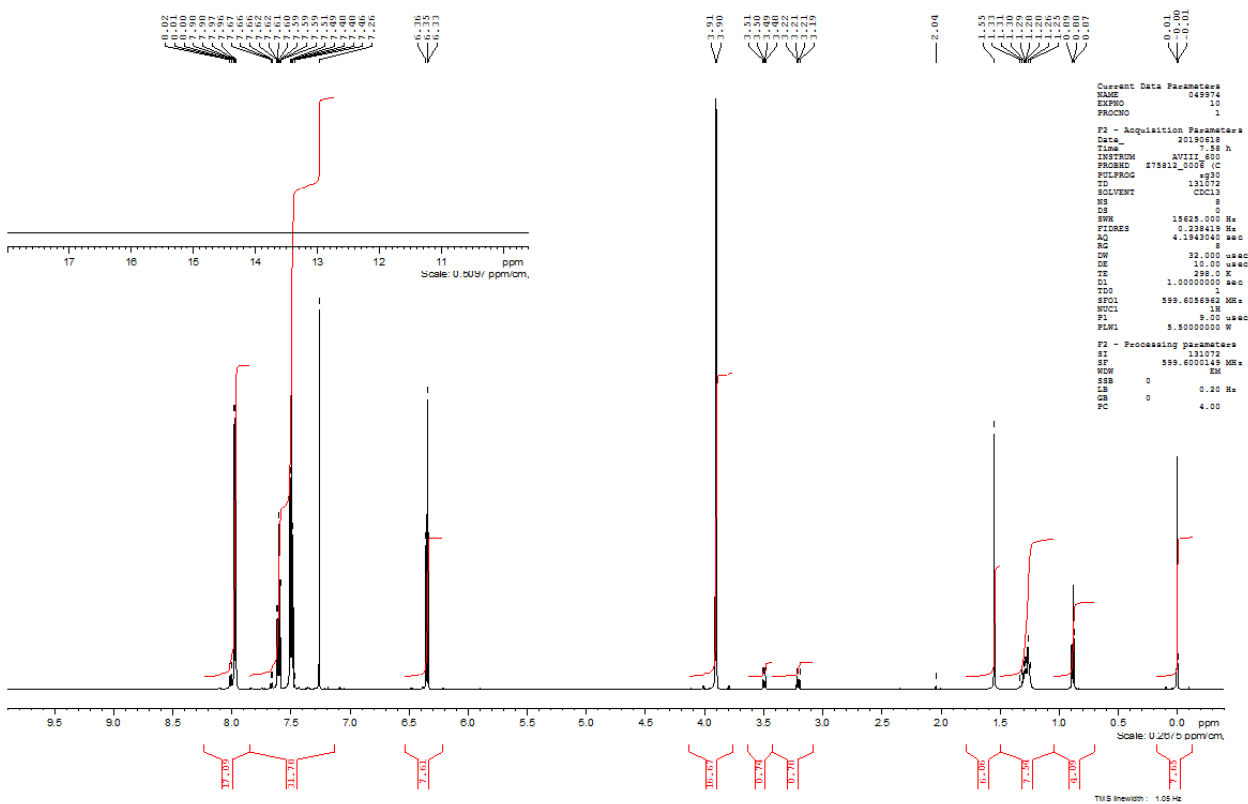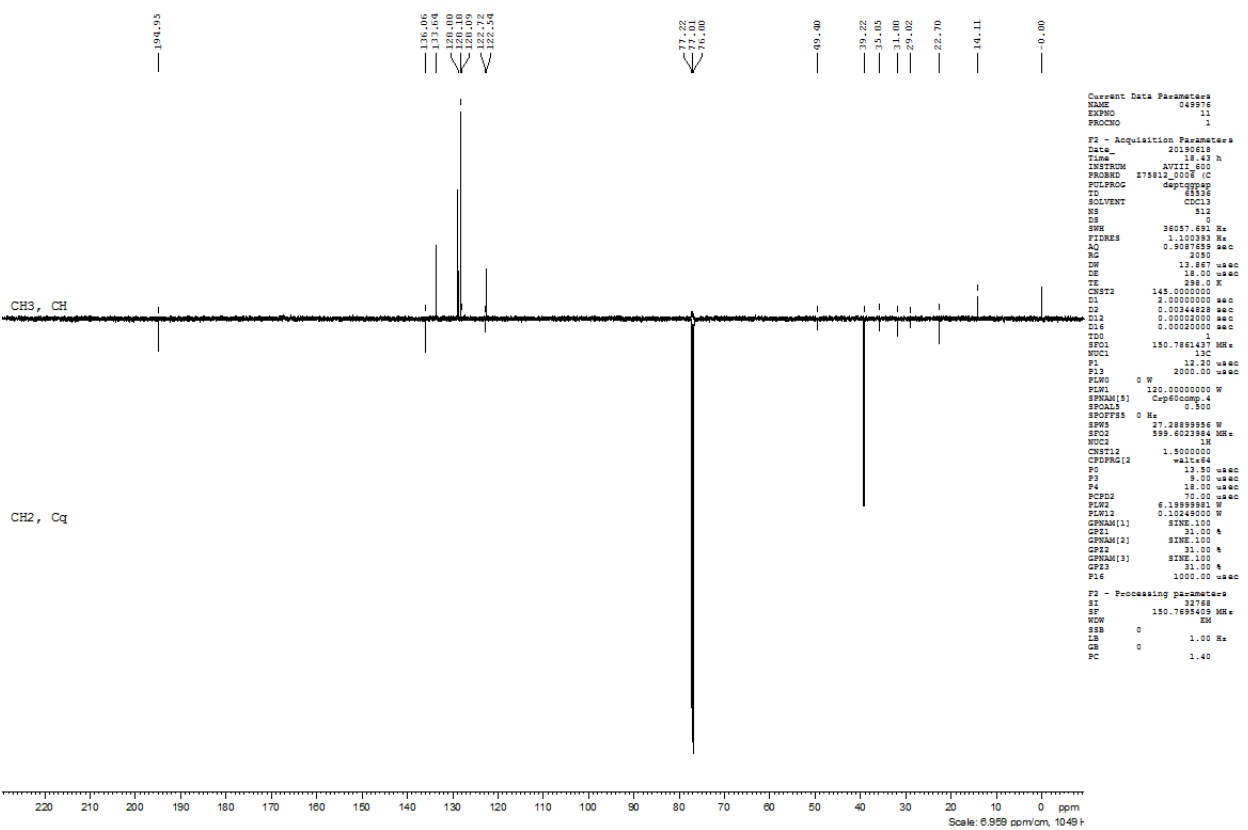

### 3,3-Dichloro-1-phenyl-prop-2-ene-1-one (6m)

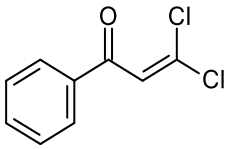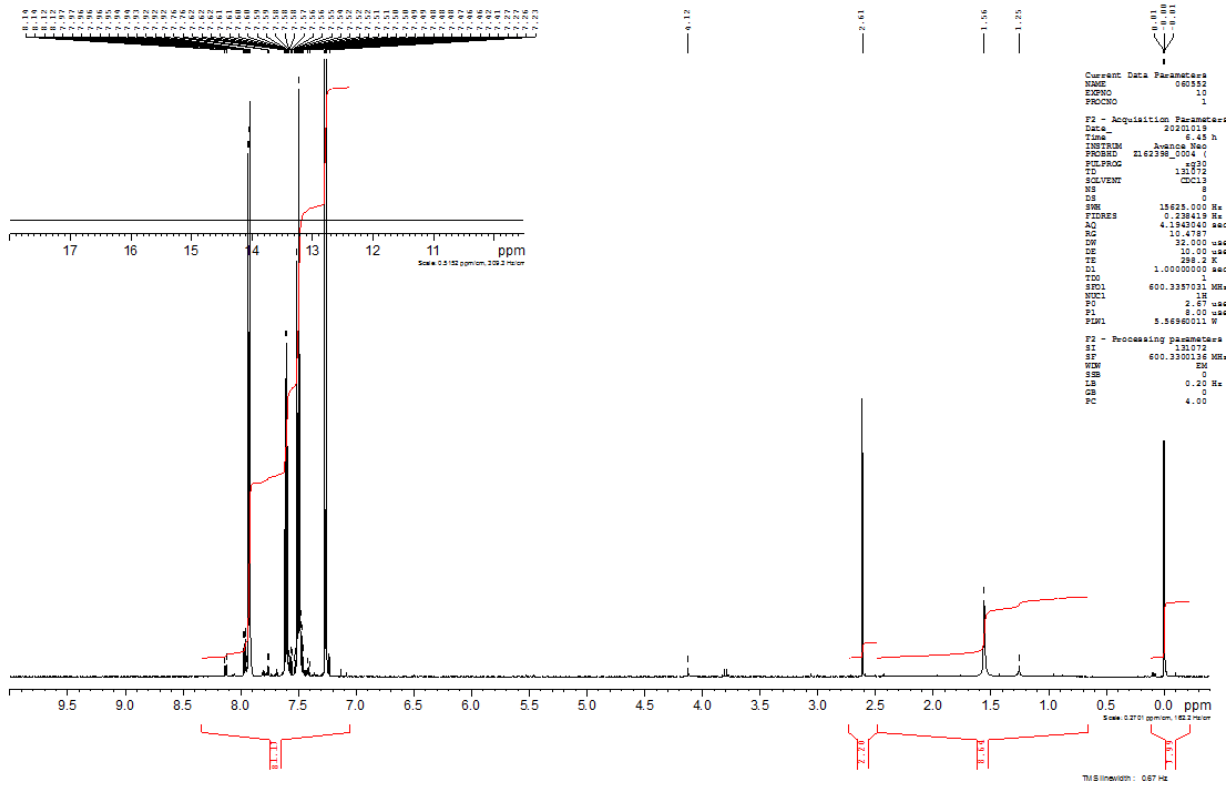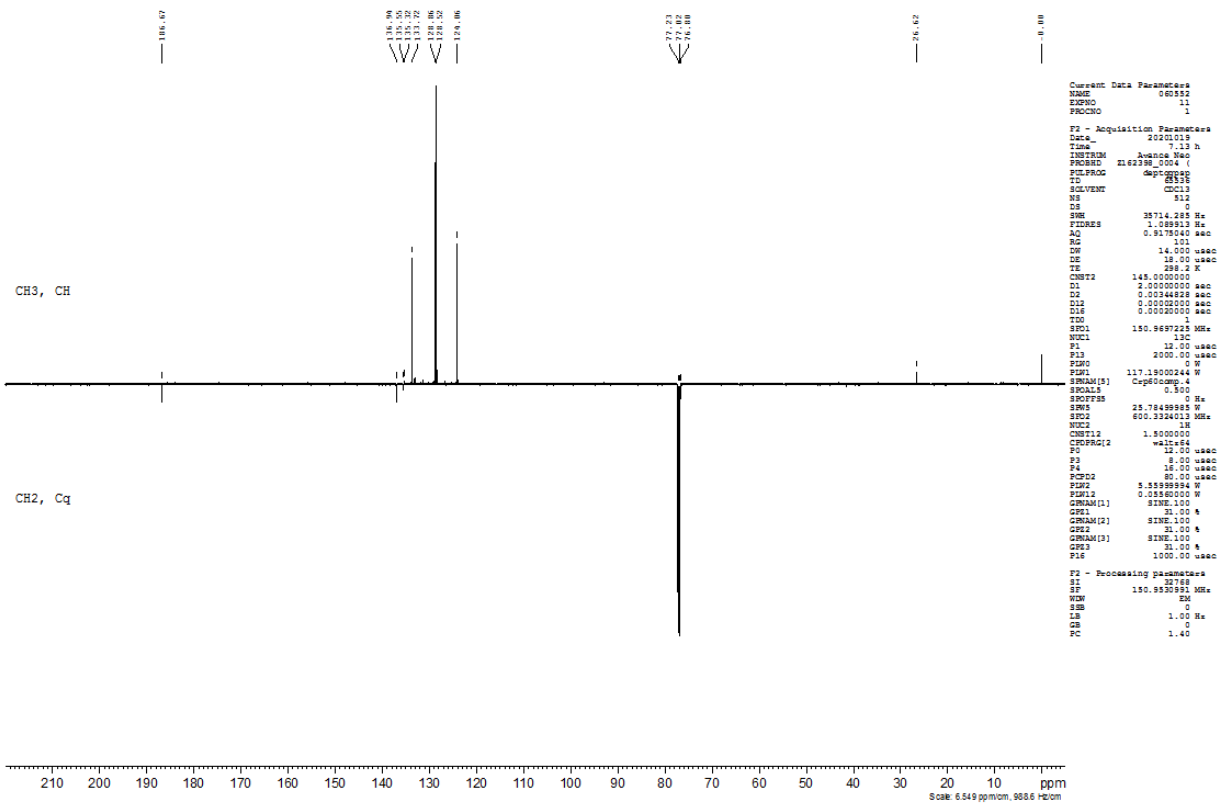

5-Chloro-4-methoxy-7,8-dihydrobenzo[7]annulen-9-one (9)

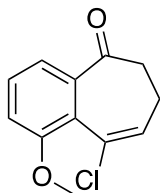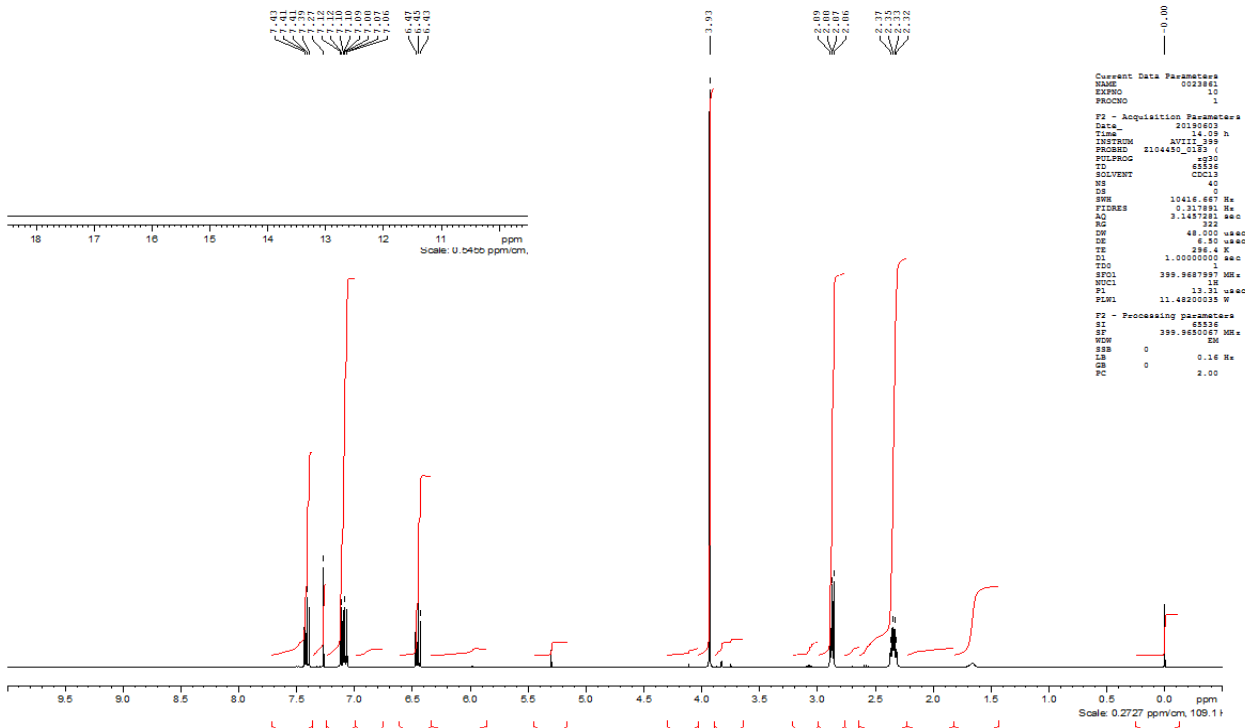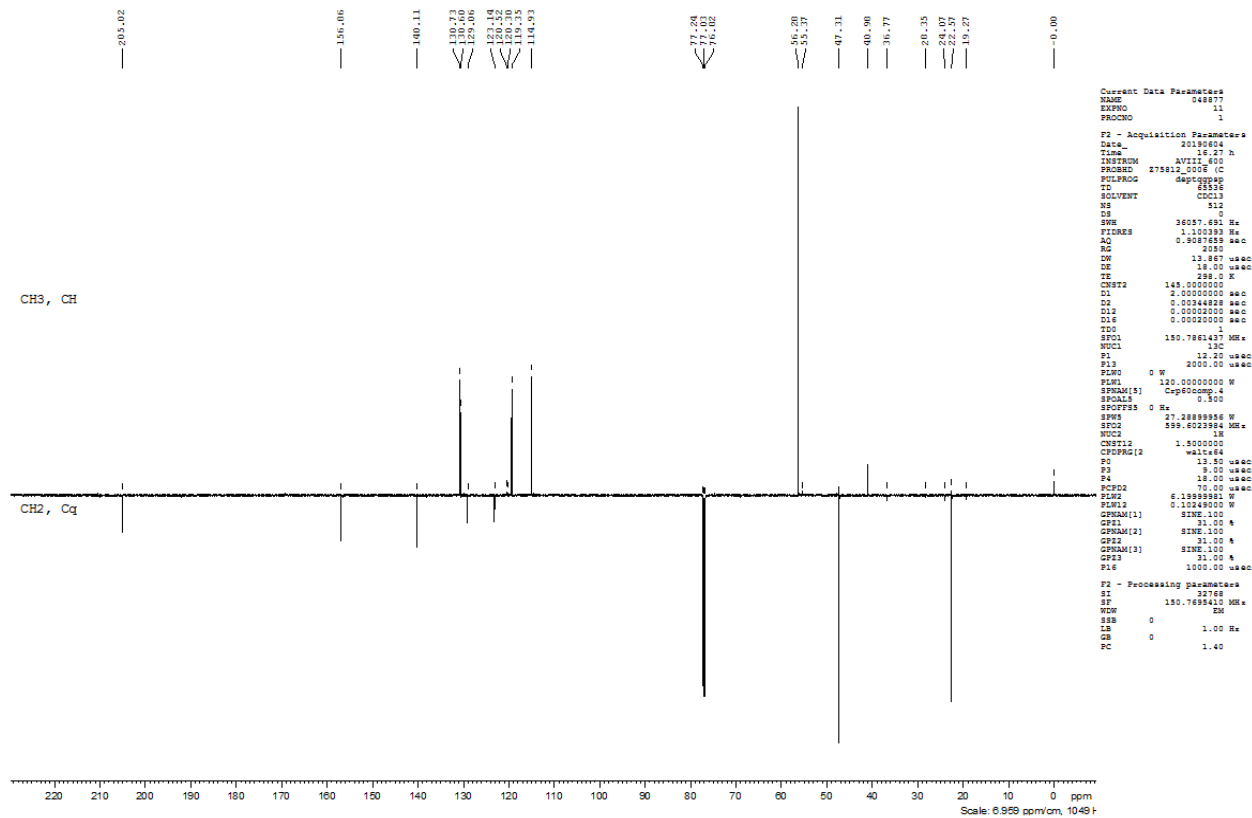

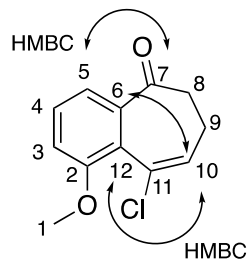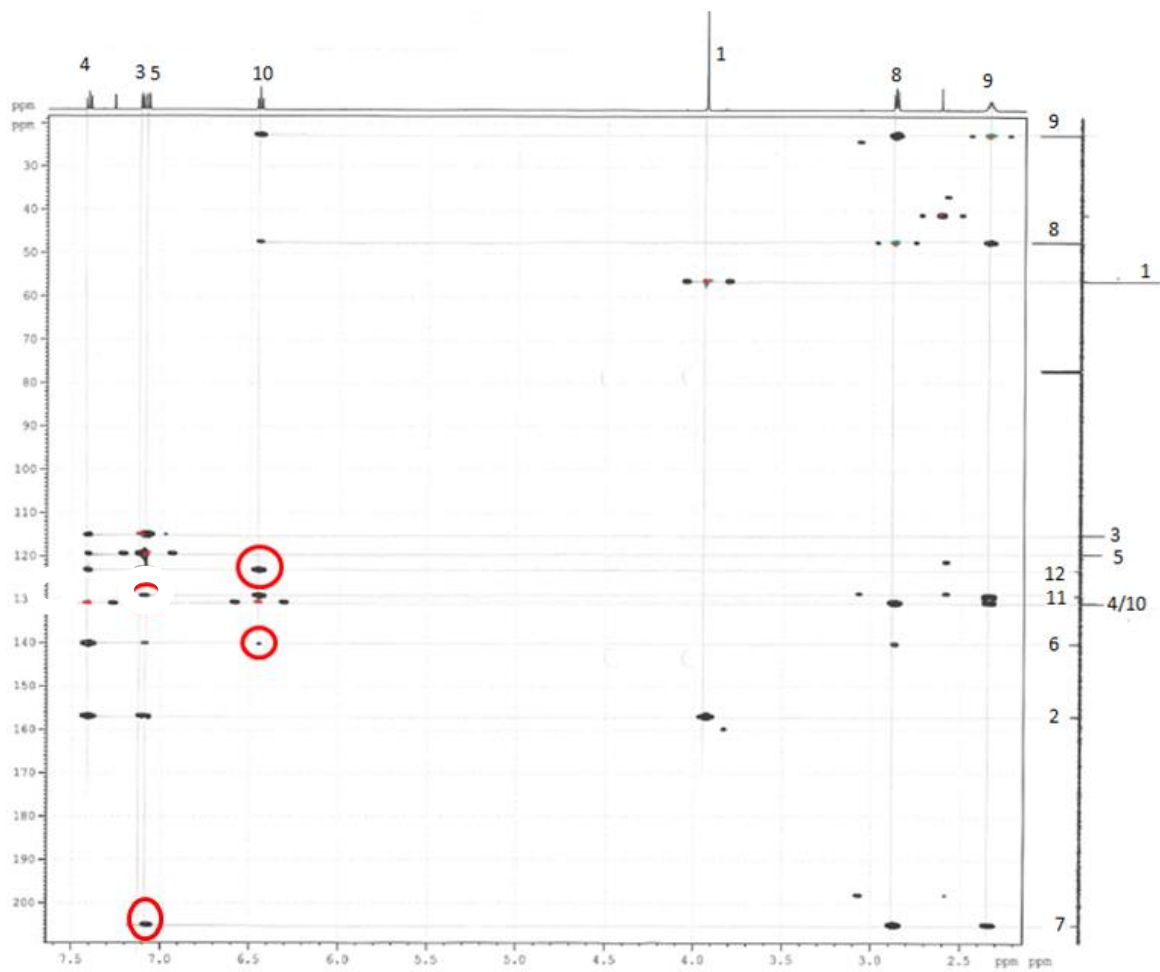

$^1\text{H}$ - $^{13}\text{C}$ -HSQCs (red and green) and  $^1\text{H}$ - $^{13}\text{C}$ -HMBCs (black) of 5-chloro-4-methoxy-7,8-dihydrobenzo[7]annulen-9-one (**9**).

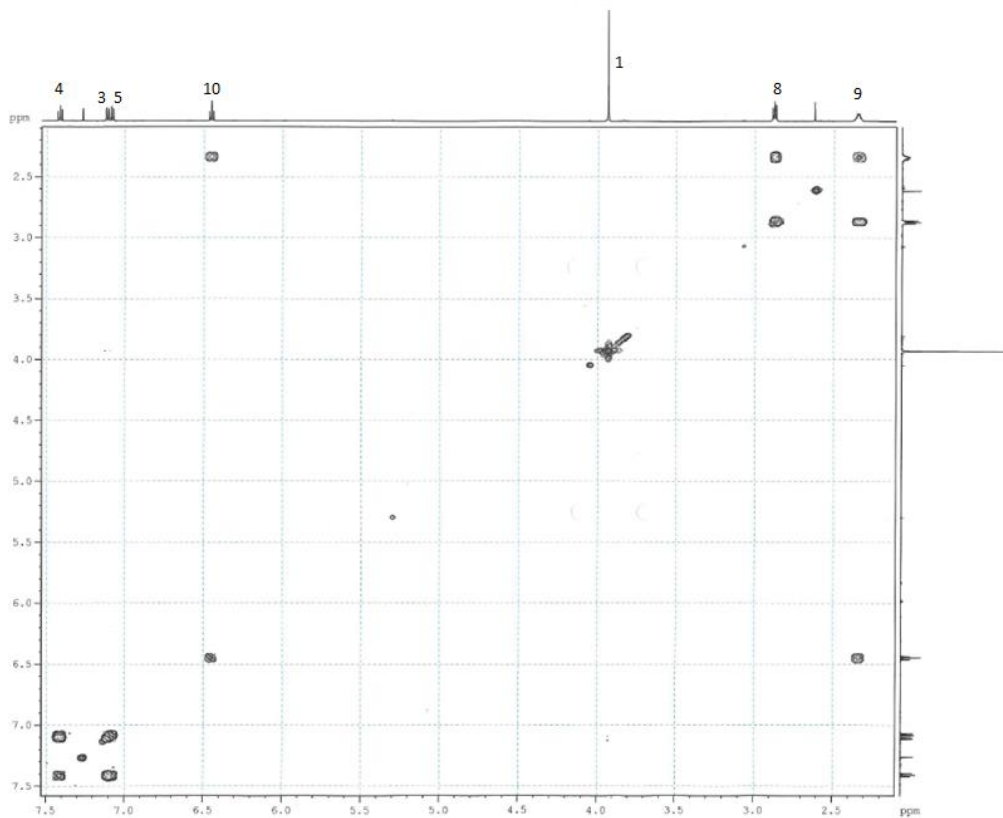

COSY of 5-chloro-4-methoxy-7,8-dihydrobenzo[7]annulen-9-one (**9**).

# 5-Chloro-2-methoxy-7,8-dihydrobenzo[7]annulen-9-one (10)

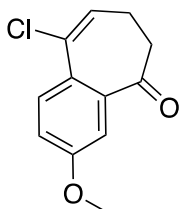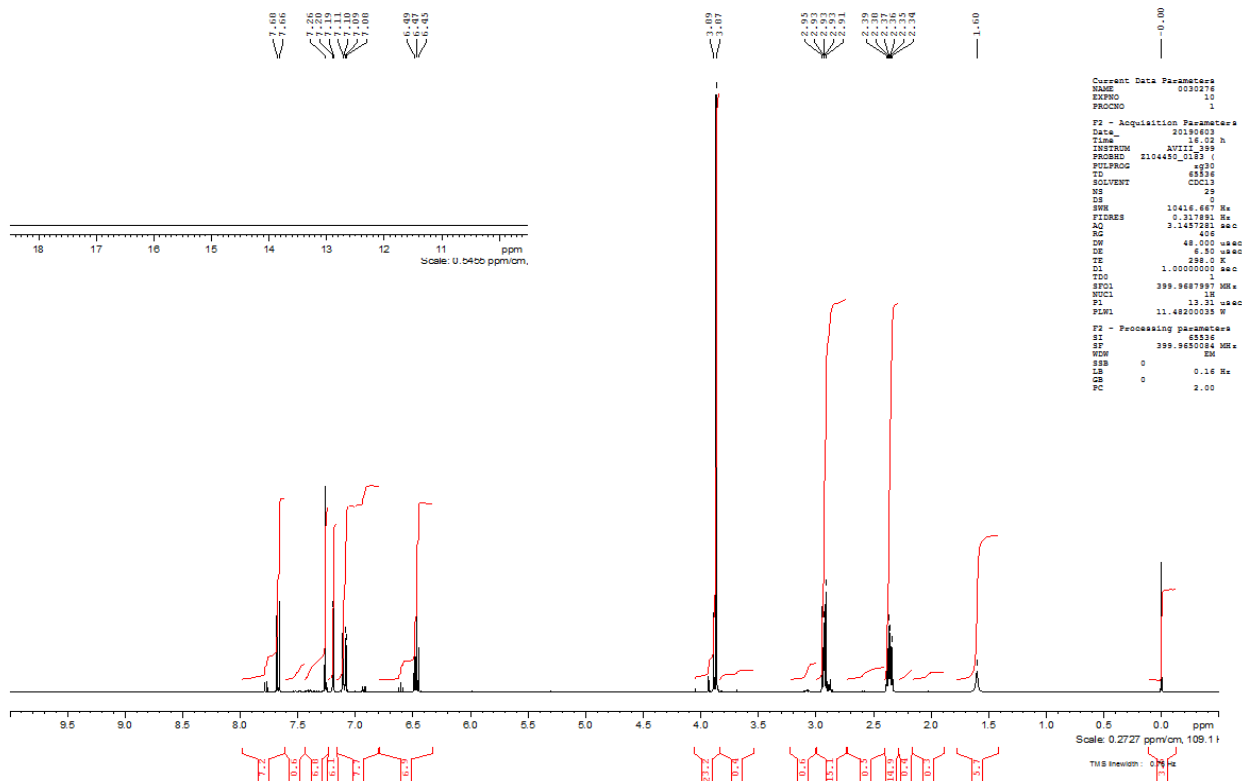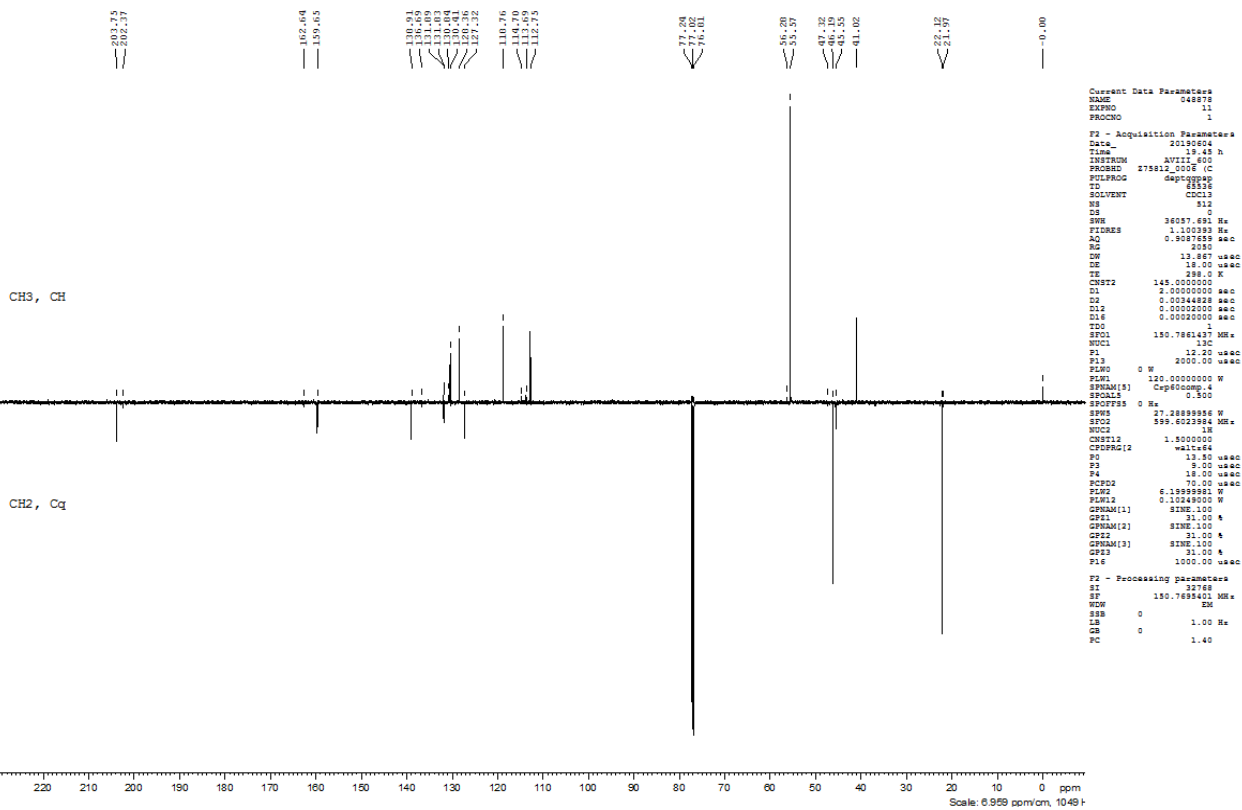

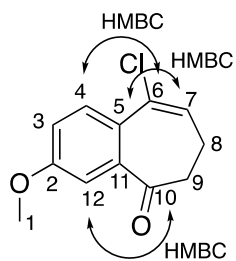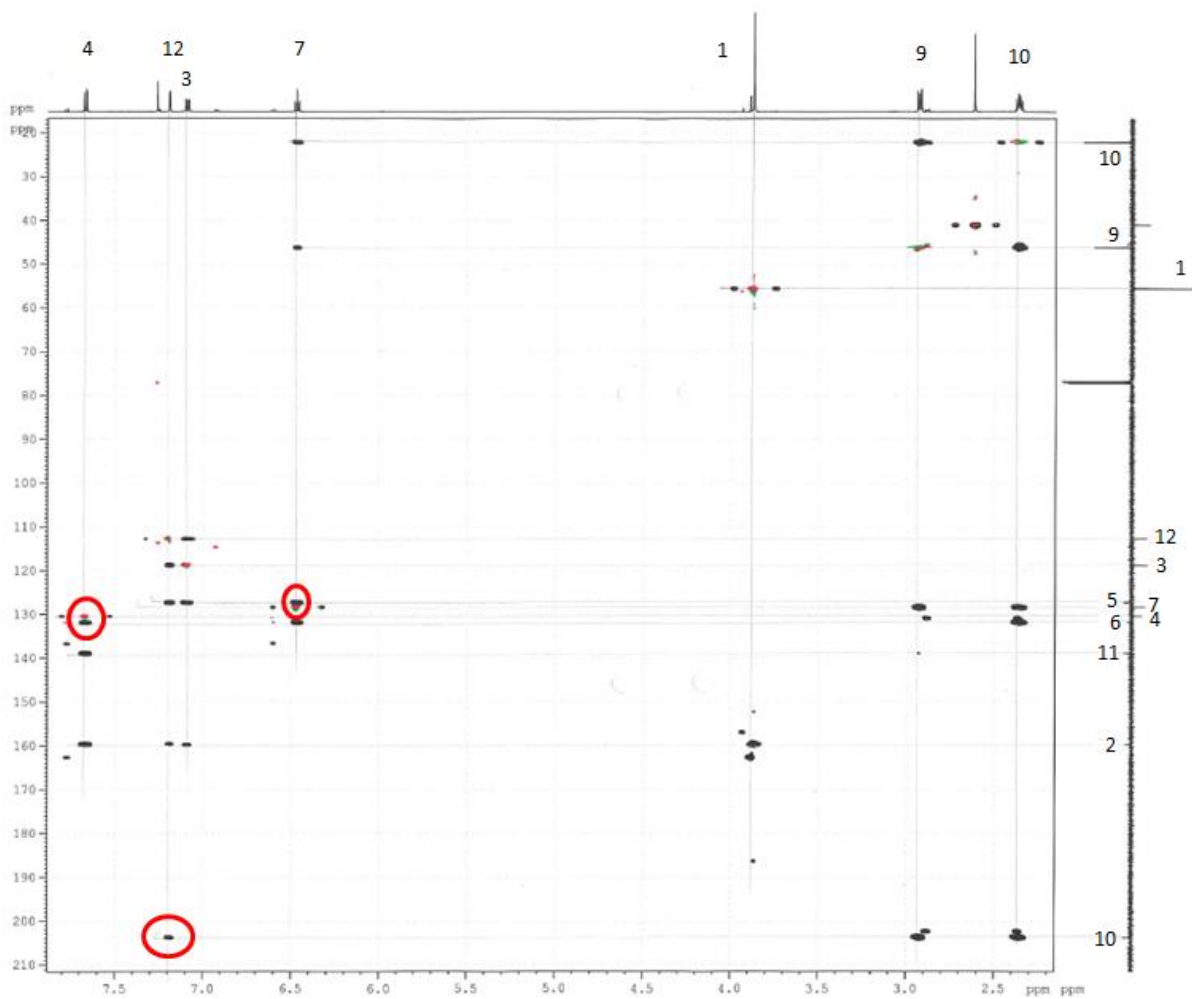

$^1\text{H}$ - $^{13}\text{C}$ -HSQCs (red and green) and  $^1\text{H}$ - $^{13}\text{C}$ -HMBCs (black) of 5-chloro-2-methoxy-7,8-dihydrobenzo[7]annulen-9-one (**10**).

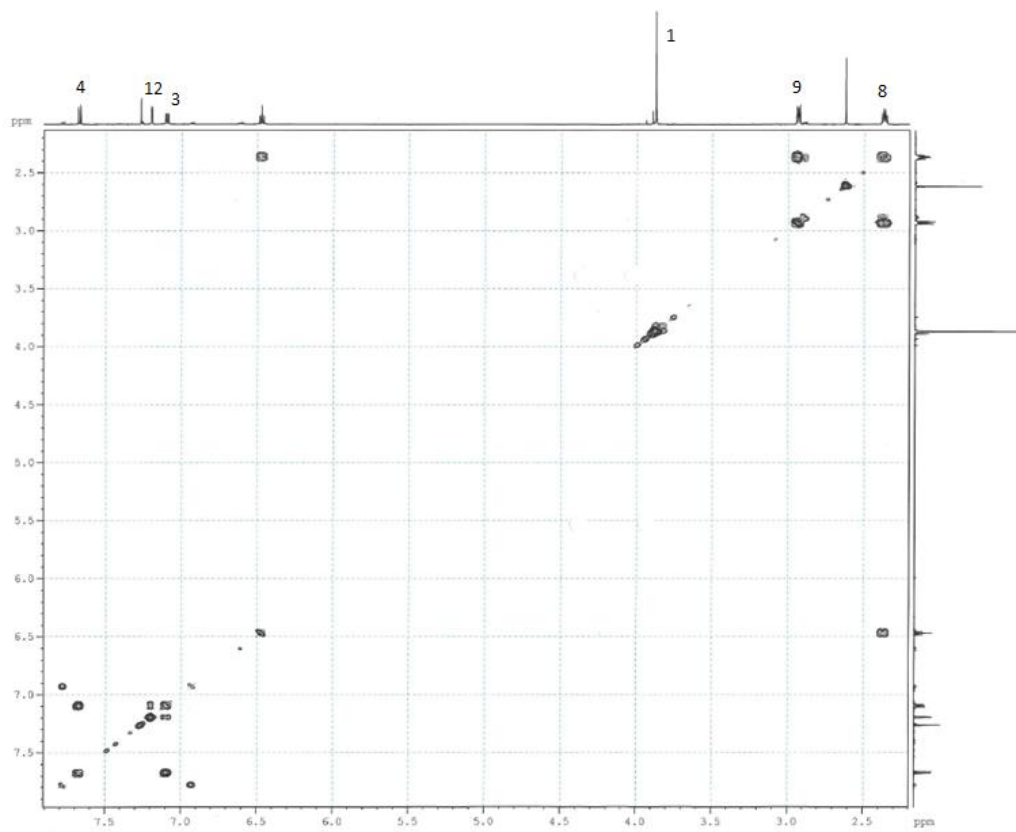

COSY of 5-chloro-2-methoxy-7,8-dihydrobenzo[7]annulen-9-one (**10**).



**(Z)-5-Chloro-5-(4-methoxyphenyl)pent-4-enoyl chloride (13)**

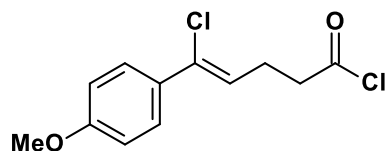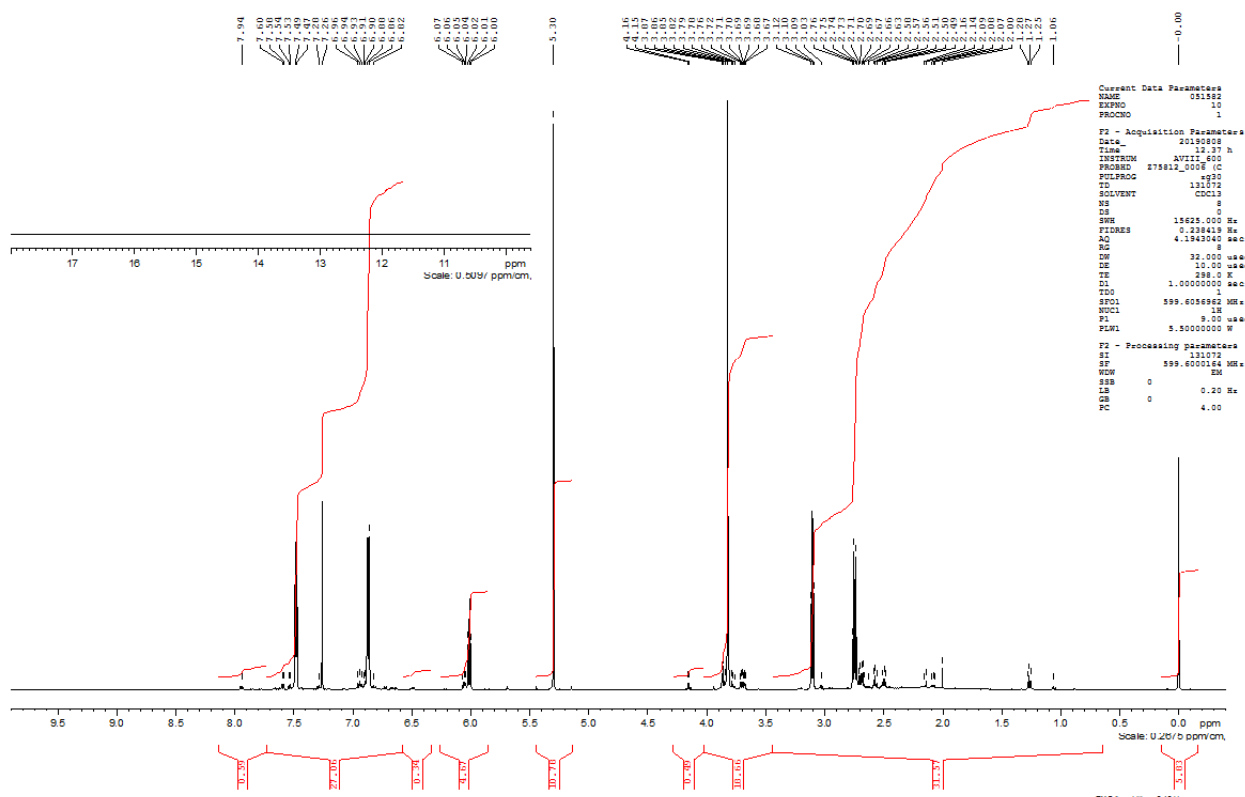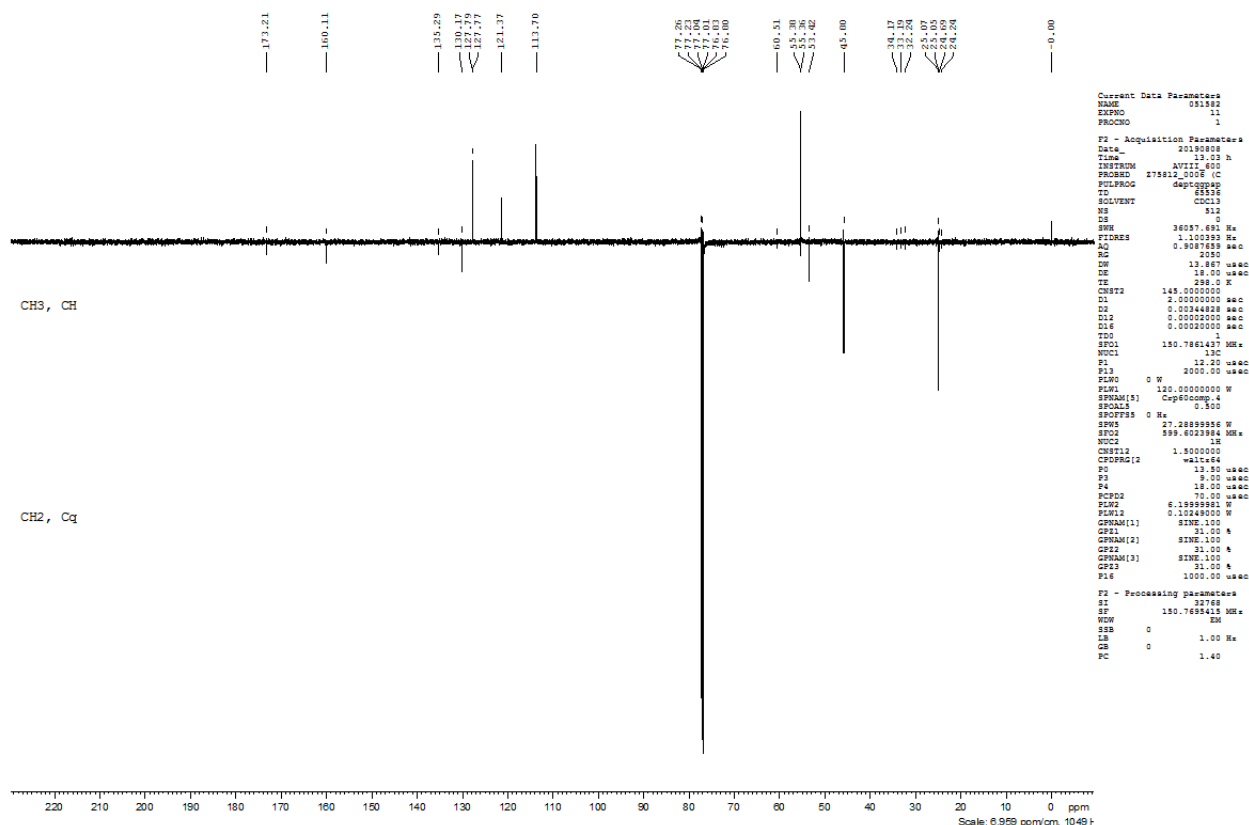

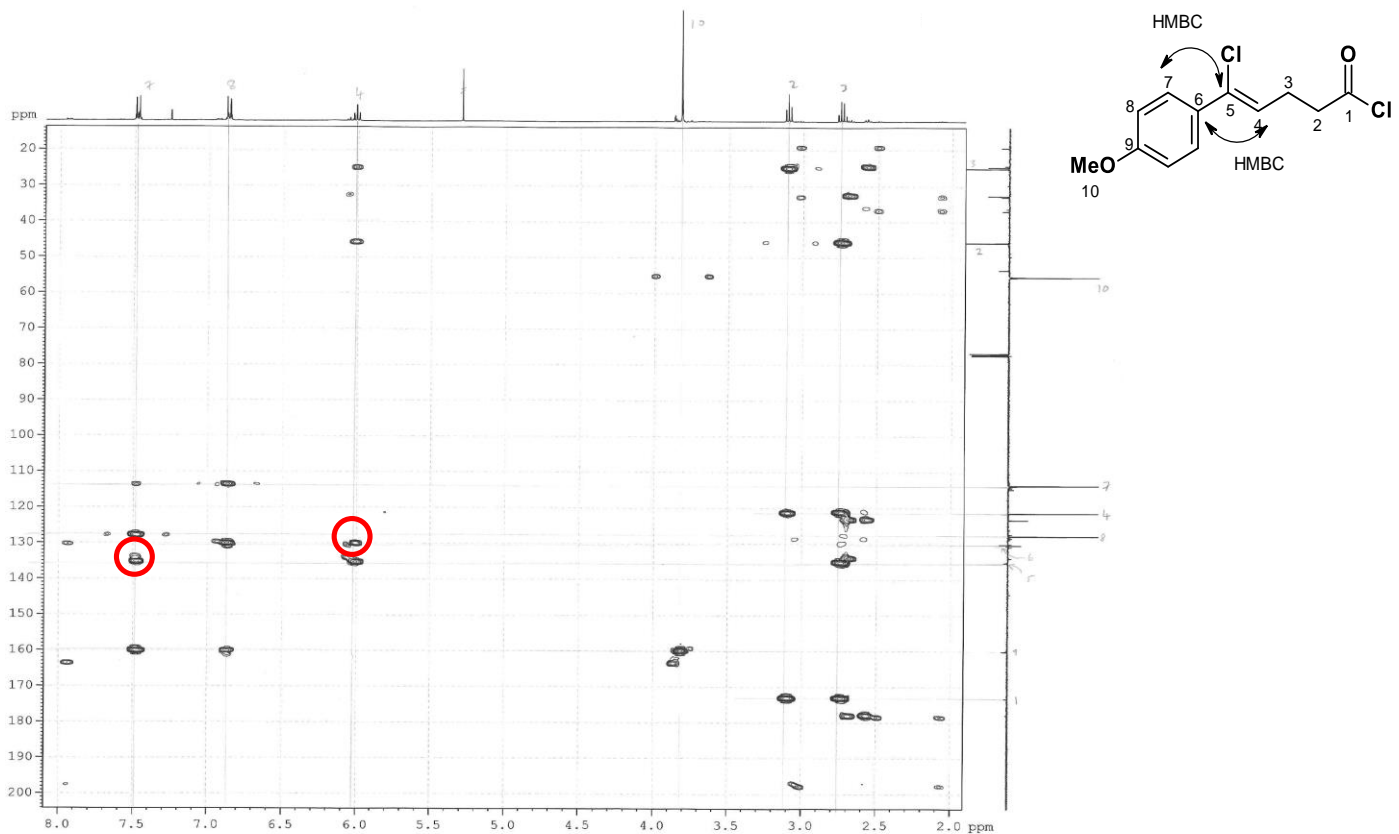

HMBC of 13

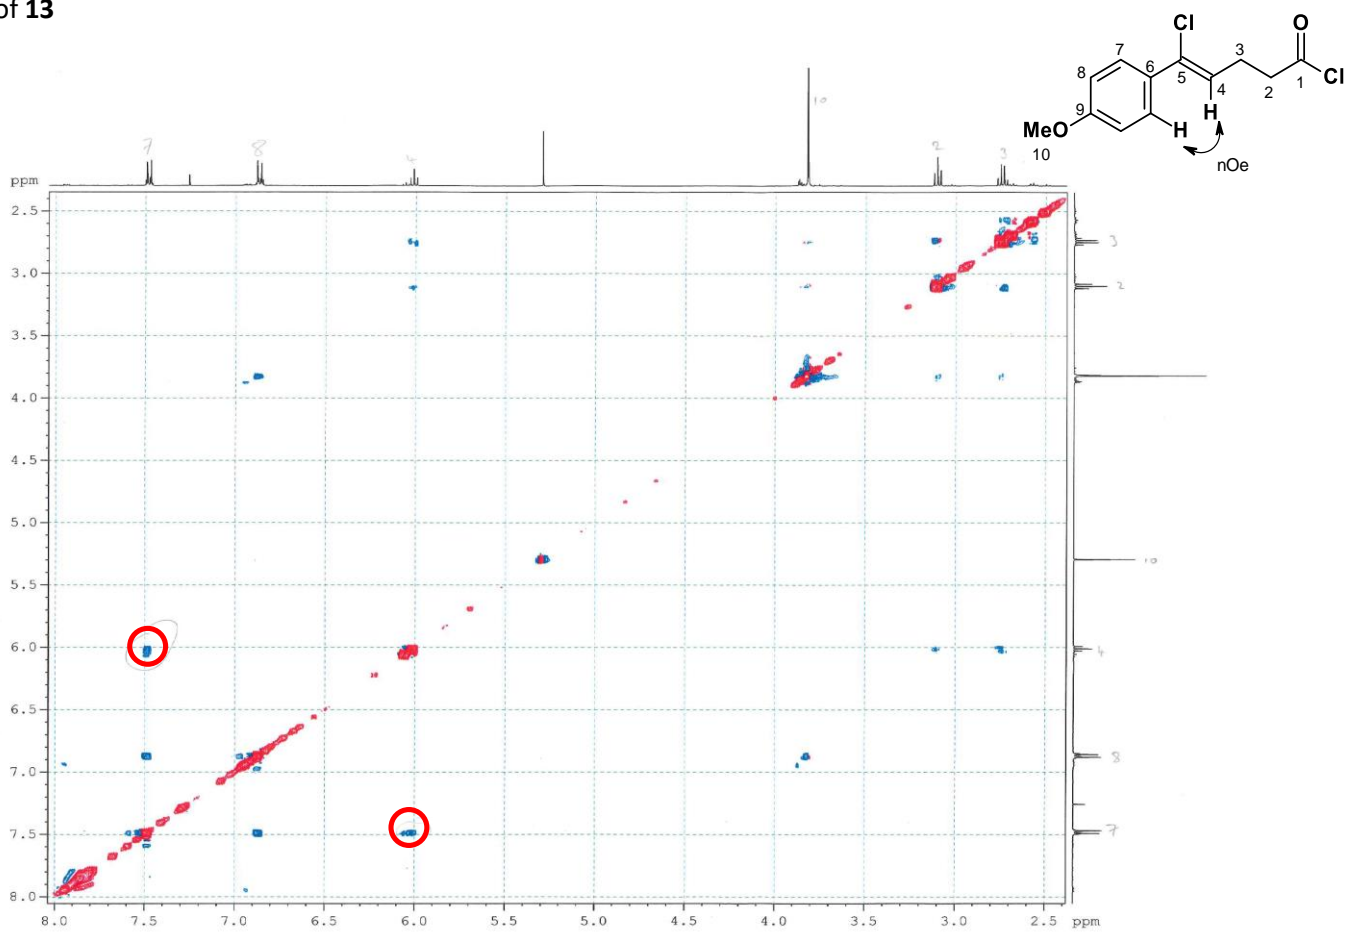

NOESY of 13

**(Z)-5-Chloro-5-(4-methoxyphenyl)pent-4-enoic acid (14)**

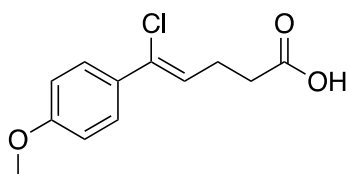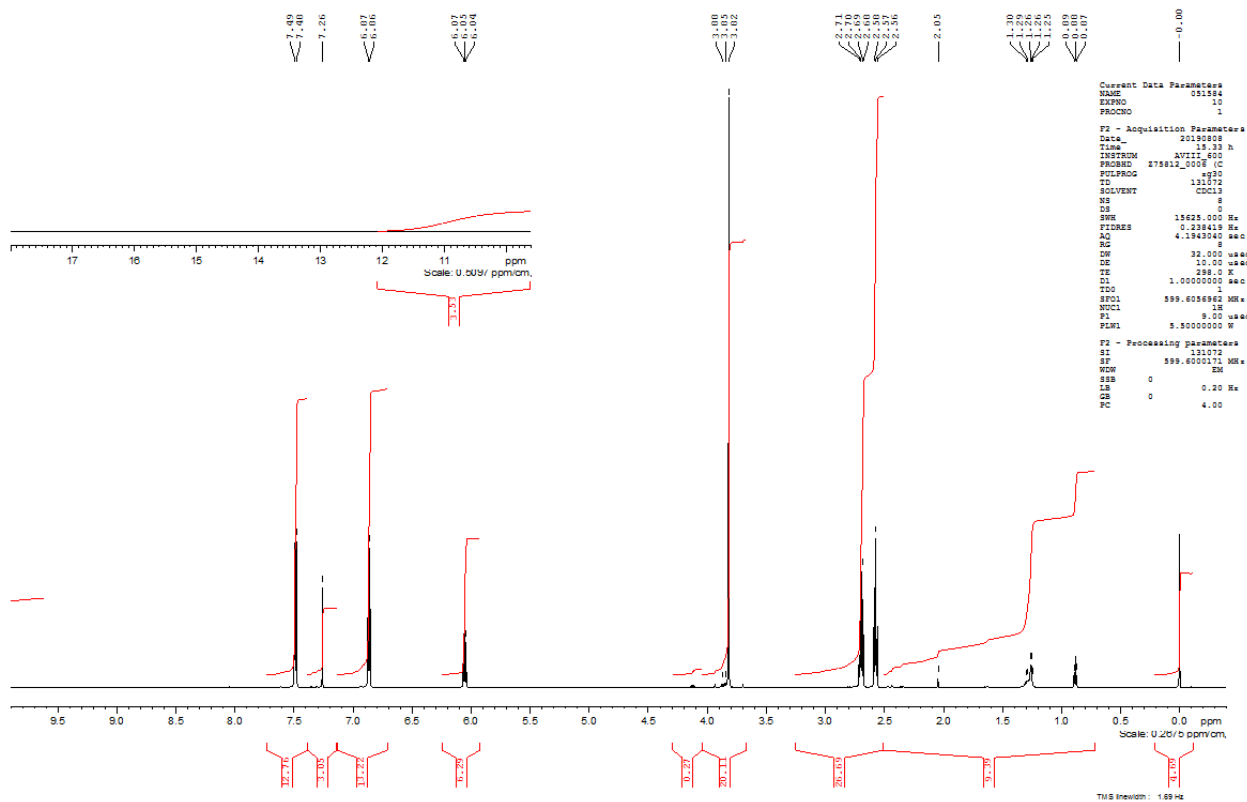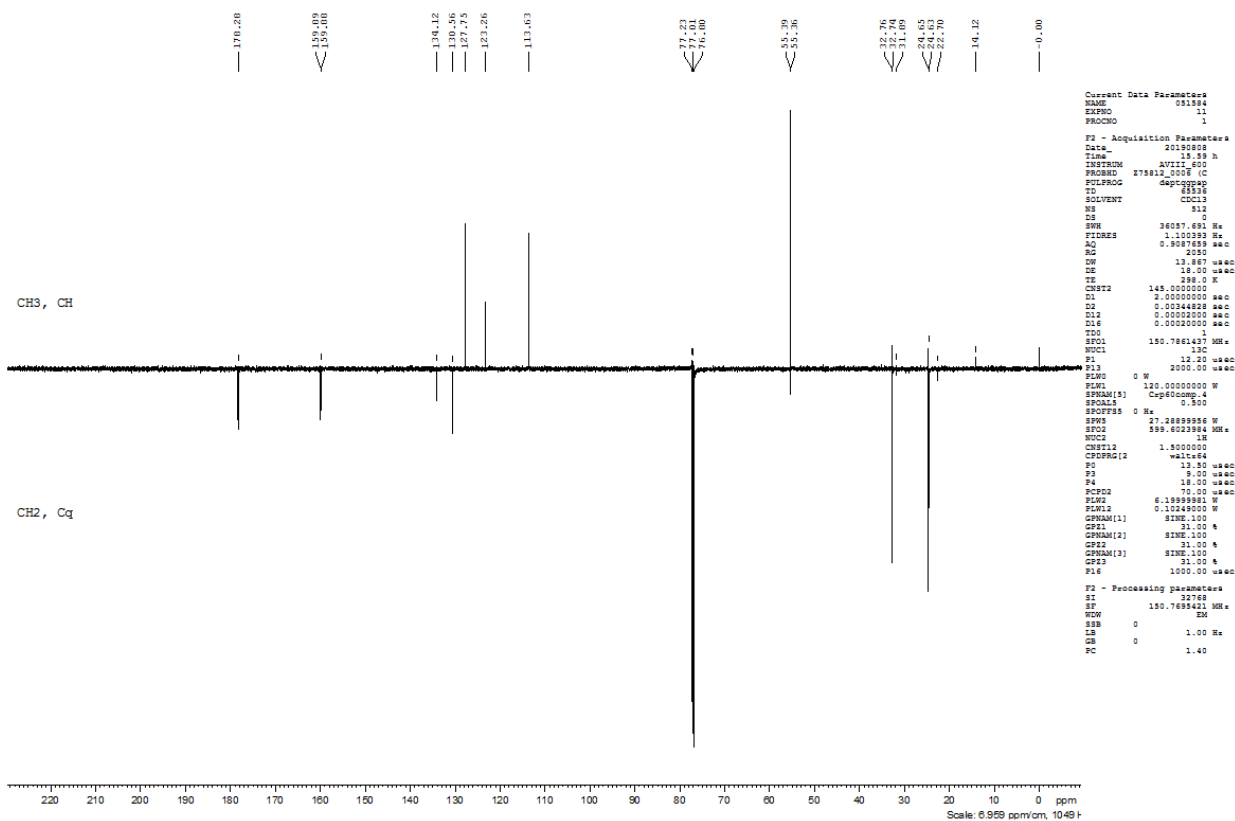

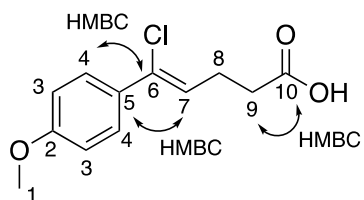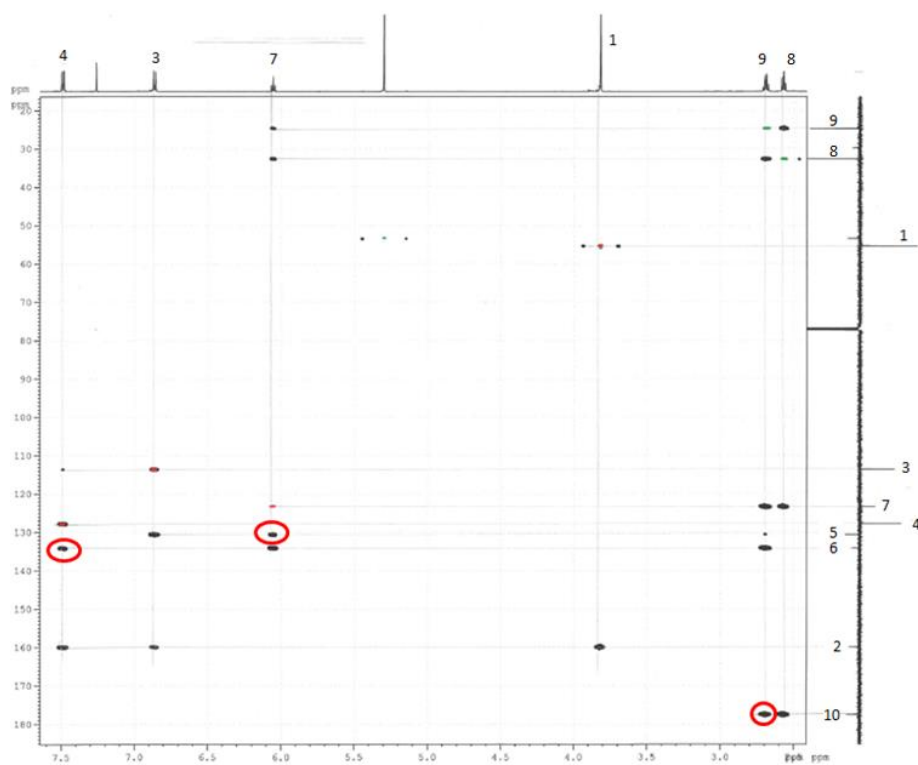

$^1\text{H}$ - $^{13}\text{C}$ -HSQCs (red and green) of  $^1\text{H}$ - $^{13}\text{C}$ -HMBCs (black) of (*Z*)-5-chloro-5-(4-methoxyphenyl)pent-4-enoic acid (**14**).

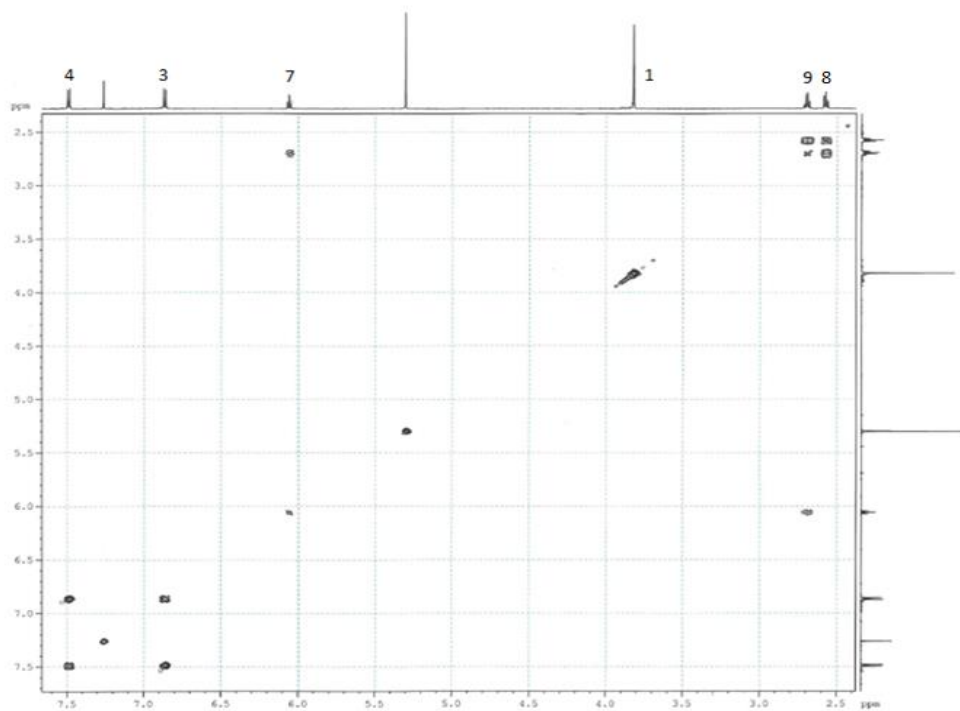

COSY of (*Z*)-5-chloro-5-(4-methoxyphenyl)pent-4-enoic acid (**14**).

# 5-(4-Methoxyphenyl)-5-oxo-pentanoic acid (15)

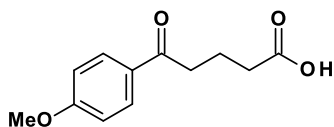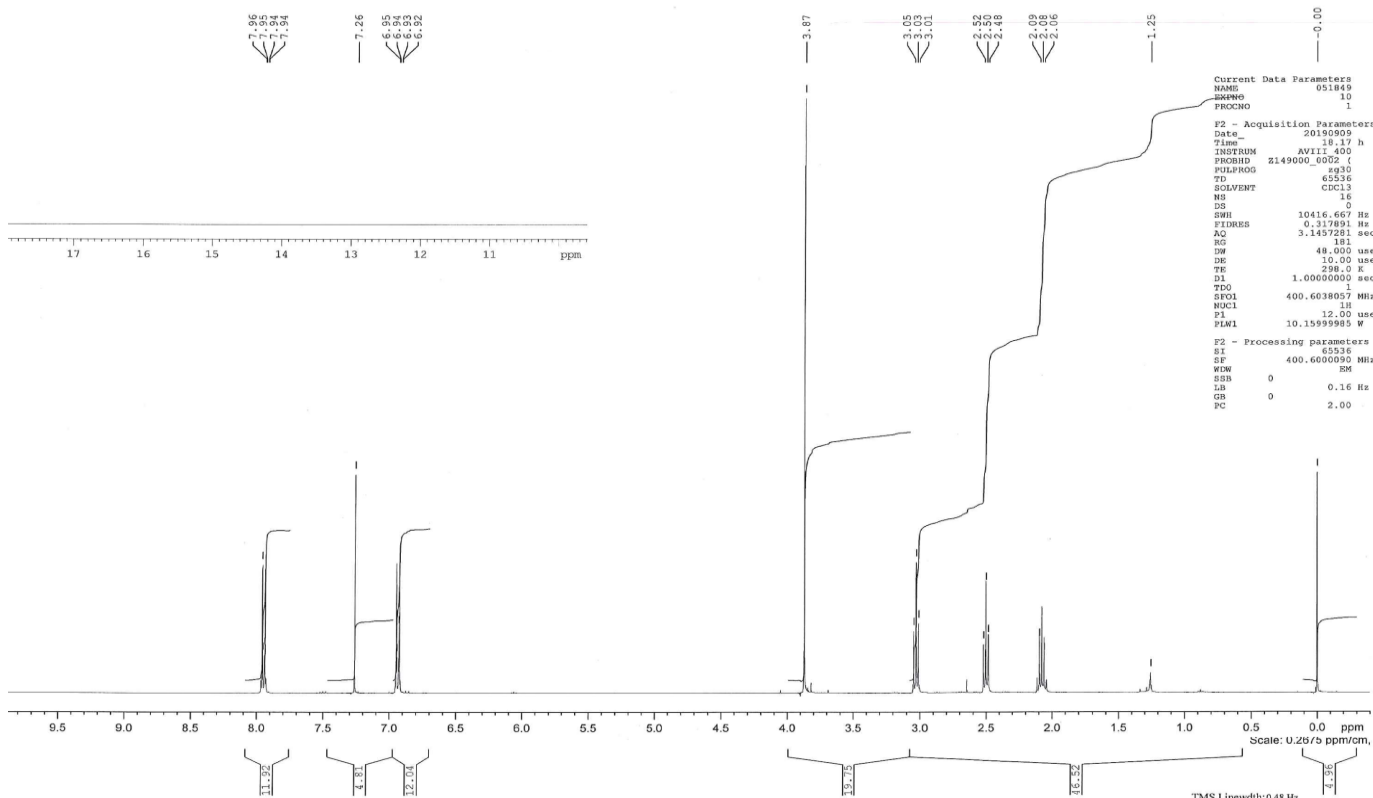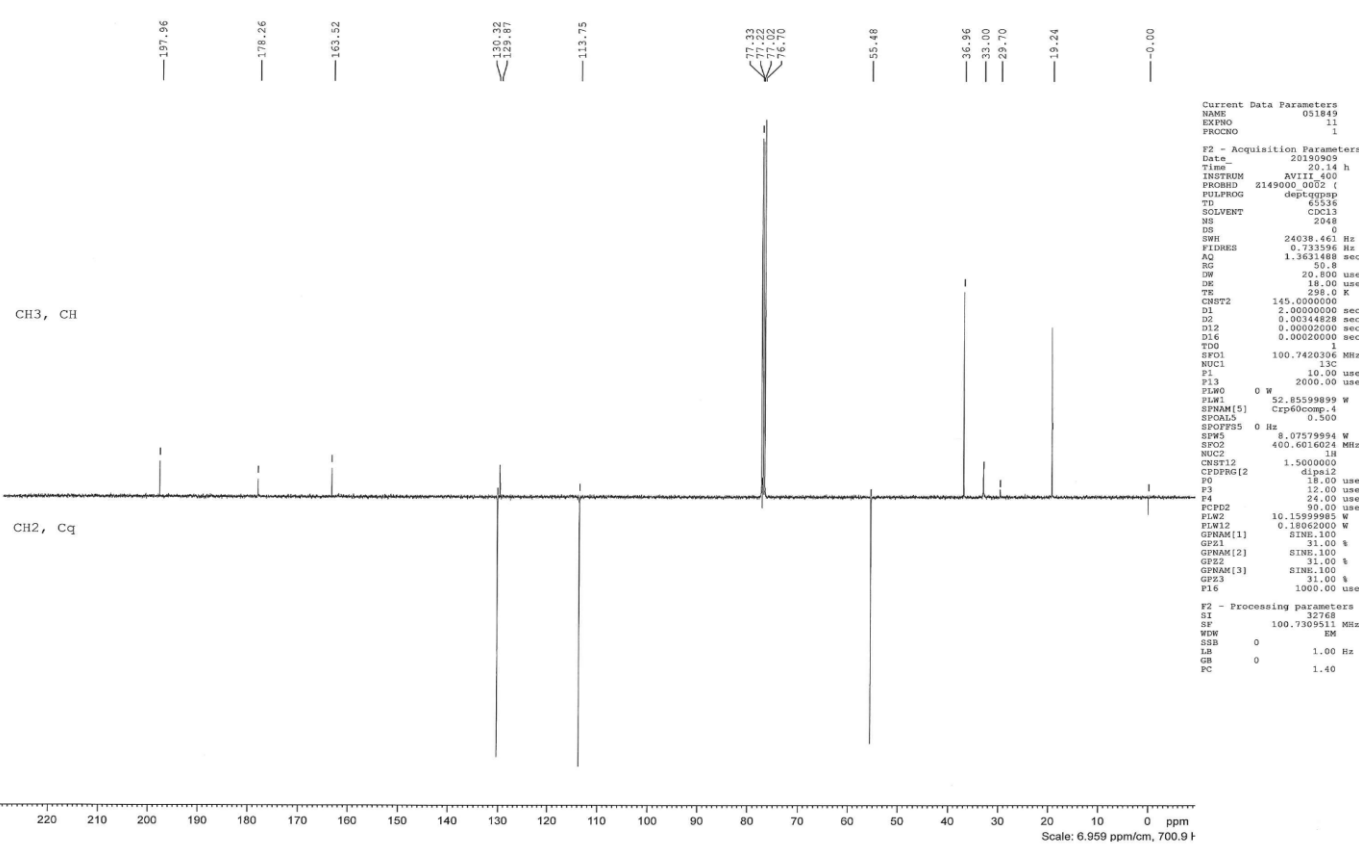

# 1-(4-Chlorophenyl)-5,5,5-trifluoro-pentan-1-ol (S-1)

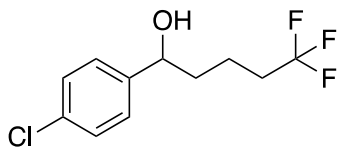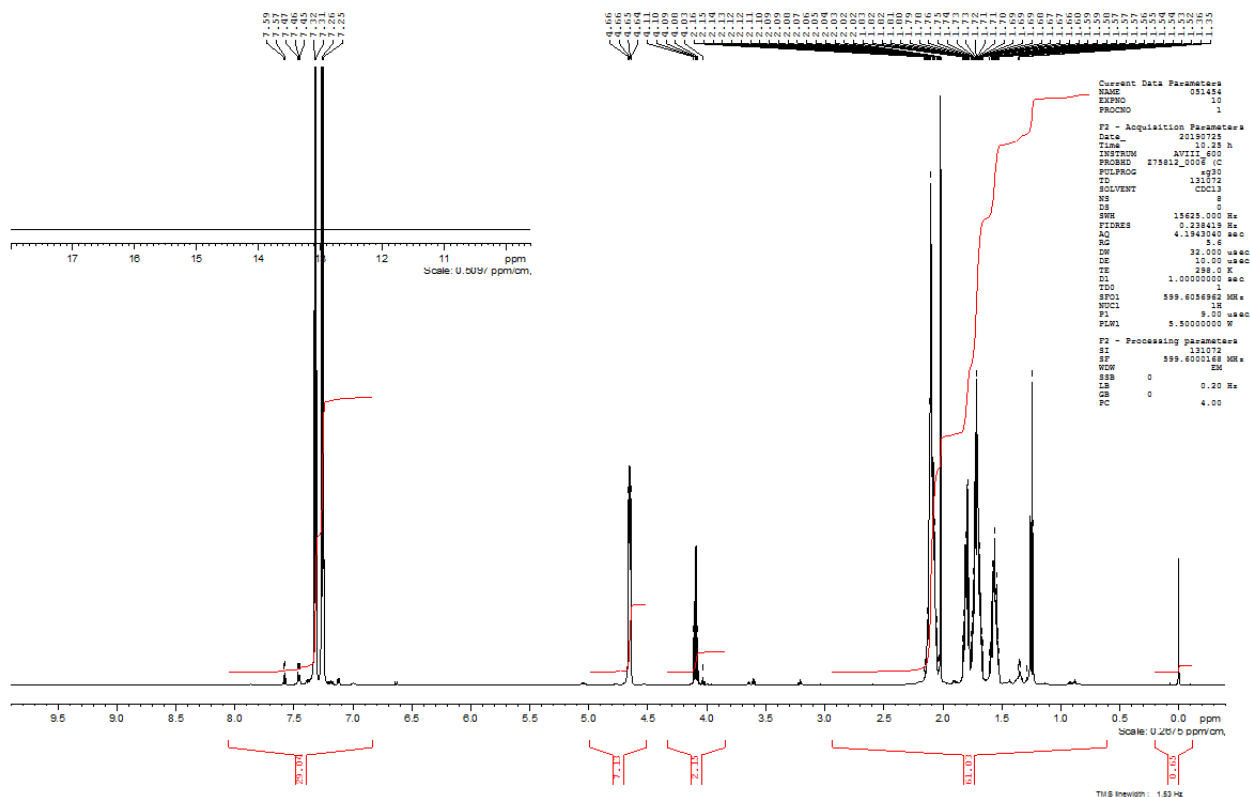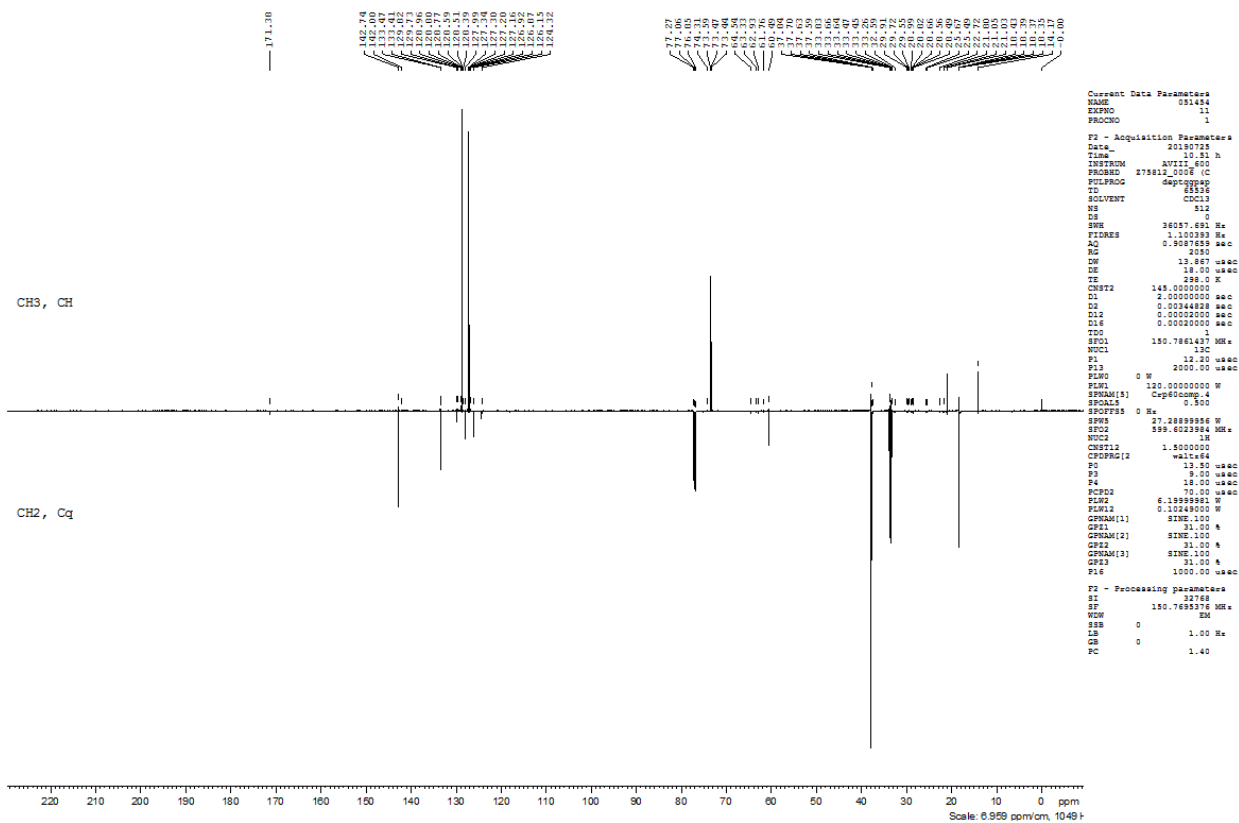

# 4,4-Trifluorobutylsulfanylbenzene (S-2)

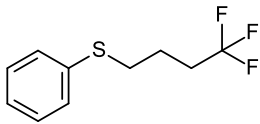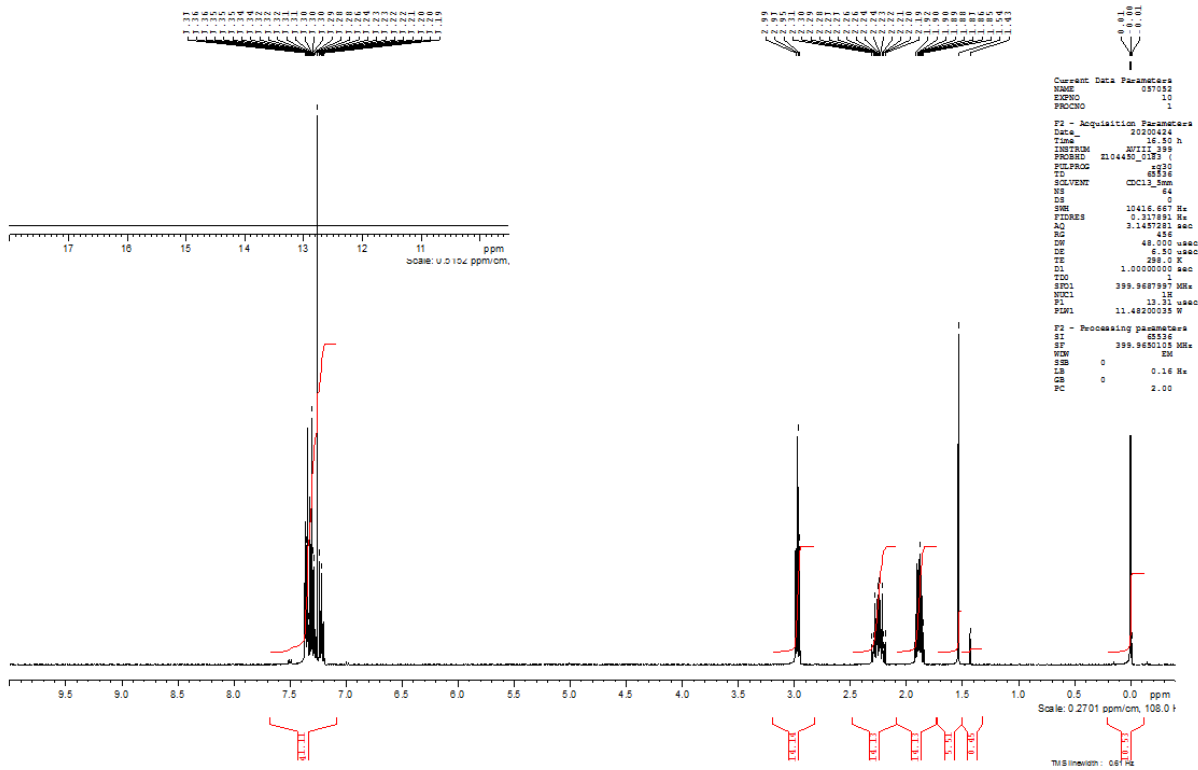

```

Current Data Parameters
NAME      057032
EXPNO    10
PROCNO   1

F2 - Acquisition Parameters
Date_    20200425
Time     16:30 h
INSTRUM  AVI11399
PROBHD   210443_0193
PULPROG  zgpg30
TD       65536
SOLVENT  CDCl3_Sm
NS       64
DS       0
SFO      10416.667 Hz
FIDRES   0.217891 Hz
AQ       3.1420793 sec
RG        456
DE       48.000 usec
TE       298.0 K
D1       1.00000000 sec
TSD      1
SFO1     399.9687997 MHz
NUC1     13
PC       13.33 usec
PCW1     11.48200035 W

F2 - Processing parameters
SI       32768
SF       399.9681019 MHz
WDW      EM
SSB      0
CB       0
PC       2.00
  
```

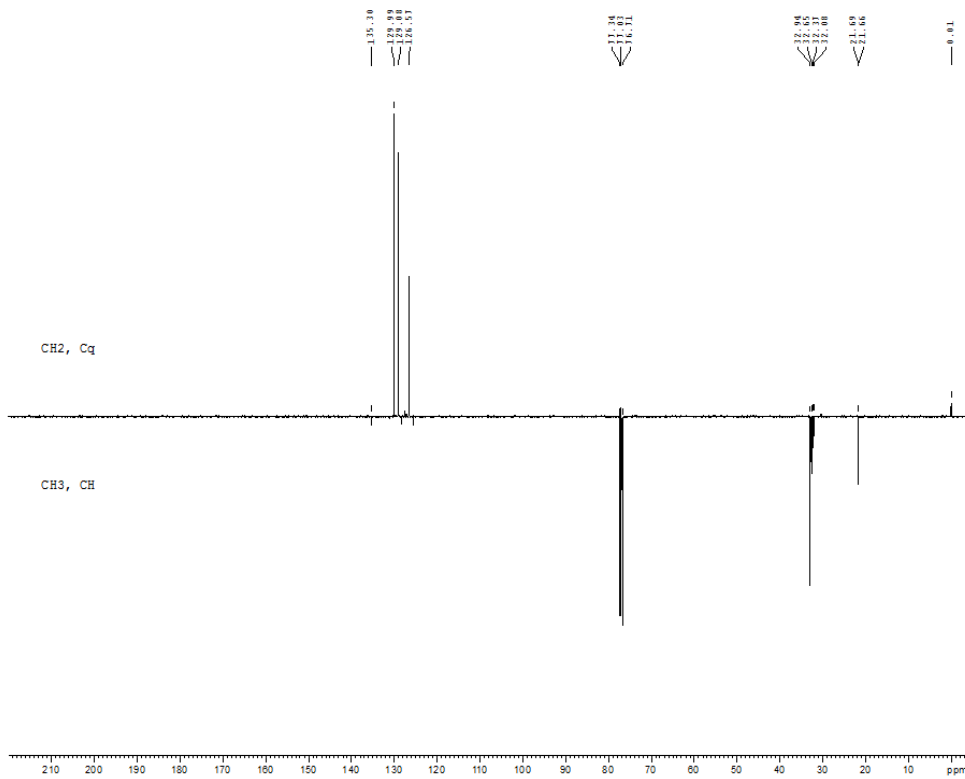

```

Current Data Parameters
NAME      057032
EXPNO    11
PROCNO   1

F2 - Acquisition Parameters
Date_    20200425
Time     16:10 h
INSTRUM  AVI11399
PROBHD   210443_0193
PULPROG  zgpg30
TD       65536
SOLVENT  CDCl3_Sm
NS       24376
DS       0
SFO      24039.461 Hz
FIDRES   0.333356 Hz
AQ       1.3631488 sec
RG        200
DE       20.800 usec
TE       298.0 K
CHS22    145.0000000 sec
D1       2.00000000 sec
D2       0.00344828 sec
D3       0.00000000 sec
D18      0.00000000 sec
TSD      1
SFO1     100.6283414 MHz
NUC1     13C
PCW1     9.80 usec
PCW2     2000.00 usec
PCW3     0 W
PCW4     11.28559930 W
SFOA1(1) Cp60comp.4
SFOA1(2) 0 Hz
SFOA1(3) 0 Hz
SFOA2    7.22160008 W
SFOA3    399.9688999 MHz
NUC2     1H
CHS22    1.50000000 sec
CPDPRG2  d1gpl2
PC       13.37 usec
P3       13.31 usec
P4       30.00 usec
PCPD2    11.48200035 W
PCW1(1) 0.25112000 W
SFOA(1)  31.00 %
SFOA(2)  31.00 %
SFOA(3)  31.00 %
SFOA(4)  31.00 %
SFOA(5)  31.00 %
PCW3     1.00 Hz
CB       0
PC       1.40
  
```

# 1-Methoxy-4-(4,4,4-trifluorobutylsulfanyl)benzene (S-3)

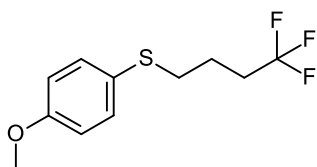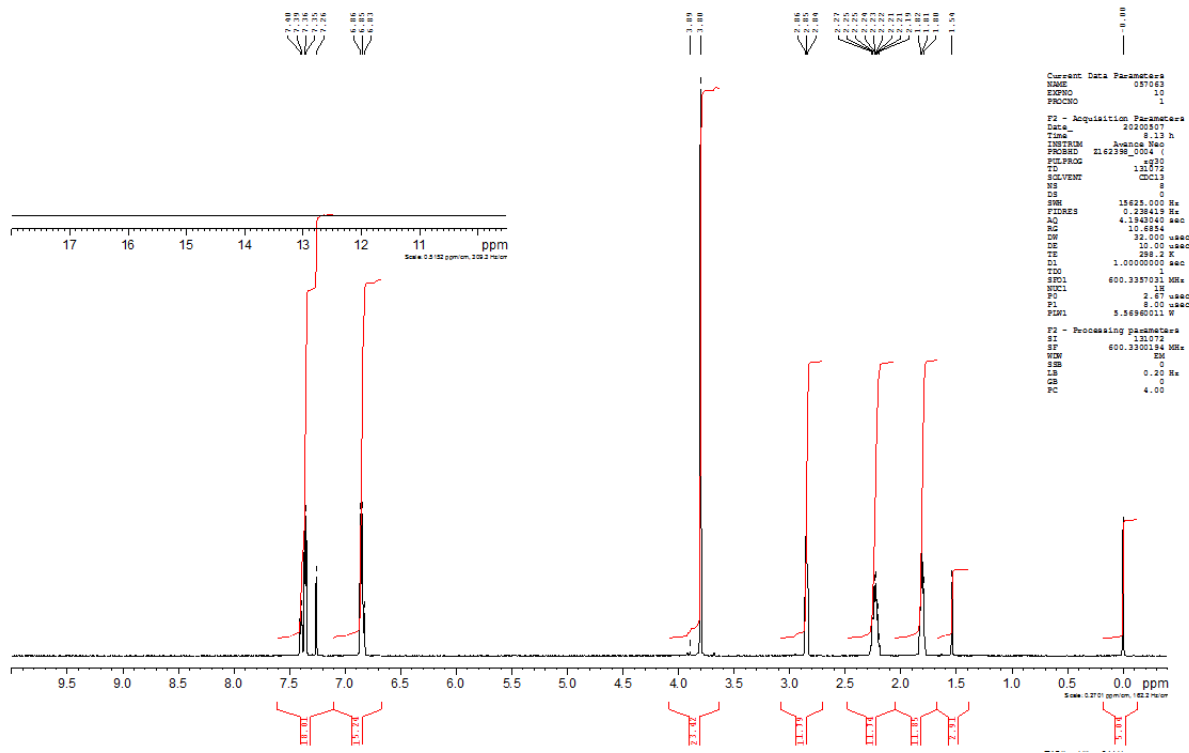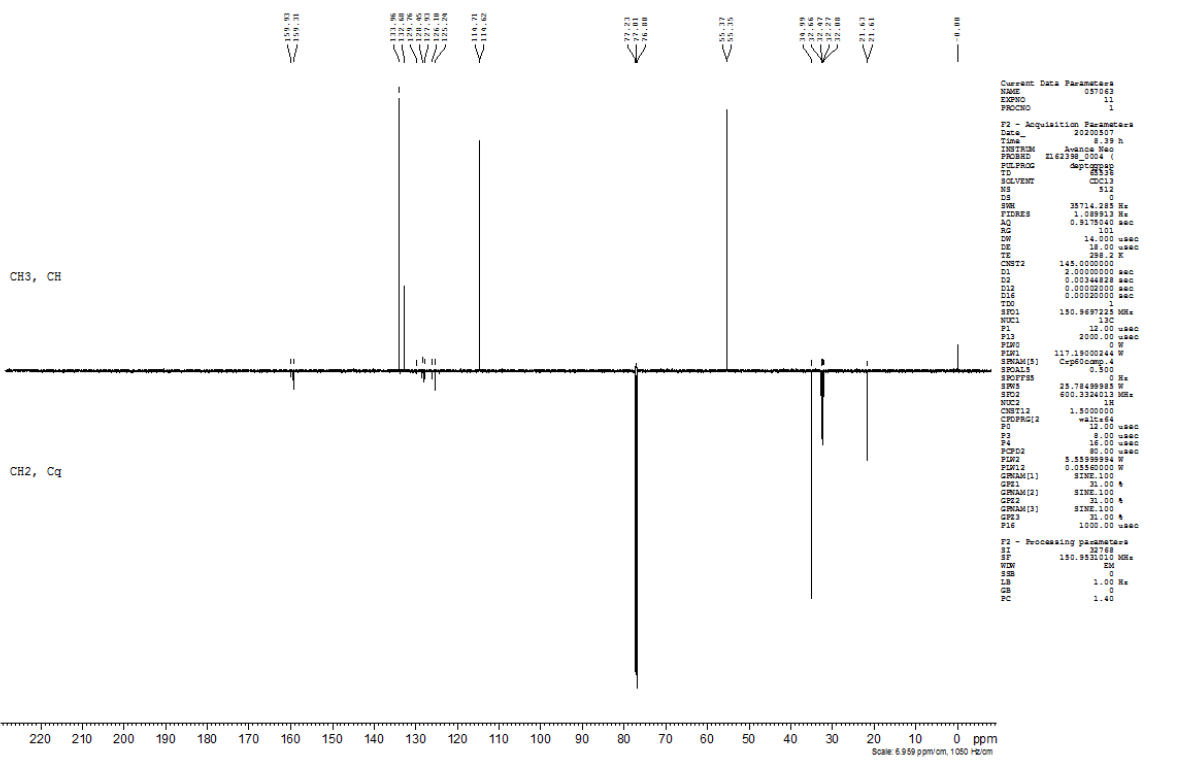



# 1-Bromo-4-(4,4,4-trifluorobutoxy)benzene (S-4)

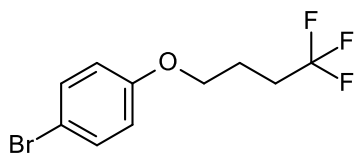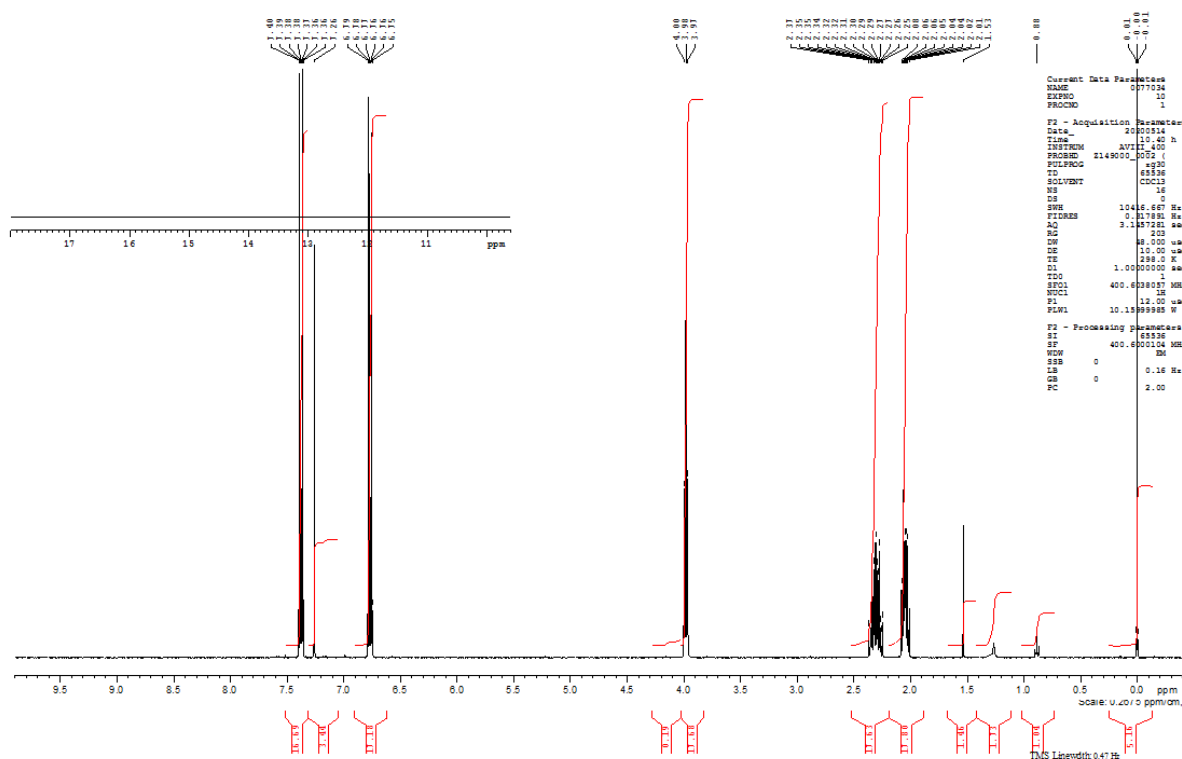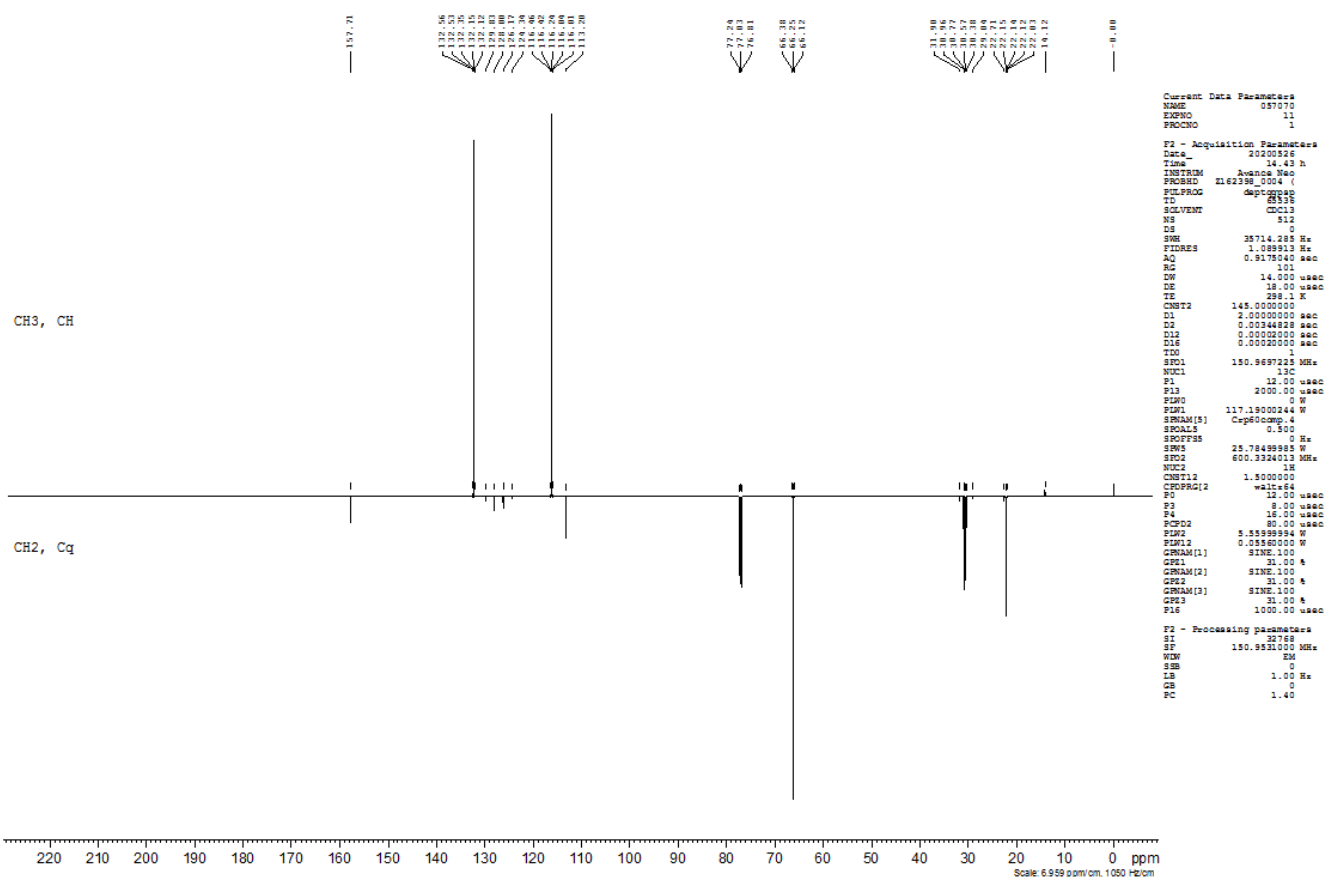

# 1-Chloro-4-(5,5,5-trifluoropentyl)benzene (16)

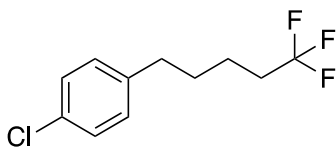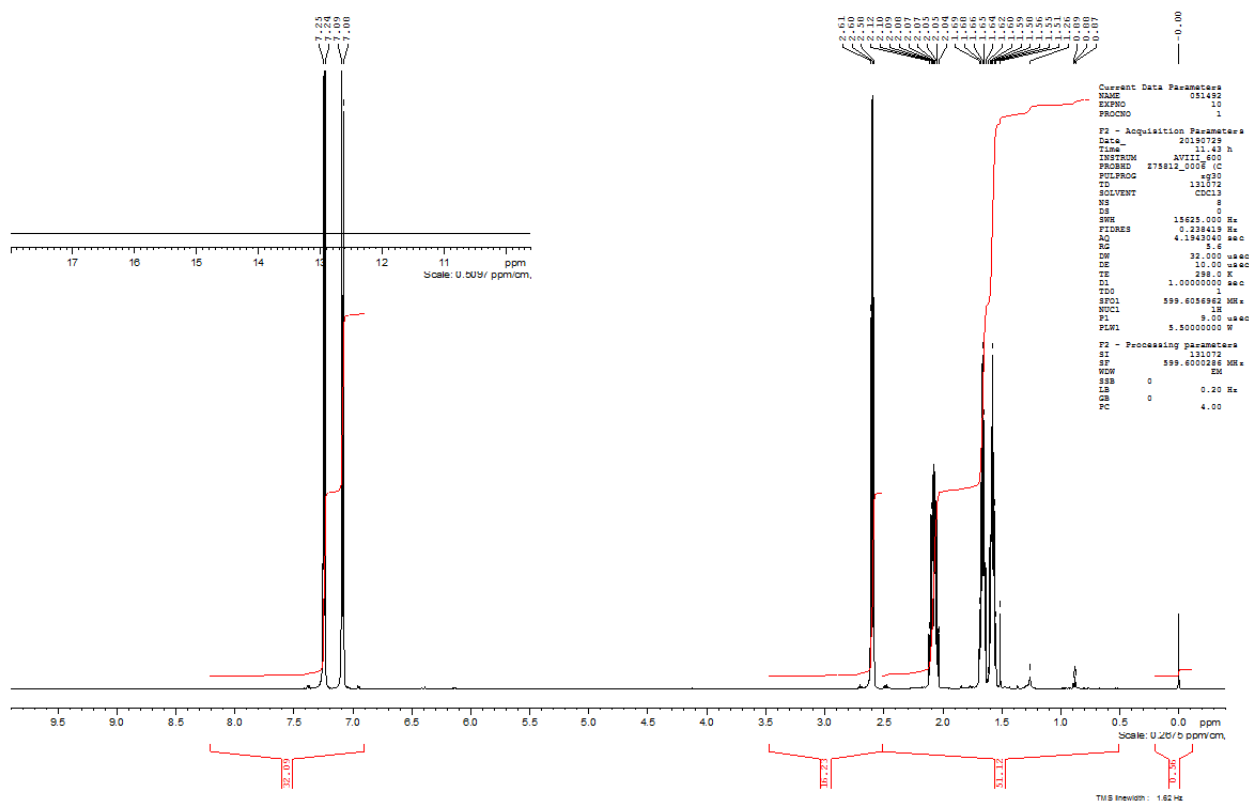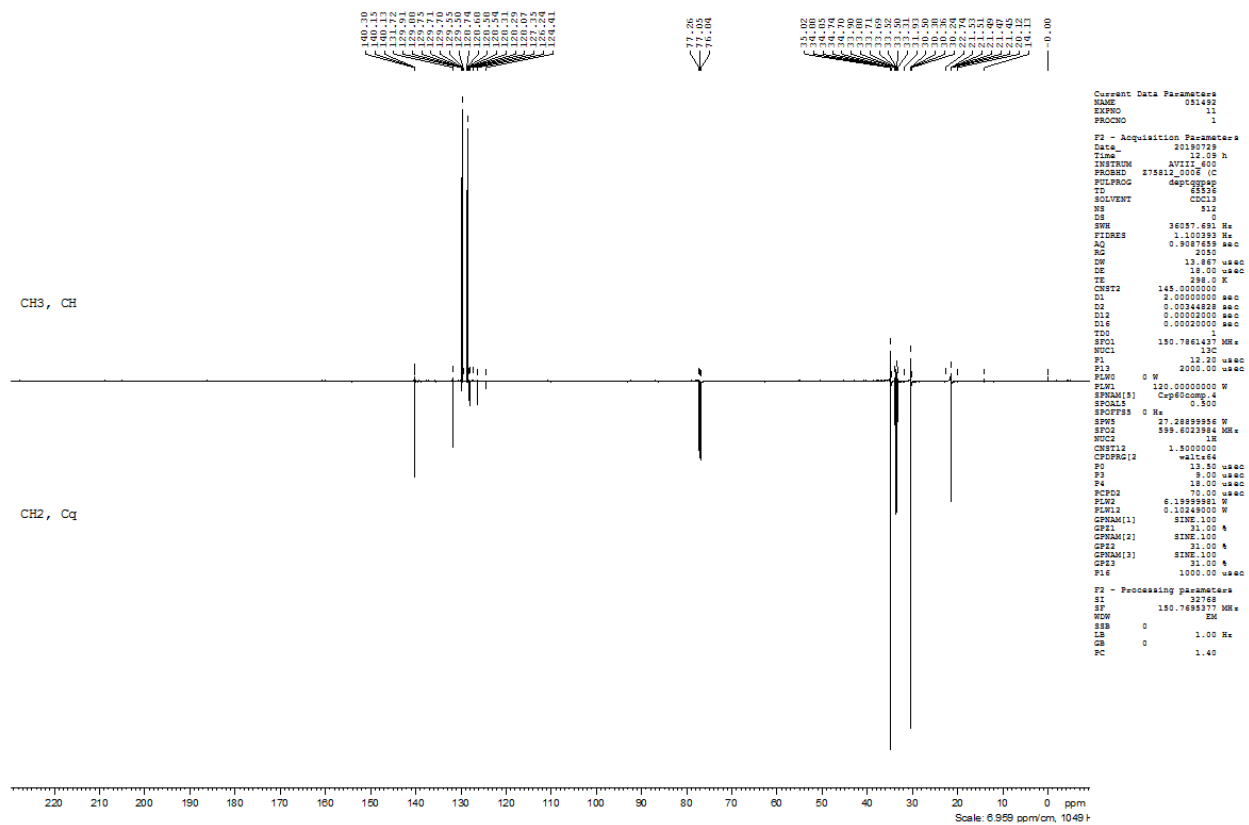

2,5-Dichloro-8,9-dihydro-7H-benzo[7]annulene (17)

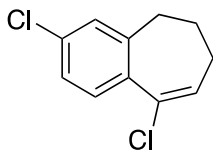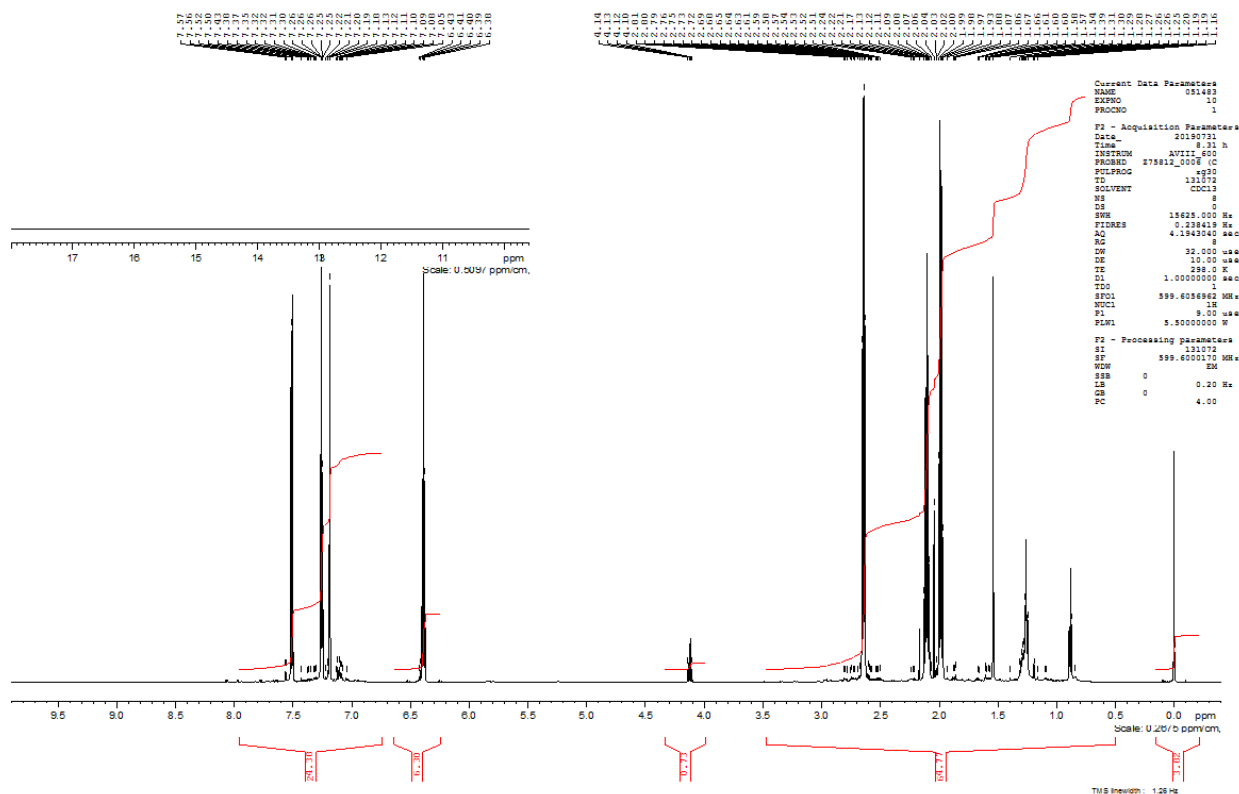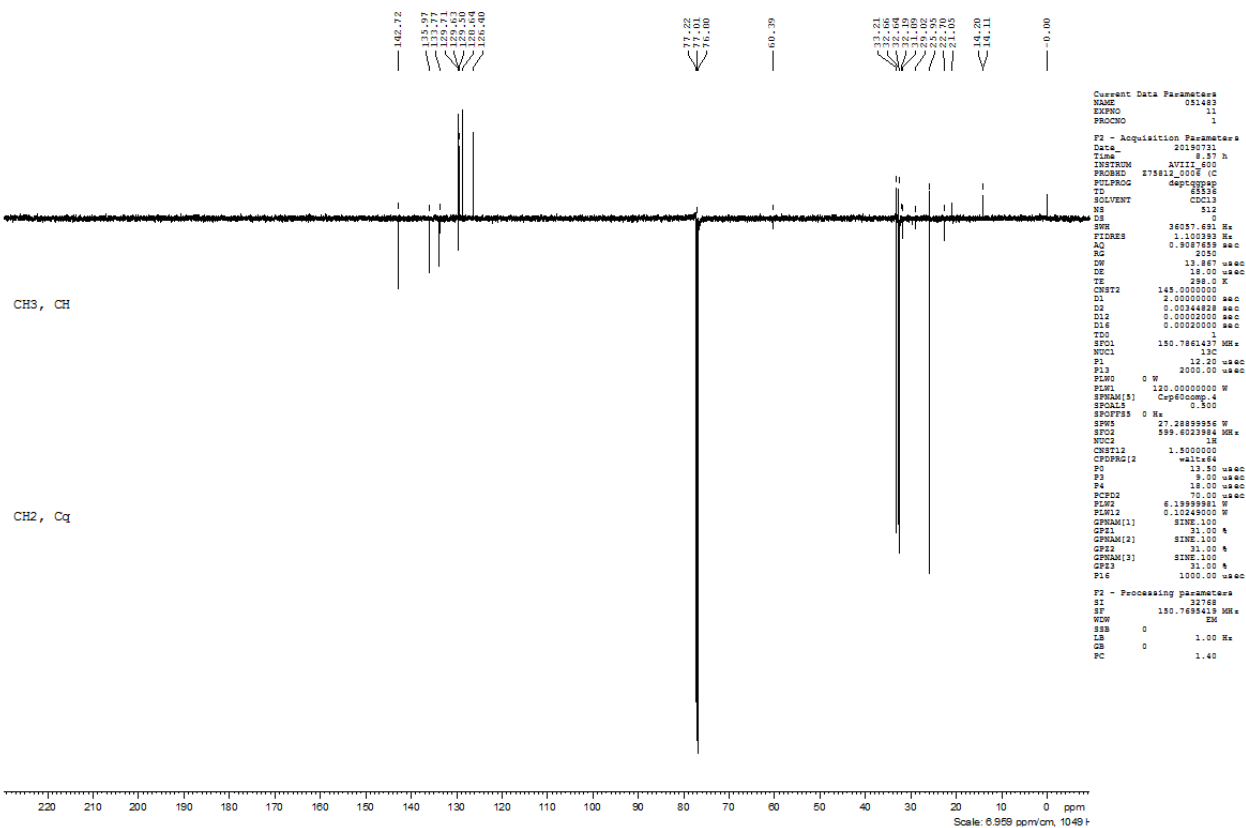

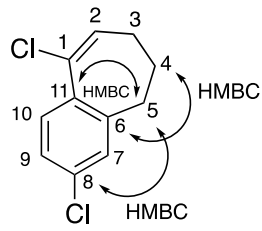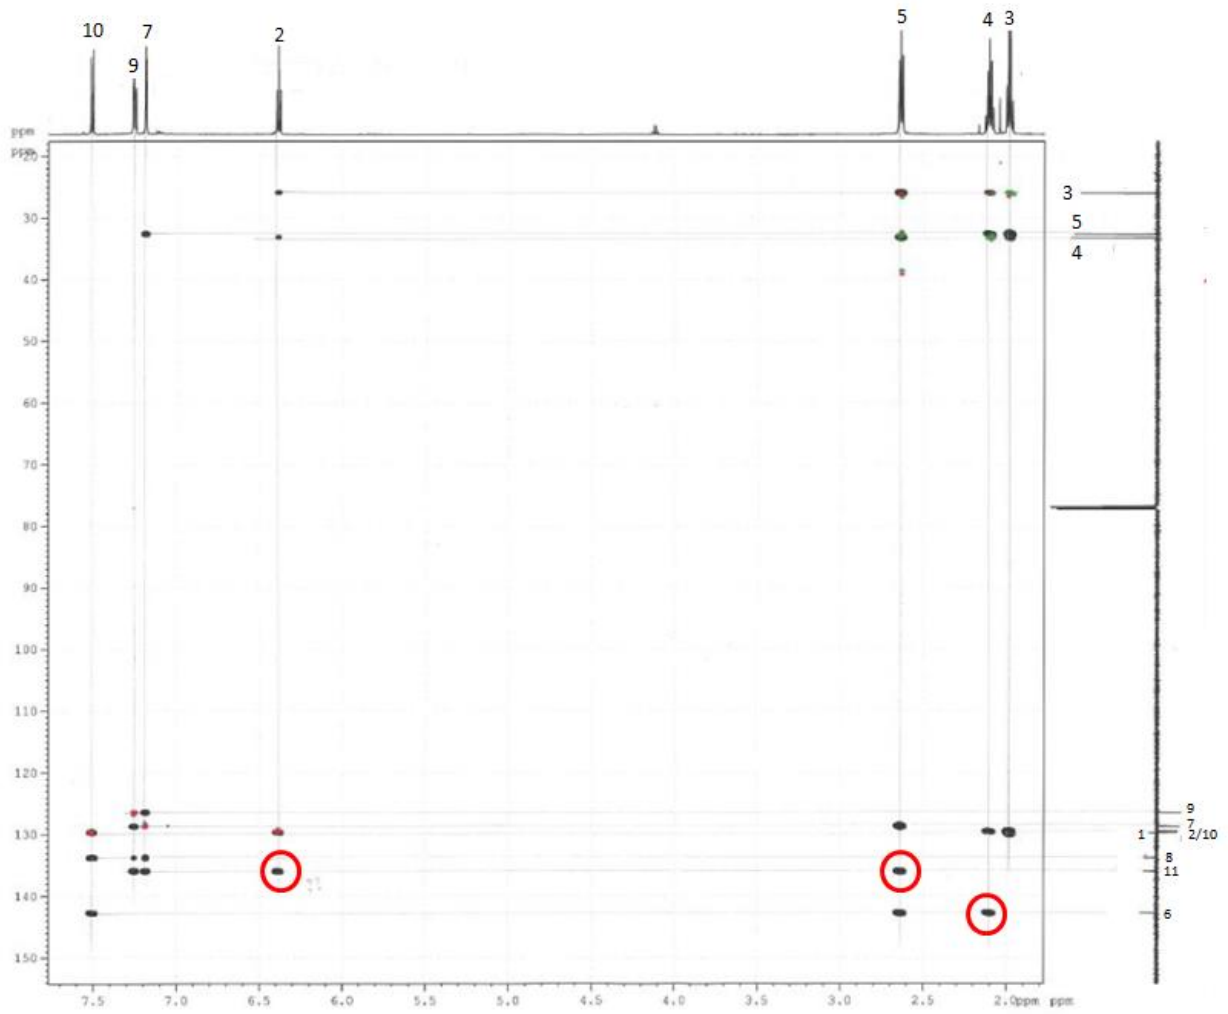

$^1\text{H}$ - $^{13}\text{C}$ -HSQCs (red and green) and  $^1\text{H}$ - $^{13}\text{C}$ -HMBCs (black) of 2,5-dichloro-8,9-dihydro-7*H*-benzo[7]annulene (**17**).

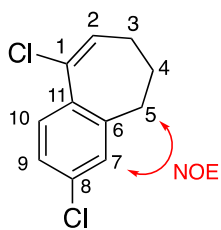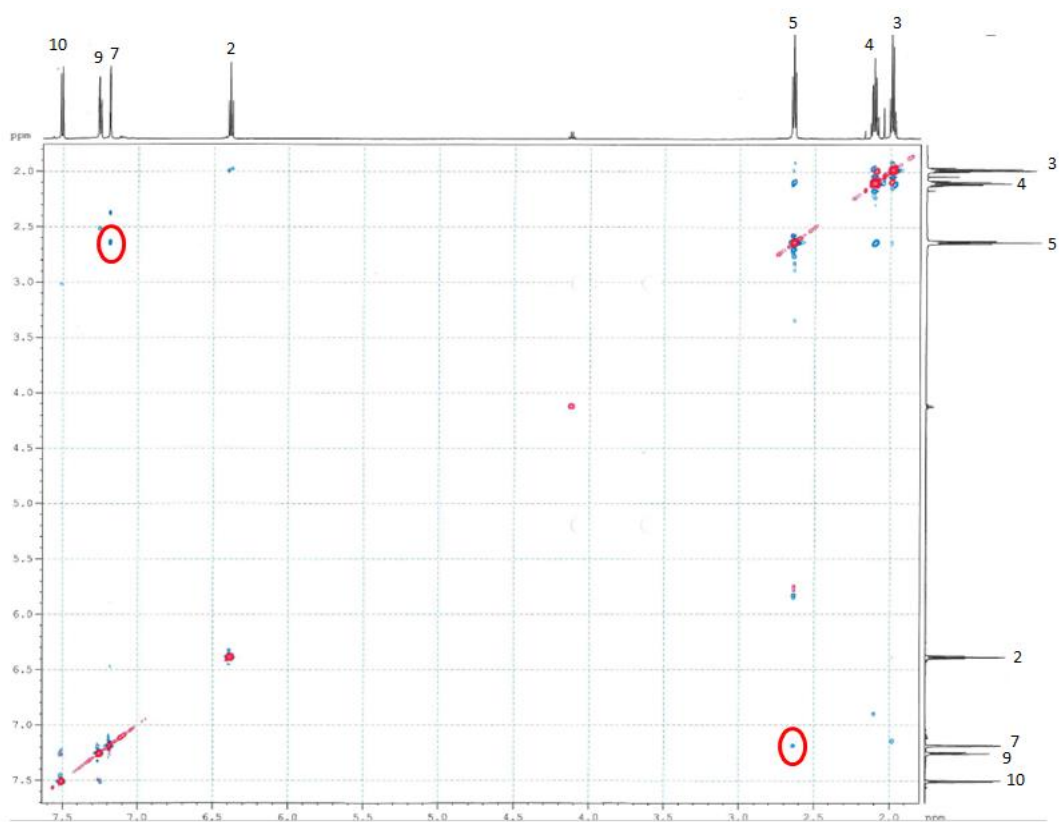

NOESY of 2,5-dichloro-8,9-dihydro-7H-benzo[7]annulene (**17**) with cross peaks in red and dia peaks in blue.

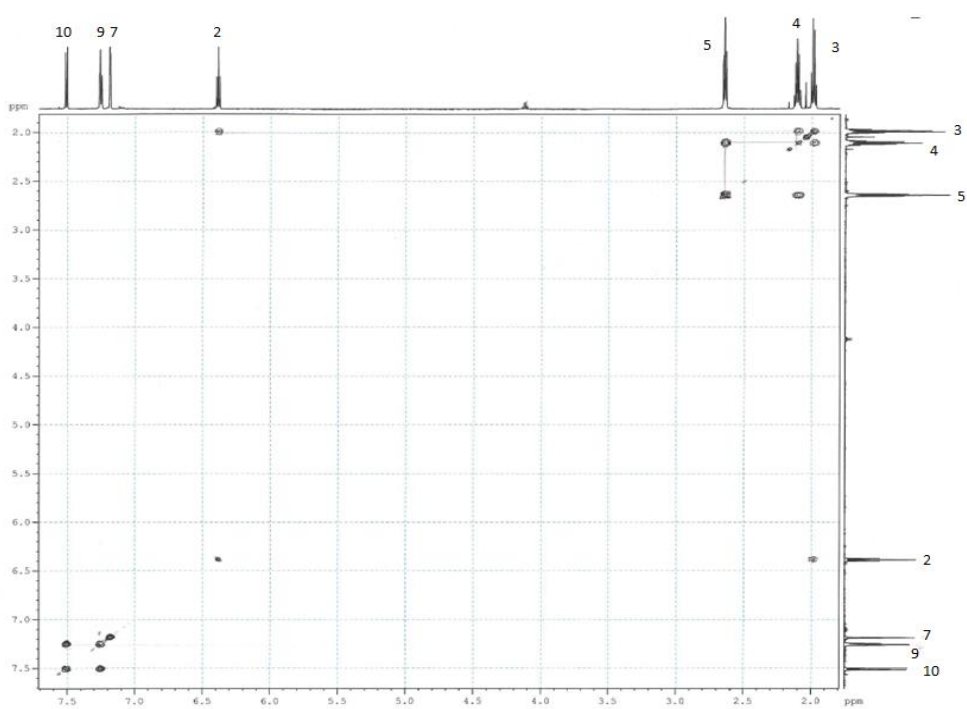

COSY of 2,5-dichloro-8,9-dihydro-7H-benzo[7]annulene (**17**).
